# Supplementary material for: Impact of the White Collar Photoreceptor WcoA on the Fusarium fujikuroi Transcriptome
Source: Front Microbiol. 2021 Jan 18;11:619474. doi: 10.3389/fmicb.2020.619474 (PMC7871910; doi:10.3389/fmicb.2020.619474)
Supplement: Supplementary file 3 [file Table_3.XLSX]

## Sheet: Legend
Supplementary Table S3
Clusters of genes according to their induction or represssion pattern after lllumination in the wild strain
Only genes exceeding a four-fold change of 4 (log2 fold of 2, p 0.05) are considered
'Fast induction', 'intermediate induction', 'slow induction', ' Fast repression', and 'slow repression'
Set of genes corresponding to the categories indicated in Figure 2D
Average expression values (TPM) for the listed genes in the two strains under the different illumination conditions are indicated in columns B-I
Standard deviation values for the listed genes under all tested conditions are indicated in columns J-Q (blue color)
'Strange pattern''
The same data are displayed for a gene with a pattern differing from those described above

## Sheet: Fast induction
Probe	WT_0	WT_15	WT_60	WT_240	WC_0	WC_15	WC_60	WC_240	WT_0_desv	WT_15_desv	WT_60_desv	WT_240_desv	WC_0_desv	WC_15_desv	WC_60_desv	WC_240_desv	Feature	IMI	Protein name	Seq	Description
XLOC_001436	1.56302	23.6315	43.6557	23.6708	2.69436	2.48267	2.05692	2.54674	0.36377	4.24363	14.1644	11.7898	0.868765	0.356023	1.32219	1.41129	FFC1_00478	FFUJ_00436	probable deoxyribodipyrimidine photo-lyase PHR	MPPKRTKRESSSPPVKKAKTSKTNGSSSSDAWRQPHHKAGEAEENGIAIRKFYPPEMSNARARAYNDNELPRPIEVLVSALEDTAQERKSTDVKKAIVHWFKMDLRLSDNRALALASDKAKEAGVPLIAMYIISPQDYEAHLRSPVRVDFMLRTLEVIKHDLAKLDIPLYVETVEKRKRVPDRILELMDEWGASHLYANMEYEVDELRREASMIRDFAENGKAFEVVHDTCVVPPGELHTGAGKQYAVYTPWYRSWVAHIHENLDLLELYDPPQKNPGSARKDFAKLFDVEIPDAPKSKQLDGEEKERLRSLWPCGEHEAKKRLDKFCEEMIGNYQKKRNIPAEAGTSSLSVHLASGTISARTCVRTARDRNKTKKLNGGNEGIQTWISEVAWRDFYKH…	probable deoxyribodipyrimidine photo-lyase PHR
XLOC_001482	20.5495	81.3571	129.522	27.4546	142.285	163.307	142.789	31.8098	3.39215	49.3279	17.91	3.35095	83.1826	120.698	114.694	12.0312	FFC1_00549	FFUJ_00502	uncharacterized protein FFUJ_00502	MADQKDRWSTNAYQHSASFVPKLATKVVQWLDLQKEDVLLDIGCGGMYLSPNLDHRPETDRLDGILNAEFAKILAQGSGSMHGVDSSASMIEAARELCKGSQNATFDVLDATQLVSKPELQKGAFTKVFSNAAMHWILRPEDTRAQFFKGVYASLAPGGSFVFEMGGFGNVSEMRTAALSAVGRRIGMQAALAADPWFFPDEAWVTKALQDAGFVVERAEREWRPTPTDKGGVEGWIRLMASQFIDAISDEKEREEAVQECVGVLREVCRNPSGGETIHYVRLRGVARKPE	Putative methyltransferase C70.08c
XLOC_000421	52.6987	253.179	374.117	141.517	0.690675	1.90866	2.53951	2.25275	16.1594	66.54	64.223	99.9609	0.118961	1.00012	1.70381	0.731348	FFC1_00754	FFUJ_00691	uncharacterized protein FFUJ_00691	MPTMLGLTNDRSPHGLNAEESKFGGPSSQRGMELTPRQQNGSIVSGIEGSDFFNGGGKQKEHDADEESDEENLKTIKGRNLSAVKEMETLLWRALCDKPKTALKYIAKDAVMSNRFLFGDPVPRTADSDPSLEEEIKHCEEWLAYKMHDPQPVEIGLMAAAIGYKLILFRQLDQGDGNFGMQTVQATCSSSWRQLASGDWELTSMFAG	hypothetical protein FVEG_00634
XLOC_001813	1.5162	6.33896	3.80975	3.34861	5.71876	4.97035	5.07907	5.41068	0.377856	0.532315	1.80324	0.676993	2.80877	2.80724	2.1301	3.13698	FFC1_01180	FFUJ_01103	related to papaya ringspot virus polyprotein	MPSNSSGRITKARKNKNSTPHQKNHRWESFTTKISKFNSLQPLRKVRRHDLDTEDLSTTTSYFQTGLQKWGELNVSKPFSAFKTKVWPLCESLPQLLHFEQRIMDLLADFIAGQDKEALEPLLDLLTAFSHDLGVRFEKHYGRSLDLIVAIAAKPQDADVIEWTFGALAFLFKYLSKLLVPDLRPTFNVMAPLLGKSRHPPHIARFAAEALSFLVKKAAAPSHRETALKRLVECARDDLLSIKDDRQFTLYKDGLMNMFAEAIKGTDNIIHSTGPAVFAALVDAIPEEERTLTEDTTWTDVVCGVLTSVIHHATADTFGDFATGVHQTIRANMERLSPADRQWQAVPLFRIYGTMAGVRKGNRLTDWAPLIKNFVELLSEVTKAGLEVPHDAASAVWKF…	related to papaya ringspot virus polyprotein
XLOC_000761	60.8643	521.728	1118.57	1393.28	16.7372	26.1454	32.977	27.46	15.647	118.629	436.152	698.19	4.94319	10.8655	13.5586	10.5342	FFC1_01379	FFUJ_01292	uncharacterized protein FFUJ_01292	MDSGAPQTAPTGNVSSRRRSSGFMPAFASLSEQKRAGDANAARRASMSDQQAKGGMFSQFFHNNFGKNAAK	conidiation-specific expression protein
XLOC_000877	0.949079	3.90243	1.51926	0.712408	1.66338	2.15379	1.59055	1.68678	0.380317	2.33578	0.0445168	0.256846	0.339868	0.309139	0.164256	0.545344	FFC1_01585	FFUJ_01490	related to glutathione transferase omega 1	MTALNTPPPGSGSGSGPGLSATFSTPGLPPDYRDALELGLQGYVAPGIEEAYHIHAIHNSATIATPAALGQFGILAPIAVSVPVVETPADRIFSVQNNAHTQEIRRSGGHLSSKIIVDPPDLEMWRNKLFNVDETIVLTHEEFETYFPHVDNVYSHRSTQRYKRKPFISHYWDCRMKGRPPGTPKSDDPNKKKRKRNVRQRDLCDVKIKITEYFPGARLDLDNSSGLDACLAGQRLWTIQRVNGNGGNGKGDGVAGPHRHTLERSDEIKKNSVQRYLANKGGAKWDKEKAQVSHIHDANSEEKEFIIRRILKKALLKATGAALLTARKHAKESEFKLYAVCFCPFSQRIWIALEAKGMPYQYCETDAFRHPTQPLLANLHGDVPAIVHSGWSCSNSAVI…	related to glutathione transferase omega 1
XLOC_002017	341.09	1348.99	1133.72	731.776	103.011	106.16	132.375	166.464	100.117	305.559	179.663	202.381	29.7514	47.216	83.935	89.5798	FFC1_01589	FFUJ_01494	related to transcriptional repressor	MTMHAINAAGRRVSLLNDESASQQQQQQPTQRPPLSFHSHSSYAFTQSYPTPGSTSSSPNTPELLRSDSYDSQMSNDPLSPLTPNVDYYPRQQVMYTISQDYNMEAKHAQYADSTRSASYDAEMVSQPRSSPMPERPGKRYPCRYRDTHGCEKTFTTSGHASRHSKIHTAEKAVQCTFAGCQKKFTRADNMKQHLETHFKDKSRSSTSQRSHRTSLADARRNSTSGRPSASRTSSSRSRRDADPYPLPTPPLASPSVNSGSWDLGGRNLPILNRPVAGRTPSGLDALAMAVACQEGSGV	related to transcriptional repressor
XLOC_015985	0.612167	2.85246	1.6822	0.509524	0.102907	0.1105	0.182956	0.30057	0.167848	1.0491	0.568681	0.0290955	0.0621205	0.0664594	0.085913	0.0861402	FFC1_14868	FFUJ_02148	related to glu/asp-tRNA amidotransferase subunit A	MNSQTTLNLLDATIGDLKHLLDTRAITSVELVALYLHRIGRYDCRGPCLNSITVINPDVFAEAQASDDYRASGKPPRPLEGIPFTVKDSYKVKGMTVAAASPAFAKLEATCDAAIVELLRKAGAVVLGKTNMPPMADGGCQRGLYGRSESPYNQKYMPTAYASGSSYGCGVSTAAGLAAFGFAGEAVTSGRSPASNNALVGYAPSRSVIPPRGLWPLYPTCDQVVPHTRTMDDLFQVLNVVVADDDAAGDADFWRSQPYVPIPKVSDIRPSDYLTLANPDALRNKRLAVPRCFIGVEGAKPENACSVGVRALWDRARADIEKLGATVIETDFPLFENYTRQDFPGQSMNVPNLPEDWPAIERCEMIALSWNSFLRGNGDKDIPSFTSGVELDKIHPHIA…	related to glu/asp-tRNA amidotransferase subunit A
XLOC_016015	2.80083	17.3922	8.03338	3.69037	0.264121	0.181902	0.0354752	0.0502682	0.0684875	3.83641	3.47144	0.54084	0.122475	0.191175	0.0596883	0.0430988	FFC1_14925	FFUJ_02205	related to galactinol synthase	MVSENTATLPSKVWATLVTNDDYLKGVLTLNYRLRCVKSKYPLLVLYTSTLSQASVESLKRRGVAALQVPRLAPTTAKEYTDDPRFNECWTKLIAFSLTDYSRIVLLDSDMLPLQSMDELMDLDLDFPLLSGSGDTERSKRVFAACHACTCNPLRKPHYPPNWKPENCALTTQHVSPDTAQTTGADNSSGLGKLNSGLLVINPSKVIFDQIVTKLNEAGLDYQFPDQDLLADLFKGRWVALPYIYNALKTMRDPSVHGAIWRDDKVKNVHYILSPKPWDELGPDGTWKGDKPIHKWWIDAYKSMRAEEKTLGIS	related to galactinol synthase
XLOC_015863	0.755063	1.46533	3.00299	0.680188	0.238098	0.468327	0.759088	0.355803	0.410142	0.180348	1.30341	0.188702	0.307117	0.245377	0.742968	0.26334	FFC1_15019	FFUJ_02295	probable transcriptional regulator	MYIRAAHAEADLRVLRRLIHENPLGMLTTGIKSQTYSFLQSSHIPFLLDVKDESSETELGRLRGHLARQNPQSKAMIEHCTSTPSLKNYLEDEVLVIFTKPAHHYVTPKFYTETKAANGKVVPTWNYAAAQVYGKARIYYENNEETSSFLGQAISDLTDHNERGAMGYTAESQWKVSDAPEKYVELLKRNIIGIEIEVTKLEGKFKMSQEMGVGDREGVVKGFEVLGTDVADEIARVVKERGELKDQK	probable transcriptional regulator
XLOC_015892	13.0949	48.0332	51.5678	11.4233	2.11628	9.94347	9.89393	16.8952	3.01062	16.4527	22.9694	2.68416	2.88275	8.47498	13.476	28.7286	FFC1_15070	FFUJ_02346	related to multidrug resistant protein	MPTHFSDDPPQVINQDDLHVANSRLQQNLDGSTDHSGDERTHNANGAGLEKLGTYDKYEITEDDCYDELGYSFPKWKKWYILTVIFWVQVSMNFNTSLYSNAIPGISEEFNVSAQAARCGAMIFLVLYAFGCELWAPWSEEFGRWPIMQASLFLVNIWQLPVALAPNFATIMVGRALGGLSSAGGSVTLGMIADMWESDHQQYAVAYVVFSSVGGSVLGPIVGGFCEQYLHWRWSIWIQLILGGFVQIVHFLTVPETRSTILMNRIAKKRRKETNANFWGPDELVPFRERFSAKEILITWTRPFKMFLTEPIVLVLSLLSGFSDALIFMFIQSFALVYKQWDFDAVQIGLTFLAIGVGYVIAWLAFIPAIKKNIKERREKPNDERAQYESRLWFLLYTA…	related to multidrug resistant protein
XLOC_007331	49.5492	181.441	215.785	152.076	282.991	166.463	256.712	456.858	32.0993	21.5096	57.1305	65.2124	93.6654	35.7871	44.187	248.658	FFC1_06993	FFUJ_02606	related to finger protein AZF1	MALAAQSSDAPNWGRWSQQLPGDYTMMESPHMIPFDSRATTTGPLQRPVMTPYMVQPPYSSGPVNSLTAPHYQVPNPYQFGGYQGPPTPPHHSTPFKIEYNDRRPMGHDNDHGRIPSYSREMKYTYAEQAPSPARSDSQASTVRSSCTNPSMGSKTITSNETLNPGDQINFETEVDELMKAIQRKADLQADTVQQPLTPGMSPVSEASFESQGTPGPMDSKTSRKRYRCDGPNCQKSFTQKTHLDIHRRTHTGIKPYNCDFPGCDLTFSQLGNLKTHRRRHTGERPFACDKCDRHFAQRGNLRAHLQTHQGLKPFVCILDDCNKTFSQLGNMKTHQNNFHKKTLKKLTMKFAKIIASGEEVTEADRELFEYFATHYKNSNKGIKGRGKARTVAERKTKA…	related to finger protein AZF1
XLOC_007384	3.79348	7.28483	19.0904	2.22263	0	0	0	0	0.692692	4.16211	14.8588	1.025	0	0	0	0.183422	FFC1_07083	FFUJ_02691	probable glucose repressible protein Grg1	MDSIKNTVNQATEKVQEGLSGTSKEANKEVAKDSNAGVGTRASAAKDAASDKLDETKHSAKSEGYSAQK	probable glucose repressible protein Grg1
XLOC_008177	110.063	901.669	319.928	152.465	67.786	55.8554	75.6071	69.549	84.5906	241.082	114.32	55.6203	6.5215	10.2405	15.2054	42.1981	FFC1_07221	FFUJ_02814	uncharacterized protein FFUJ_02814	MPKRSLDAANMGSPIKPAPTRKTERSHEENQERAYIAASRRADRSLEARVQSAKMASEIHKKRTGKAFRITEQIVMKEEMYEEEDDEFPRSYRILKQNMQTDNPAFNARVDAYLINRVAMSQMISATESDWRNNEINMEFAKMFPQAKQQAQSLSHRYSTPGYSALHTQNNTISSPMEQHFEPNFQPINYGQPGNNGHGGRSLSMSGPISEPRNDTAMSPSALTPGLGSHPETPQPHCTASFANVQPPHMMEYNSDSSAFTSELPTEARLLMGGGMNETFSSALYPEPHNWVGSQSYPYSGDSKYVEEEDVGLGIAGESYPEISDTAPWDRFDTGTPTKTFGDQEPAWDYFLNENWGNDQQQQ	uncharacterized protein FFUJ_02814
XLOC_008395	5.32505	21.5487	9.79218	8.1088	17.9481	18.6411	14.039	15.2477	2.01013	0.693345	4.44848	2.61811	8.87322	10.6833	6.26213	8.67506	FFC1_07624	FFUJ_03200	related to UTP10-U3 snoRNP protein	MATALAAQLAQVAANSKSTLNVKAQKAAHSKSLIWEPRVAATQSYQTLYTTCFQGFEELCQLDARFAPFQSTIFSEESQNQDRTQLTASENEELDRRVEAFLRLAGSRLRLMPAIKSIEWLIRRFRIHEENTQALLLTFLPYHSIPAFATLLSILPSKIPHDFRFLGPYIRSVTSPPRHVLVREAIQHPSFLTLTSEYTLESCRMQYNYSALVSFWAGIMTEAVSGILDKTRSGRAAVQSENDQALLHRLGPVFAESLVMKKVPSIQIASYMAIAVFVAKGNLEDNAVTAFMDQTVYGWTNDTVRPALVCLAILAQYRSAKQMSSKTTKALMKVTDIGKLLVEIGQERRVDKLANGLCLALIERLAKKGDARGLATIITILSSSVLKDKQIAVIFKSLI…	related to UTP10-U3 snoRNP protein
XLOC_007766	0.605286	1.88988	3.57187	1.00782	0.0752675	0.129672	0	0.141857	0.290508	1.51932	1.91973	0.428721	0.0663792	0.145504	0	0.171921	FFC1_07793	FFUJ_03361	uncharacterized protein FFUJ_03361	MKFLSLLTLASFAAASPFRRQQTVTGTIKSSVDTVSSSSLVTLNEIDNNVALIKNNVDAQLIVQAQALVKANYQAIAQGLAASTTTIVSVTTGAAGGVAGQAIGLTNQQIATLTASILIVIDIIENIGATVTVTVTDLTPALRATFQAEINAVKAAVNPFVSPVLLFAAAVRAANVGGSATITGLDNAIVNLLRVQSEVAASIGIPPLSL	probable 2-isopropylmalalate synthase
XLOC_008552	9.77746	38.1489	87.1621	12.8664	1.56918	1.33286	1.64583	0.829912	8.1527	32.8828	86.7275	6.73202	1.11954	0.919886	1.42507	0.673371	FFC1_07887	FFUJ_03451	probable catalase-1	MTDQVTGAIKHAVMGHRNDKIDQLKANIVEPSENTRITSDYGVKQNNTDHWLRVNSEDQTGASLLEDAFGREKIHRFDHERIPERVVHARGAGAHGTFKLFESAEDVTKAGIFTDTSRETPVFVRFSTVLGSRGSADTVRDVRGFAVKFYTQEGTFDIVGNNIPVFFIQDAMKFPDMVHAGKPEPHNEVPQAQSAHNNFWDFVWGHSEATHMYMWAMSDRTIPRSYRMMQGFGVNTYTLINDKGERRFVKFHFTPELGVHSLVWDEALKLAGQDPDFHRKDLNEAIENGAYPKWKFGIQVLEESQEHDFDFDILDATKVWPEDQIPVRYIGELELNRVVDEYFTETEQVAFCTSHLVPGVGPSDDPLLQGRNFSYQDTQLSRLGINWEELPINKPVCPV…	Catalase-1
XLOC_007842	4.55141	13.7592	22.5775	15.721	2.46779	3.06628	3.68137	4.9328	0.802469	5.08556	12.7074	4.46501	0.555189	0.456967	0.8131	2.65004	FFC1_07919	FFUJ_03481	related to flavin oxidoreductase	MAAYLTNRICHPHHGIPVSRPETPAPAKTEKCSHPIVNKAAKGVPFFTPEQDPPPGLAIQPSDGRPVPRLFQPLKIRNVTMQNRIWVSPMCQYSCHEGFMTPWHITHYGGMAQRGPGLMMLEATAVQANGRITPEDAGIWLDAHVDTLRKNVDFAHSQNTNIAIQLAHAGRKASCVAPWLSAGATATEEVNGWPDDVVGPSDEPFNENMPTPRSMSIQEINQLKKDFVKAANRAVTAGFDVIELHFAHGYLVSSFLTPSVNKRTDQYGGSFENRTRLALELVEEVRAVIPETMPLFVRISATDWLDTNPEYTGKSWTVDEAAKLASLFAERGVDVIDVSSGGNHPQQKVQGGPGYQARFAKHIKKAVGDKMLVSSVGSIKTGTLAEEIISGKEDGVKLD…	related to flavin oxidoreductase
XLOC_008668	0.363155	1.23297	1.55853	1.06579	0.169346	0.206378	0.238519	0.245083	0.147415	0.155395	0.381372	0.379495	0.102646	0.0878142	0.0160692	0.0222528	FFC1_08117	FFUJ_03674	related to OrfH, unknown gene in trichothecene gene cluster	MGLLSLATTFLAFSSAASAASLAKRNSNSQKLTPAAQSLFDYSMQVSDSRYDSSYGYVWYQDNGQWSVRFTAWHIPGLLHRAKGDDVKTAVKAIENVLANQLNSDFDSAWYGTFKLSPDEPDPTPNGPLYPPSIYGTYDPNWREFVGTQLIQVVEEFGHLLPAGLESRIEDALEAAAIGGMRRNGSFPLDDNLILGYSNPGIMRALTTGWVGKRKNNKVLINFAKEQGNDLLKLFKRCGNALSEYNAPNYYGIDIWALAANIAYGPKDAPMTKNSVFILQELWKDVAAHYNPYLGNMVGPYDRAYSRDATTHSQILSMVLWGVYGRGVGGQPPLGETDLLYDIAQGAALALVMDVIAPTISKDAQAIIKSKGKWKGTRFIKKTIYEELDSSNPRHVTSW…	related to OrfH, unknown gene in trichothecene gene cluster
XLOC_010316	4.61621	16.9647	10.404	5.36028	6.38859	7.19126	7.56937	21.4671	1.28456	1.54135	1.54502	1.13756	5.64986	6.32335	7.53362	30.3626	FFC1_09295	FFUJ_03865	related to P. aeruginosa hyuA and hyuB	MSSQGIRIAIDRGGTFTDAWAEVPGRQEHIVFKILSVCPDEYDDAPTECIRQILEIALDTTIPKGSLLDLAPIESIRMGTTVATNALLERKGDRVAFLATKGFRDVLLIGNQARPDLFDLSVRRLKQLYETVVEIDERVTIEGASEAPSNGPIDVSSDPALVVGQTGEVVRIMKKPDLEVVRADLEELKAQGFKNLAIGLMHSYTYPDHELQVTKLAEEMGFKVSASSVLQSMAKYVPRSQSAVADAYLTPMTFAYLDGFRKNFKGQLEDESANKLLICQSDGGLTSWSKFTGLRGVLSGPAGGVVGLSRTCYDDADGTPVLGFDMGGTSTDVARYSGALEHIFENTLAEVTIQTPQLDINTVAAGGGSILSWENGLLKVGPSSAGANPGPACYGRGGP…	related to P. aeruginosa hyuA and hyuB
XLOC_009922	0	0.841526	0.915693	0.0467685	0	0	0	0	0.0345897	0.911601	0.148081	0.0821775	0	0.050284	0	0	FFC1_09448	FFUJ_03975	uncharacterized protein FFUJ_03975	MSFTAFNSYQLDTSDILDAPGIEPSNDYYQFSPFNTCQVPGMAQYGMNSAEDLQEVEESKSNARLKLGYKRASSACKQCRHRKIRCIASSSDAQARCVSCVRLKKECSSYLTGQSSTEGSSLVRIARFSPGPDPGLLPYNPARNSETVDRYLDGIKSSLNPSEIRPTPPVVPVSTGIPWTDGFAPDMRVSTVANPANLIMRSQSLPGKSGRVLGQDLNSNAAGFDSTQGAQLSEAPAMSQFSTLAEMSSPSTSSVSDSANPLFHPDFGIPWDSNSHALPMRFMPGLSDSANMGDMFIGGGGDVFDFNSGPGPSTNQPLPLQVNPVIQGRSQSLPYNGYAVNTYWE	uncharacterized protein FFUJ_03975
XLOC_010606	21.9003	58.9014	123.838	22.9613	14.5522	16.9109	18.9297	13.996	6.32858	21.3005	64.7045	6.96226	4.56313	3.22695	4.69135	3.12955	FFC1_09819	FFUJ_04335	uncharacterized protein FFUJ_04335	MEKAKQAVSSFLSNDGKHRTTVDEDVKPHVTQEHVMPHQHERVTTALDKEVHQEHHHTTVQPITHKETLPEQHHHNLIPVEHKTFHHGNEQDTRATLDREAAKYRDTTETYSTTHSTEAAPVVTGERIHHHVHEHVQPIINKETVQPHVVHTTIPIHETHHAAPVHHGTSTLPAKTLEEFTQERGGLKERAAQKLTEFEGCPKPYRRELQGEQLEGDKSMHLHGHGDNYGENQAFAGREGHGMGRNTEGLAAGAAAGAGAAAATRKHRHGIGHKDRRGSASSSSSLSSSDEESRGLGKSSKTKNRGLGSSTGTGVGAGAAAAAASAAHSHHQNREGAAAAPSTLEGNRGIGSNTGLQSGSGIPGTAGAGSGVESMGTTGNMSNFGSSNRGIGNTNTAGL…	uncharacterized protein FFB20_03227
XLOC_010127	14.176	52.2211	61.3691	26.8789	5.6156	6.24331	6.77462	4.78262	1.8959	22.6416	26.987	7.31915	5.50777	2.57373	2.84949	1.02963	FFC1_09820	FFUJ_04336	uncharacterized protein FFUJ_04336	MAGRLKNAIKKRASRLFHGADTSEGSESHSTSNKNSLAESSRNSQPRHRKSLSLLSRSSKTEKHNGPEASQAQPTVKLQNTGDFLAHPAIQPLKADPTPRTPKLERPRPSLEPDATGWCEGETAEDASYRKSQRYSTEPKYSQDTTYQTVRPNQAENTDELETMLSGLTVSPNESTLPEIDIDPLTPFDLVDETSPTQARLSQLAIGEERPKYAATHIKPLSQESDVNLESNSSQEGNIRQNLEAIHPRDAEFDRINEEVRAGTNSETNFHLQNSLDFDRTVHYQETVVHEHIRPHVHTIYEPKRTRSIHYHEHRTLIQPIKDPNPTILPEQHWLQDDKSGEIYRIPDELGKKLM	uncharacterized protein LW93_14147
XLOC_010198	31.1989	74.6016	104.173	41.4206	45.926	48.2634	47.5305	10.0643	14.1795	33.0706	5.44532	9.9696	34.4158	42.8892	26.58	6.60163	FFC1_09946	FFUJ_04459	probable 3-isopropylmalate dehydratase	MPAPVGNPQTLYDKVFSAHIVDEKLDGTILLYIDRHLVHEVTSPQAFEGLENAGRKVRRPDCTLATTDHNVPTTSRKALKDIASFIEEDDSRTQCVTLEENVKKFGVTYFGLGDKRQGIVHIIGPEQGFTLPGTTVVCGDSHTSTHGAFGALAFGIGTSEVEHVLATQCLITKRSKNMRIQIDGELAPGVSSKDVVLHAIGRIGTAGGTGAVIEFCGSVIRNLSMEARMSICNMSIEGGARAGMVAPDEITFEYLKGRPLAPKYGSETWNQAVAYWKSLQSDPGAKYDIDVFIDAKDIIPTITWGTSPEDVVPITGCVPDPETFSSESKKAAGRRMLEYMGLTAGTPMEEIPVDKVFIGSCTNARIEDLRAAANVVKGRKVADNIKRAMVVPGSGLVKA…	3-isopropylmalate dehydratase
XLOC_010685	101.364	364.791	232.203	108.921	63.5765	66.5031	58.4581	54.4807	34.556	66.4409	73.9155	25.4642	4.70308	6.82634	6.58152	6.70019	FFC1_09974	FFUJ_04484	probable osmotic sensitive-2 protein (putative mitogen-activated protein (MAP) kinase homolog)	MAEFVRAQIFGTTFEITSRYSDLQPVGMGAFGLVCSARDQLTNQNVAVKKIMKPFSTPVLAKRTYRELKLLKHLKHENVISLSDIFISPLEDIYFVTELLGTDLHRLLTSRPLEKQFIQYFLYQIMRGLKYVHSAGVVHRDLKPSNILVNENCDLKICDFGLARIQDPQMTGYVSTRYYRAPEIMLTWQKYDVEVDIWSAGCIFAEMLEGKPLFPGKDHVNQFSIITELLGTPPDDVINTIASENTLRFVKSLPKRERQPLRNKFKNADDSAIDLLERMLVFDPKKRITATEALSHDYLSPYHDPTDEPVAEEKFDWSFNDADLPVDTWKIMMYSEILDYHNVEAGVTNMEEPFNGQ	CMGC/MAPK/P38 protein kinase
XLOC_010735	23.5978	225.645	142.148	69.8569	30.5984	28.0107	27.3075	16.2079	9.32847	53.6673	52.9385	23.5285	7.93188	9.28693	9.02066	4.54474	FFC1_10047	FFUJ_04556	probable ferrochelatase	MALRRSGGQLCKSISQASSHRLALPQIATQKRFLATPVHPVTQDATGSKGPTAMVFLNMGGPSTTDEVGDFLSRLFADGDLIPLGPLQNYLGPLISKRRTPKIIKQYSAIGGGSPIRKWSEYQNAEMCKILDKISPETAPHKPYVAFRYADPLTEEMYEQLLKDGFGNGKGGRAVAFTQYPQYSCSTTGSSLNELWKWRHRLEGKTNKESGDGTITWSVIDRWPNHSGLVEAFAQNIEAKLAEYPEARRKDVVLLFSAHSLPMSVVNRGDPYPAEVAATVYAVMQRLGFSNPYRLCWQSQVGPSAWLGPQTSDSVEHYISKGQKDLVLIPIAFTSDHIETLYELDQEVIGDSGHPETVKRVESLNGSPVFIQALADIAKAHLAAGQACSKQMGLRCPGC…	probable ferrochelatase
XLOC_010751	0.305715	1.5361	0.813929	0.447697	3.23024	2.50592	2.0229	2.45997	0.243764	0.94954	0.655757	0.284126	0.45773	0.76891	0.0893264	1.36597	FFC1_10071	FFUJ_04580	uncharacterized protein FFUJ_04580	MKHLYGLSCIGLLGLAVLTTGKDVSYVTDLEIFTYLAPCVSSAISYNVGMQTYSTMCGDSETELQKCICSTRMDEVASSISTDIEYSCGSSATEDLSSASKLMQKYCNQEEHITFFSPTKNIVEAYITDLPELAYLPPCAQSGLSYAVANIGSSRCPEAAELNAPCVCNKKDVVRDITSTLRSAVKYSCSNNGDVTSAQNFYSEFCQMNDGTTSFAPPKGPPGDMSYYITAMPHFKSLNKCAQSGIASAVMEQSSWLCGDGPQELASCICIKSGMSKIISSSLTERVKDYCDSTHIANVTSAIDVFRYYCSAAESLVVATVSQSIFQSYPTASSGAGPKTTGPGMTGSAGATATSSSNTAKQSDPDHEDKEEDESKTSIAPIAGGVAGAVVVAALGAGL…	Uncharacterized protein Y057_6006
XLOC_014226	27.9855	68.3022	99.5604	33.363	2.94028	6.18242	7.25771	5.67118	5.07783	8.20737	25.1037	17.4143	1.79796	1.75369	6.70099	3.71028	FFC1_13086	FFUJ_04757	uncharacterized protein FFUJ_04757	MNSNNKSNNNPAGNVGETVGGGLNFLTSTVGNTVGGLGRTVGNVTGAATRGLGDTVTSATGDAGRPLGDGIGNLGTGVQGGLDSISKGVENAGQWKKQ	cytosceleton binding protein
XLOC_014164	0.160932	0.747534	1.51634	0.0349409	0.0190186	0.145996	0.233909	0.294243	0.0895904	0.649849	1.29069	0.0605194	0.0329413	0.119623	0.305018	0.257773	FFC1_13629	FFUJ_05280	related to 6-phosphogluconate dehydrogenase	MEITKVGIIGAGTMGGAVSLLFAEKGLDVSIVDTSRASLDKVAKNAEAAGLSKRIHICEDYDTLSQGLGSPKVFIFSLPNGRPGDSVVAQLKSRVSKGDILIDASNENYERTQARQEILRPLGVAYIGLGISGGSFGARYGPSLMPGGEKWAVEQVLPLLSRIAAKDDQGRPCVTNIGTGGSGHFVKMIHNGIEHGVMSSLCEAWEIMDKCLKMTGDEIGDVFDSWCERGELKGNFLVSISGPICRTRSPVDGGSLLHQIRDAVVQDANDSEGTGVWANIEAVASHVPAPSLTAAHYLRLASAEVEQRSAVKASIGTVFPQPFTITPEKRAHILEQLRQAVYVTSLACFIQGFDVMERKNRQEGWGVDMTRVLNIWRAGCIIKSDYIFDILDVAYAEGS…	related to 6-phosphogluconate dehydrogenase
XLOC_004878	2.32398	6.02716	9.11181	2.34895	0.139551	0.429501	0.527005	0.323485	1.33191	2.88564	6.22628	1.1308	0.0857292	0.390766	0.465946	0.0314481	FFC1_03883	FFUJ_05402	uncharacterized protein FFUJ_05402	MSSLGAKIKDILHSDKDTTTETSHHPPGSFPTEEMEPSETHEGYSKGYEHNKLHKADDPRGHAHKDSGVGFTEPNDPTSYKPSDEPISERRNDPLDRTTDTTTTAGTTTAGTTTAGTTTAGTTATGTTAAGGLGDTSKIPATEGATGATAPSTQDHPYWGDLPSGGVHNTVIGHGSPEDENARHRAVHSGATEPTRTAGTLESGTFLHRHDRDTTSSTTNPTDAQRSTQENPSQTSGSRFNEGLAGAGALGAHELEKRRHADDTQTPSKADQTTDKTHDEHKGRSFPLLGRDHKEKETHHKDKETHHKEDKHAKESKESKLGALFHRKDKTETEAKAEQEADQEKHGHSKPALAAAGAAWGASSAGKGHDDKTQRDVTDSSGTRGATQYPASGLDSTRD…	uncharacterized protein FFB20_05856
XLOC_004107	61.1002	136.09	235.364	73.1313	4.45155	6.50746	6.18458	7.43886	23.5219	84.257	190.116	34.1131	1.48804	2.4037	3.35713	7.10237	FFC1_03970	FFUJ_05482	related to calcium-binding protein caleosin	MDFDDPKNTKSYSDALKVDPNSIITTSIDAVPVTVERKPYQPGVDKPRLAHAGVARANLAATHERPEGTTENDWAQRHQDQTVLQQHCDFFDKDHDGVIWPIDTFRGFYQLGYGIILSVISVLVIHGNFSYPTQSSLLPDPFFRIHIDNIHKDKHGSDTGTYDTEGRFIPQKFEDIFSKYAEGRDYLTIWDVSNLMKGQRLIADPIGWGGAFFEWLATYILLWPDDGRMMKEDIRGIYDGSLFYKVAARRAPK	#N/A
XLOC_004934	21.7527	66.4901	67.027	84.5198	0.519543	0.541443	1.04826	1.73841	2.76518	14.6862	18.1066	30.6239	0.526894	0.37831	1.07995	0.444566	FFC1_04002	FFUJ_05514	uncharacterized protein FFUJ_05514	MCQVVEENGNKPQKESQSQNQNQNQNQSCGASSEATGSTQGLKPVDQPRYHVETFPIPAPLSEYDLDYRRTMTIESQQRLWPQDIWVHSPHGRQLYQPVLMFATAPEDKTETNGSASKSG	uncharacterized protein FFUJ_05514
XLOC_004157	84.1909	448.181	680.172	95.4516	14.3337	25.3909	24.0655	8.06505	64.5563	325.836	649.665	63.3963	10.7374	20.5321	10.0128	3.359	FFC1_04063	FFUJ_05570	uncharacterized protein FFUJ_05570	MSMNPESATPQQGEFRSKVAPAEPLATKGVSQSTSPEFSLATTPSPSSTPSNIPPAQPPPENTFQPNPETEVPAQAPGASGGVSASATLGGATSADVHTGLGKPAAGQTSQELHGREKKDRSGLTGVGANPSDPIHDMGADRDHPTNYRGKGGENAVDYPGAEDREPVKAEQVASERA	uncharacterized protein LW94_9711
XLOC_005055	0.913558	319.806	325.416	250.095	1.46118	2.64927	2.38006	2.80524	0.453508	34.5223	77.0993	27.4187	0.235163	2.16706	1.75794	1.61609	FFC1_04237	FFUJ_05732	related to deoxyribodipyrimidine photo-lyase	MAGNKLLVYLLRRDLRAIDNPILHHLATSDHGFTHLLPIYILPPHQIETSGFVAEGKKSPYPEARSQVGRFWRCGPVRAKFQAESIWDVKQNLEDISSGMLVRVGNFDNVLKHLIKSLHDEHQSVDTVWMTEEVSKEEVDDQNAVASVCSENNINFKLWQDEKYYIDDRDTGLDDPKELPDVFTTFRKTQEPLRERPRASLPRPQAGSLPPFPSSWALPQEPPFQIPDNYNDFEQRLLEPINSMVPDPPVYPEDARSAHPFKGGENPAWDRLYHLIKSGSMTTYQETRNGLLGIDYSTKLSAYLALGSISARCIHEELVKFEDGQEQSYSKAIGFGQGENEGTKAVRFELLWRDYMRLCTMKFGSRLFKLDGFKGASGKYDKKWKTALKEEADANQDPS…	related to deoxyribodipyrimidine photo-lyase
XLOC_005225	15.9503	430.538	452.334	395.837	6.72506	7.26594	6.53699	6.94734	1.23684	142.368	163.662	93.6638	1.06367	1.35824	2.30758	2.26392	FFC1_04568	FFUJ_06055	probable vivid PAS protein VVD	MASKTVPAMNPWEVNALNYEFPQEGSFNVDGTVNSAGTWRRVQDPVIYPGLYAPSGIDIMSILFRVMGRPNPQVVLGPVDCSVALVVCDMGQADAPVIYVSDSFSELTGYTAREVLGRNCRFLQAPPGHERSLDRKGTDKVASHRIRQAVCAGREIQIPVTNYKKYGQPFNNLLTIIPVPVDETGCRYCIGFLSEMD	probable vivid PAS protein VVD
XLOC_004464	5.43957	29.1361	17.118	14.2808	10.7002	8.48696	6.35751	7.31778	0.866945	6.49511	8.51395	5.02977	2.48701	0.627931	1.75657	2.25013	FFC1_04569	FFUJ_06056	related to DNA repair protein MMS21	MSRRAINRTGNSSTELPGYEPPACPLTDTARRKLHDLSNSRSTAAYQQQINESVRLLGFSVSDIHERLRMQREELSRLKLRREEKGTEKSEDELRLEAHLPELEERINTLTAASEQAIRDMIDRRAELEDEDAMFSELHDTASAEAAQQRQVDAQRSEQDDEQEPLGATSLLDLYKELRQKKDTEYTKMSAHQRYALNNDYAGFKKLWHDAMAGDEGPPLPDASRWFTADGEPIMTGDVKGAGAGVGDDDDDIAVEREVKSINCPLTLQPMKDPYTNRNCKHTFEKAALLEYLPMRGESQCPQAGCSQKFTRARFDHEFFQDQAMARRIKRVRLAQQQQEMMDEEDEGDGDDELRVRGSQAVPGRPLKREKRGE	related to DNA repair protein MMS21
XLOC_005295	4.14774	22.7127	28.9359	13.3146	3.1449	2.62165	2.53076	1.95971	1.19537	2.01412	5.99346	3.11374	0.829947	0.560391	0.55329	0.485743	FFC1_04679	FFUJ_06163	uncharacterized protein FFUJ_06163	MIARTLRKRKVVSREQMPSKKMKTGRKTKHQVEDECLDDLPHNLGPAPAPRKDIETIPTPPENLKETQDLEKNAKVEEVSPVAKSGMKAAKQGSTQTTESATRRSLRPRKSTSTSKSSYFESDDETITTPQVKLSSVKKEVKDEDLQMAIEAPVRKTVKKTKDNPYGLTPGLTPFPEWNAPSAEECEVVYRRLAKIHGEAKAPEKIPAPSLEVSGCGEVPSVLDALIRTRLSANTSNRNSSAAFRGLVTTFGTVDKGIGKGSVDWNKVRVAPLPTIVESIKTGGLAQVKGKDIKAILELVHEENTKRREAFMQEKKGGNLSGIAGAGNKTQGQKDLEILKTDQDILSLDHIHGMAPDEAMQTLTKFPGIGVKTASCVILFCLQQPSFAVDTHVHRISGW…	amidophosphoribosyltransferase
XLOC_004618	1.10274	4.02871	3.40189	3.47689	25.1936	19.372	27.196	35.1555	0.077758	0.806202	0.207985	0.187101	6.77543	4.94056	6.46876	10.3871	FFC1_04872	FFUJ_06338	related to ABC1 transport protein	MAEKDLGKAEEAIAANHHTEQADPAYRNSIDTDSTRHGPAEQNNGGVSIEQAEAEFAELQREFTGVSRASRRKSRASVGDPEKNTHAEDNEVESIFDLEAALRGGLDREREVGIKSKHIGVYWNDLTVKGYGGMSNFVPTFPDAFVNFFDVITPVIRMLGLGPKPEQVALLDRFKGVCKPGEMVLVLGKPGSGCTTFLKTIANQRWGYTAVEGEVLYGKWKNTEFDQYRGEAVYSAEDDIHHPTLTVEQTLGFALDTKMPKLRPGNMSKQEFKESVITTLLKMFNIEHTRHTIVGDHFVRGVSGGERKRVSIAEAMICSGAVFSWDNSTRGLDASTALDFAKSLRIQTNLYKTTTFVSLYQASENIYNLFDKVMVIDGGKEVYFGPAASARSYFESLGF…	related to ABC1 transport protein
XLOC_005558	0.149925	1.49582	0.174983	0	0.185171	0.228977	0.117478	0.0480759	0.097394	1.48471	0.171153	0	0.076997	0.182743	0.102033	0.0543045	FFC1_05171	FFUJ_06621	probable UGA2-succinate semialdehyde dehydrogenase	MTRSFPFKLDDPSLLHEESLLNGQWVQAQSGKRFDVEDPGSGQIWATSPTNEVCDVDKYVESSDAAFQSYRHINPRQRAKILLKWHELITNARQDIAKIVVFETGKPMAEALGEVDYALGFAWWFAGEAERIRGSIAQPSISDRRTFVIKQPIGVCVALVPWNFPVAMIIRKVSAALAAGCSMIVKPSPETPFSVMALADLALRAGLPPGVLNVISTDNANTPSVSETLCKHPLVRKVTFTGSTSVGSIVARHCSYGLKKVTMELGGNCPFIIFNDGNLEQAVSALMILKWRTAGQACTHANRVYVQSGVYDKFAQMMAEATSKLRVGHGADSSSTMGPLTTSRGVDKVKKHVEDAVSKGGKILCGGKQPENLNGYFFEPTIISGMTSDMLTTQEEIFG…	probable UGA2-succinate semialdehyde dehydrogenase
XLOC_003201	1.10668	4.37018	5.72825	1.43854	0.861447	1.20111	1.46113	3.35105	0.178105	0.928309	2.79635	0.217861	0.241889	0.625473	1.07939	3.36735	FFC1_02241	FFUJ_06723	related to transcriptional activator Mut3p	MGRKMGIPSLMNRNSRSWTSKLRKMNNRGDRRRRLAKACDHCRKGKVRCDGTRPVCGRCRGCGNDCHYADVDKPDPRQRRSKISSRSSTGDTIDGVCLQRVNASSTLLSDSVVVQTVPHPQQHVEAHHELHSFTQSSPGQTLTATDTSPRDTIVGGNEDMRYFGPPSGISLVSTATPRKSGQHTPESWSKWTHPSIEPLFTKRVMKPLPSWTEAFSLVSEFFTHEHQVFPCFNAPAFMCLLGQQYSGTYTESPAWWVSLNSVFALAQRRRAEAAQSAEAEDLAWAYASNALAGTWDVLMRSTQLSSVQALLAIAWFFIGTPNPQPSFMLVGCAVRLAHSIGIHVESQDPSVSPAEGSMRKKVFWIAICLDRELCLRTGRPPCHDLNAAYVDPPMGSLNE…	related to transcriptional activator Mut3p
XLOC_003202	0.0101778	0.318487	0.866859	0	0	0	0	0	0	0.176148	0.419447	0	0	0	0	0	FFC1_02242	FFUJ_06724	related to DUF1446 domain protein	MASNNEWRAGEFGIRPVRVANCSGYHGDPAIEMYKQATLGDVDFITGDYLAEVNMANNAEAYAKGQHPGYEATALKGLELSIDAISKNRIKVAINGGALNPEGLAVKVAALVAEKGYDLKVAYVSGDNVLPKLGKHMPQNRETALAHLDSLNDHVTLTPETYIFAKGGDDPREIVSANAYLGAHAIYEAFQHGADIIICGRASDASPVIACAWYWWSWSSTNYNELAGALVAGHLIECSAYVTGGNFAGFDAFDPETFVDPGFPIAEIAQDGSCVITKHEGTGGMVTVDTCKSQLVYELQGDVYINSDVKAYLEDIEMEQLGQDRVRVHGVRGAPPPDTTKLALFYKGGYEMQALFNATGHNFEQKFALLEKQVRFHLGEEKLSHVDFLEFQRIGVPAV…	related to DUF1446 domain protein
XLOC_002369	0.0383125	0.407966	0.600953	0.016439	0.0738788	0.137389	0.0942731	0.0140793	0.0367397	0.312256	0.42797	0.0284732	0.0651545	0.244971	0.163286	0.0473783	FFC1_02243	FFUJ_06725	related to acyl-CoA transferases/carnitine dehydratase	MSNYSISTEATRILHKVLLQDPRLQLPDSFVKAAEKVKFVGEDDQPFILTPLKITESSAALNALVATAANVVAAERYGIKYQNLEINTDLATLFLESVLLPTIGGKHFTQNTKMLAELAKMDLHQMSKPVRRYATNVYRTKDGRWYHLHGSMNALPTMEMLGVEDCDISTEEAFETYVKKVAQWDSSDIEKVANEKYKQAGVICYTPDEFFASEHGKIMSEEPLWASTRVPAPKKPWPEAKDSRSYSPLAGIRVLDLSRVIAAPAVSKILSVLGADVIRVSCSRLPEYAATMPDLQTGKRDVDIDLKTTEGRQTLSELIKDADVLVDGYRPGALAKLGFDSKSLRELSPSLVYMRENCYGFKGPLSNRSGWQQISDCLVGLSYLQGKFLGLDEAVVPLF…	related to acyl-CoA transferases/carnitine dehydratase
XLOC_003205	0.0987431	0.80402	1.60876	0.303664	0	0.0401645	0.0496078	0.023892	0.0429946	0.892739	0.356939	0.209602	0	0.0358075	0.0859235	0.0413824	FFC1_02249	FFUJ_06731	uncharacterized protein FFUJ_06731	MKLQFLMLGLGASFALKSVHAASDSNATPYLPIPTKAPKTWVHPGVFVSGPQLNYIAKRIKARENPWTEALDSMLNMTYMSPTRTAEPYETVQCGPTSTPNIGCYQEREDSMAAYMNALAWWITKDKHYAEKSIHYMDAWSSTIQAHNNSNAPLQTAWSAANWVRAGEIMRSSYKHWSKKGIKMFSDMLRHAYLPMIEDGAPRKNGNWELVMIESTIGAAVFLEDAALYEKALGLFSARVPAYIYLTSDGEYPVQGRGGINTTAEIIKYWYNQKTFPISGITQETCRDFAHTSFGISSISHIAETMRIQGMDVWRSTDVGARVKAALELHTALDSKQKPVPKWLCNGTIPDTMNPMLEPAYNALAFNLGHKMPFTKKVLLSQRPAGISEPPLFIGVETL…	uncharacterized protein FFUJ_06731
XLOC_003325	0.257917	3.68033	3.8537	0.318046	0.314496	0.281385	0.225934	0.338216	0.252314	3.23525	1.51619	0.103209	0.366204	0.217791	0.186909	0.508894	FFC1_02494	FFUJ_06962	probable maltase	MAISKRVWWKDAVVYQIWPSSFKDGNGDGLGDLQGIIESLDHIQSLGADVIWISPVYESPQVDQGYDVSSYERIHPPYGTMEDMTNLLKCCHERGLRVLMDLVINHTSDQHDWFKESRSSKGSPKRDWYIWRPARYENGQRKPPNNWKSCFGGSAWEWDPCTEEYYLHLFAVGQPDINWANVAMRKHVYQSSVKFWLDKGVDGFRIDTMGLFGKDQSFADAPDSDPCAPFNHQPDAFQVLGEIHELIAGYGDLMTVGEFGGLGDTATALRYVSASANRVNMGFQFETVCLGFALSSFDIKPHSLADFKQSVIKWQQYTEGTDGWATMFLENHDVPRSISRFASDKPELRAAAAKTLALLQIACSGTLFLYQGQEIGMTNIPKSWAIEEYKDFSTQQYWQ…	probable maltase
XLOC_002628	130.788	333.367	724.264	205.716	218.52	263.421	389.064	312.412	24.6206	75.8775	228.316	93.7722	12.7736	58.6608	104.923	81.5991	FFC1_02742	FFUJ_07199	uncharacterized protein FFUJ_07199	MSKSRTPLILGGAAVSGIGYYLYAAGGNPRAAEKKAESDAHSVAADIKSHLPGRSPNAEGELKGAGAAAGAKIDSVAAEADRQAGVIKSNVESVAKDAKAEAMRVVDKFDHRVEAEAAKAKGGISSWFGGGK	calcofluor white hypersensitive protein
XLOC_003553	0.871402	2.5002	7.95095	1.01252	0.938573	1.43191	1.01914	1.34124	0.0783001	0.952639	3.69036	0.375903	0.723832	1.09606	0.842811	0.42268	FFC1_02904	FFUJ_07351	related to mfs-multidrug-resistance transporter	MAPIHRIFSSANNKPYRTKQLEEENPPYLNEDGYVDFAPGDIQNPQNWSTVRRWSVTFSAVLLVLNATFASTSPSGCFPSISEHFHVSELVAGLTITLFLLGYCAGPLIFAPLSELYGRRWIFYITFTLYLIFNFLNAPGVLADLWTPIERGNAMAGFSAMVWVGPALGPVIAGFLELKKDWRWSFYVLLWLGGATALVMLTIPETHAPTILLKKARRIRKAKIPGYENVKARSEEGDRTLKTVYRIALTRPWIILFDTISFLCAVYMSVVYTLLYMLFSIYPIVFQQRRGWNPGVGELPLIGTVIGAFIGGGIVLIDTRIRKKKIENGDKQMEPEDRLPLAMIGGVGFAVTMFWFAWTAEYNSIHWIVPTLAGTFLATSLMLIFVAFLTYLVDVYLMY…	related to mfs-multidrug-resistance transporter
XLOC_003580	137.634	471.908	633.796	115.432	3.59778	5.57657	7.029	5.51965	16.2756	52.1963	86.378	48.5859	1.69581	0.847604	0.980318	0.911533	FFC1_02952	FFUJ_07396	related to mismatched base pair and cruciform dna recognition protein	MSDTPQPSTLKSVVDSASGAVQSAIGSLTGNTSDQAAGDLKKQKAEAEHDASHATAKLPGVTLSGSGAAAKDDPNRTEGSWNQTAGSAKEAVGGIIGSESLKKAGHEQNLEGRNQEAKGQLSDLGTGISDRAQGTVGGAVSNLIGNKEQEAHYDELRAEGKTRQRGVEHDIQKQAEAESRE	related to mismatched base pair and cruciform dna recognition protein
XLOC_002770	294.532	1066.41	1702.46	270.764	42.2639	41.4648	45.6564	45.3712	83.819	288.716	543.001	79.9232	6.29532	6.63099	4.10784	3.8699	FFC1_03014	FFUJ_07454	uncharacterized protein FFUJ_07454	MSGLINKVKDAIHSDKDKSHEHPTGDHRANHGTTTTGGLGSSTHNTGTAGGLTGGSTYSENMPGHTTGRTENLPGHTTAGGLGSHSSGLPEGTTGPHGSRLANAADPKVDSDLDGSRRVGGSNTYGQTATGTSGLSSHGAGAHGGIGGTSAGYSTGPGNTAGPHSSDMANKLDPKVDSDLDGSRRLGGSNTHGHQGGLGGSTGTYGQTTTGTSGFSSHGAGAHGPTGTHTGTHTGTHTGLGGTGSTGTYGSTAGTGPGPAPKTAGPHSSDMANKLDPRVDSDLDGSKTVGQEKTFQRSNNNFAGRDPTDATQVPPSVLQKHVPTEIAHDDPHSDHSRRHSSTHQETHRGL	uncharacterized protein FPRO_08028
XLOC_002806	9.42915	194.387	85.7482	29.7826	14.5713	11.5883	12.1456	13.0654	4.66019	36.6003	24.4457	8.58828	5.88692	3.29903	1.97321	3.0278	FFC1_03075	FFUJ_07515	related to arabinose 5-phosphate isomerase	MASLSQPGHGPVQTSAVVVLGASSCLAIPPPSPPTPSSSPPGDTFCEPIDPLSLERELRGDSPIKDQRLREGVHVLNTEALALRNLSRLYETDSVARDGFNLSVQAITKQQRANGKLVVIGVGKSGHIGQKLVATFKSLAIHAVFLHPTEALHGDLGIIGPNDTLLFITYSGKTQELLIMLPHIDESLPTILLTSHTSPETCEFISHRPNTILLPAPIPEPEKISFGVSAPTTSTTVALALGDAIAVTAAKEINASIAAVFAKNHPGGAIGAAARQPRTIKDIAVSWHDIPIAPESEGVSLGFDLLRAGLDSVTGWVRVQDGVASPGTIRKISRDDLNKSLEEIPDASIPKALMLSLSSETTIRQARDILKNMQLSPNDKNLECERESAIAVMESEEIV…	related to arabinose 5-phosphate isomerase
XLOC_002855	37.241	115.94	132.379	17.1009	7.69132	18.7578	8.62659	7.83643	10.3702	13.2618	47.5538	3.11846	0.712229	8.1574	1.46389	2.80396	FFC1_03162	FFUJ_07599	related to acyl-CoA cholesterol acyltransferase	MVSSTAPGRSPLSGRSTGQPAPELQRPAPRSLGEALRAAGMTIDGPSPGLGSETPSEEDYDENVRPTLTEPSGVRHRYAHRVQPRPETISLSGTDFEKLQQEPGLSFKRRDSGIHLVLDEDNSLQRLLKTSSEWSQELTGPKQRQRKFADLVFTSQFSAFDRHSPSASNSPFHGFYTLFWLAVTLFVFKISVQNWQVYGNPLGTNEIVQTMFHRDVVVLLLSDGIMCALTAVTWMIQRLVSANYLNWDGAGWVIQNMWQTAFLAGVVGLTLWRDWPWTHTVFFVLHGIVMLMKQHSYAFYNGHLSTVYKQRAKIMKKLRQLDLVDPAMTPSQTEPPASAISTQHLSVTPSAEERRKSISAQPGQEESDIDKISRAIASHQPLDDEQIALFERIMKWEVD…	sterol O-acyltransferase
XLOC_002890	18.9113	44.6578	61.2163	35.5962	38.0483	40.3838	46.5882	163.312	4.47513	5.11883	4.6198	5.30675	13.1185	5.39565	15.8526	178.106	FFC1_03224	FFUJ_07659	related to the plant PR-1 class of pathogen related proteins	MKNLLFPLTALLVGPSLAADVTITAPVSIPSNEPEYKEGKSFTSAVLNSTNFYRQEHNATALNWNKTLEEFATDYLDDNDDCDFEHSGGPYGENLAIGYPNVTASIEAWGDERDEYNFDKAKFSKKTGHFTQLVWKDTTTVGCGRKLCGERGWFLVCEYWPRGNVEGQFKEEVSKEEGGAFSTRPGLGLALALFIGYMLVFV	related to the plant PR-1 class of pathogen related proteins
XLOC_003808	357.996	1157.79	1364.13	377.453	258.596	355.408	420.603	223.561	99.8854	217.264	327.858	35.8796	175.064	248.466	273.061	93.2974	FFC1_03399	FFUJ_07825	uncharacterized protein FFUJ_07825	MPGAPDVNKPTDIKTKEADVNRKLQVYGIISAFQNGKVPSNDQIDVALSSFLASRALSGRHEKLSAEGQELVKDAANAIKQAKHLLLSKNEGNLIQDFIWQTTQFDPKSVNTPNAPISKDAAKQDGDQALEGLRTLGQLLITNGQFRKLLSDATVLFRDMAGDAATNAAARVRPSQEQLRQIDEPAQDNVWHEAPDFSKDTLKQQAKGFYSGNPKEDAKDVASAGINAAAPGQLQQNQQSNAQQGTYPQVTTGTETGNVPASSDAARGAARQTDPQAGKSAAKQAAEAKIDNKIDPETKENILQRNEEYRRKARNYFDKKMPQERKDQTIWRLKKMILECQQHEDYSQAIQTLLRLAENYSRHGRTLGQGSTDTAKEARGGLAAAERDLRTIIERFANG…	uncharacterized protein LW93_12912
XLOC_015469	11.4937	34.3777	45.0253	16.6622	5.8343	6.31381	7.5657	7.08726	2.35565	3.39207	12.9985	5.30085	0.85384	1.18204	3.24324	4.57545	FFC1_14776	FFUJ_08451	uncharacterized protein FFUJ_08451	MVKAAFLGLLPAVMAIPAAAPGPAPTVYRREAIPVPAAQPTHIMDHERRDIIGDVETYVGSLVSGVETKIKGWVNSGILDFPTGFPTGDAVKKSAGVDDDDLKAEPTQVLNIPPYGNWTNKGWNVRVHGNVYKIPNLSQEKVDDLANVFLIDTSVDKLSKSQQAQARNVTRSIFVVQQDNVEVKMNFVNNVDVSPDESGGAIDARGGSQNITMPYNTTLEGDFDAFVVLKNTTGPNNGYLIPGNETSKIQTLNVYAEGKNNSGNATAYLVPPKGITIVSDIDDILRVTKIYEPKEGLLNTFARPFTPWMNMPDIYANWSSSVKDLHFHYLTTTPEQATRNYMSFIYNTYPLGSFDTRPLNFSDVSATLSIRRFLLDKVFQTFPDRKFILVADTSNSDVM…	uncharacterized protein Y057_701
XLOC_015149	3.9049	7.26762	13.0715	5.46443	12.9557	12.6091	12.6599	6.7912	1.41675	2.85463	2.52775	0.890804	6.47367	5.89049	4.84523	4.20323	FFC1_14112	FFUJ_08734	uncharacterized protein FFUJ_08734	MTDFRQWALEFVLADNEGQQTAIANKAANEIQTAAANTNPVARWVEAVQPWMPGGGNEAENETPDWTARAKALEFLSRTLDFLSSDILKPSQVKLLVSFFGAMFEVDHKAGIMPSASALSRIVAMKSFQRHMGHDIIQKVCSLKDDFPRQVSKTRLEIYELIRLLMTTPGVASDLQNTHGSSAGFMLDLIQLCRSERDPECLMVWFDILRLFMSEYTVSQDVLEEVYGVFKPYFPISLPRASQVAITPEELKLALRKCFSANHLLADKVFPFLLGKLDQGDAVTVNVKLDILKTMQACLDEYSHPQKAIAPYANQIWGSLKYEVRNGEIEDTIWGTLEVLKSLTRRLTGDSLRDYTLSVTRDCVPDLATTMYASSAGRLMVSVLSSKPSAFVLMAAPVI…	uncharacterized protein FFUJ_08734
XLOC_014688	2.36578	4.52423	8.50774	2.30627	0.252712	0.348585	0.624519	0.364325	1.85246	2.42158	8.24486	1.16438	0.37214	0.207159	0.132869	0.29065	FFC1_13910	FFUJ_08931	related to short-chain alcohol dehydrogenase	MSQAGKDGSFDPVPEAQAQKLPGTEKDMNPTSESTKLEGKNEFHEYRAANKLEGAKALITGGDSGIGRSVAVLFAREGADVTIVYLPEEQEDAEETKRMVEKEGHKCLLFPGNLMDNETCKNAVQKHVDEYGKIDVLVNNAGKQSMCEDFKDIDLDDVESTFRSNILQIFAMTKYALHHMEKGGSIINSTSTVAFRGTAHMVDYASTKGAITSFTQSLSKQLVKKGIRVNAVAPGPVHTPLQPASRPAEQMEGFGKNSQLGRVGQPSEIAPSYVFLASKDATLFHGQVLHAYPLGD	related to short-chain alcohol dehydrogenase
XLOC_009750	0.765703	1.49904	2.63391	0.772596	0.374279	0.585997	0.459267	0.64778	0.415533	0.531853	0.688952	0.48107	0.052011	0.143315	0.0502691	0.3975	FFC1_09095	FFUJ_09299	related to monoamine oxidase N	MPTSKEGYLWTSNGLTTGLETDSVINGTPESALLDKYDVAVIGTGFAGLIAARNISLTTSKVLLVEGRDRIGGRTWTAKALGEEFEMGGTWVHWGQPHVYSEIHRYNLQGNLKTSAGTADAKYTAYTASFAGPSKLDTKETNQTVQRVADAFFDIDGLTSYDLMPYPHDPLREPVLWKKYEHLSAKDRLDQLSIPQVEKDMFDAMISSFGSVPGSQCGFVEVLRWYALGGHSMAGVFERAGLCKLGNGGMTSLALSILSEYRGHLLFNTVVEKVDQNGNGVTLTTKNCRRIEAKYVISTIPLNCLSDISFNPPLSPLRQEAVKAGHINQGAKIHFKLKQTEPGWFAMASGYGRSPWCFAFSDHNGNTNKNNGTYCIGFGYGGHLTDPQASEDISASFKE…	related to monoamine oxidase N
XLOC_009031	2.46957	9.33655	3.52791	1.68311	1.5755	0.759806	1.60894	1.43126	1.45951	3.59476	0.936651	1.02231	0.6199	0.690886	2.15048	1.35418	FFC1_08852	FFUJ_09534	probable cytochrome P450 51 (eburicol 14 alpha-demethylase)	MFPLLYYPLWAFVSCLVIITVNVLYQKLPRNANEPPLVFHWFPFFGNAVAYGLDPYGFFMKCREKHGDVFTFILFGRKVVACLGVDGNDFVLNSRLQDANAEEIYGPLTTPVFGSDVVYDCPNSKLMEQKKFVKFGLTQKALESHVQLIEREVLEYIQAVPSFSGMSGTVDVSKAMAEITIFTAARSLQGEEVRRKLTAEFADLYHDLDQGFTPVNFLFPWLPLPRNRRRDAAHAKMRETYMDIINERRKGGGDLEKGTDMIANLMNCEYKNGQAIPDKEIAHMMITLLMAGQHSSSSASSWIILHLASSPDIAEELYLEQLINLGAGGVLPPLRYSDLDKLPLLQNVVKETLRVHSSIHSIMRKVKRPMQALGSPYTITTDKVLLAAPIVTALSEEYF…	cytochrome P450, family 51 (sterol 14-demethylase)
XLOC_008869	55.2106	174.577	232.879	209.565	412.466	436.206	477.725	458.203	11.7061	32.9858	62.0772	54.132	2.44473	68.2574	56.5217	96.5855	FFC1_08520	FFUJ_09849	uncharacterized protein FFUJ_09849	MSRGNQRDTDRAKNDKKRREEAERKKAKSKTGTKLQQEKESDAEKMRRKQAASDARKAAAGAVGKK	uncharacterized protein FFUJ_09849
XLOC_009297	2.23758	8.39156	5.00502	3.6929	0.477322	0.5647	0.377717	0.157846	0.710111	0.964251	0.922639	1.47112	0.155349	0.352642	0.103881	0.161191	FFC1_08319	FFUJ_10045	uncharacterized protein FFUJ_10045	MESHSFLKSLITPELLMQLAEAYLPYSKTEDLDFTIAQSDAFSANFKKVCQESKARDALIALSHLSHNGILPTPMELDLMSLLPEPSSPDFPQQCFGLQLLLDQASRILLTGIEARWQVAYFGPLARRLTGQWYALPHHLRPHSWQRWKDDVGVTSFSFWVSTQVMWAAPFLHAEDLGSQEIGLELSNDLRQAVEEYTGTKDPHRETRHKILKDDLLFIREVVKSPPKDDEGAISMAAWTYWWCMILDAHWPIIARFSRYPYRNAAFGRPSTKQEEKWLDDINHFSEASPEDAKRIQEDVEKGRWTPLGES	uncharacterized protein FFUJ_10045
XLOC_009234	14.3363	39.4195	51.2239	12.0083	43.8915	83.5232	47.51	30.3261	6.09022	16.164	22.2624	3.73613	31.5002	47.8615	37.2971	18.5209	FFC1_08194	FFUJ_10166	uncharacterized protein FFUJ_10166	MSTTTLDASSPSAYGPSETALLLLDWYTLFIEKVAGPTAEPALKVAVELRNWAKAHNITVVHCLIDANGTPFPACKGVDRFQGLLQVMKTLEEPEPAELRADDNDELTFHRVPGHISALKSPGLLDYLKKKGIKSLVLSGLSTSGCVLRTAVTASDAEFATTVISDACADGDEELHQVILDKIIPSRGHVKSAAEFQEDFKGAQSV	uncharacterized protein FFUJ_10166
XLOC_011261	19.42	44.0435	65.4459	42.3325	5.11965	5.52704	5.93169	7.21548	11.3356	18.7068	25.9178	7.28978	0.711093	0.328171	1.34298	1.79956	FFC1_11036	FFUJ_10344	uncharacterized protein FFUJ_10344	MDFSCHVRINNESSEDLLLEDSGLDSGNWPLRQPLNVIEAGTQQTIYLAQPSWGGSKAWVTYEARYGQGWRNFTLEFECPAMPLSKNHVKVKDCSRVFEIDVTDVQERGSPLTANVTIRMDSKKSMVTKNDDIRANYDIGVGVSFPTKMDIKFPVHESIVIAAFIESDMTFPRGTVYNNINDKQWEYFRGVVWNDDPSCLLFEDVTEDNRMFGLGVEWLNAFKFGDEKCMTKRSHMGDLQFFHGMGSVMGEKPQKTRKNILTWMEVMYKLACGDQGISEDDTLDDVLPGFFTKDTVPSKSDTLRDLILATTPKYKDADIRKRAFGICLHMISDSYALGHTQRRLRNPSDLIERDTAGYIRFKPDTYGDWGSILCFHTYNDQDGDRHSHYDDKDGEQDPA…	uncharacterized protein Y057_7602
XLOC_011244	0.494989	2.34998	2.91506	1.83047	0.00801609	0	0.00844562	0.0392591	0.140315	0.117942	0.662708	0.274677	0.0138843	0	0.0146283	0.0393363	FFC1_11012	FFUJ_10367	related to sensory transduction histidine kinase	MDSEIAHDLDKLNIRDILNADSRPTFIIDLDPDDETPLRSKAIQPVFCNSALATHERLLDAVRGEQSESEYGDFKTWATGVTKQDDSKDVFPLFFLYKGLLWTGSTVGKRWRLISGNRLWQHPDTPASLSSSALSRASTPSLKEQDTPKGDFSKTPKQDEAKDETAEDMTHEMTPTEATLIASTPRKFPFRSWWRASTSKGSSDRNTGSTSSGSIILGKPEKAVADWTATNPKGLLSPYIRLLRAIDWSSTPLGPMSSWSPELRQVANLVINNPHPANIFWGNDMTMLYNEAYAVAFAGNKHPSMLGTGASGPWSEAWDVLGPALQEVVRTGVSFRSDNNDLALFRRGFLEETHICWSLTPLYGGTERIVGFYNAPFETTDLVLSQRRMGTINKVSESL…	related to sensory transduction histidine kinase
XLOC_013172	15.5498	30.287	58.8439	20.0748	0.929892	0.711863	0.982191	0.843105	3.29197	4.62227	23.3573	4.05523	0.27809	0.252464	0.41317	0.411237	FFC1_12702	FFUJ_11472	probable catalase isozyme P	MQPDIPYRQSHQQAPDEWKLEQGLEPARLGIRNQSSIQINTEPHRLNPNDHEELKGSDIPEDPDLDVQDERPGWKGYVEWEDYPEKKAKAHQRFSRFTFPPPPEFQLEPLPSTNPVLEGKRWKLWHKAIGGILDQVPRISWETVLKEKHPEMLHLLEFPYNGEAPKSLLTRDYIMPNELHFVRNHGGIPDIEASAYDIRLDGLVNDPKTLTLADLQDESLFPRISKLVTIQCSGTRRFEQIVEYPGEGDEMINAPWAEGAIGTAKWTGVSLKKVIKYCGGLKDGAKHLELYGADTYFKGGQCMNYVVSVPWSKVKANEVMLAWEMNDKPLPKIHGFPLRAVVFGYIGARSCKWLYRIKAIEKPSLAPVQSREYLYFQQQTGKHNQLPTMGIQIQEMPVS…	related to nitrate reductase [NADPH]
XLOC_013672	0.323869	0.99776	1.30148	0.403073	0.270718	0.538615	0.954266	0.654863	0.18114	0.293035	0.339988	0.18485	0.151527	0.198407	0.409813	0.315847	FFC1_12699	FFUJ_11475	uncharacterized protein FFUJ_11475	MAPFQAQQFRQGFVVTLNTLRLMDPRTIAFQIFRLPSPGDLVRNALKERQGLLDRQQWNNRVRLGPGTEHSEVHDIAFTGESRWQTLENPDATLQSSQSIRLTVKEEGSSGPEDTFPVAMGLMELSKQWQQADPNASYHVTTYETEHPVKTTRFIKVSENAQNKSVCITCHTYAREQPNANDFSEFHSAKQITEEIQSLDTSYITVRSEDNWKQVFLLQFHHACLKLFIQFLNFLEKDEIDHAEYAVTDPSKAELRQWNLKTIVKRSYEYRDLAEMGRKFISTTEYLLDVTNLSFPAPNSQVPNSPLPGHNFKATEIELRFLFQEANEQLKKFSDRLDRDLKYLELARNFNQNRSVQQLTLLATVFLPLSLAAGILSMQTRFKDLGVLLYDFFGVVVLL…	uncharacterized protein Y057_11035
XLOC_013622	4.12719	52.8954	72.5929	12.4755	0.04547	0.142959	0.440541	0.139511	0.963299	11.3919	19.3617	3.67058	0.040538	0.170572	0.517998	0.134034	FFC1_12604	FFUJ_11562	related to PHO11-secreted acid phosphatase	MARQNTLSKALVGLLPFASAASLNSEYTFNPLHHLAGIAPYFEPQDPPASPDAPQGCTPERAAYLVRHAAIYANDFDFEEYIEPFIEKVQNKTKIDWSKIPYLNFLDDWEPPISDAEVSLLTNVGRLEATRLGVDLEFRYPEFKQPKKVWTSSAERTVKSAQSFVRGLESDDKSIKVESIYESEESGADSLTPYKACPAYDGSTGSDEAEIYQKKYAKPIVDRFNALASDFNFTVNDIFGMQQLCGYETVTRGKSPFCNLELFTPDDWLGWEYSEDVRYHYNAGYGNQISGYVGMPWLNTTAGLLLGDDSDEELYVSFTHRELPPMVLVAMGLFNNSEPAGTESQINDTMPLSKINYRRAWKSSHVLPFLSNIAIERLNCTNTYGYEDGEYYRVLVNSA…	related to PHO11-secreted acid phosphatase
XLOC_013068	7.45032	28.6753	17.6123	9.50147	4.71763	5.79181	9.18181	9.45244	2.22448	7.29866	1.80506	1.31575	0.202662	1.08335	3.30083	4.80286	FFC1_12504	FFUJ_11658	uncharacterized protein FFUJ_11658	MNRSCVSCATSKVRCDLDKKGFPCSRCQQKNSTCVKAGRKKRTRKTTPSIVSSNPSPQESVQQNEPQPLIEQNVDFSFFDTSSFGEIDFLSQLVDIESMVDMSSWTWSPSDMASPIGENILTDNHVLWAGMRTNDGFICPDNFRLPADFLLDLDGPETIPVHRLETLARLFFSHFHPSLPLLHIPTFCLASSSSVLKRAICFIGAGFDRSPTSTAEAKLLYGSLPSQLAKLCLRSNGSSPNFQDLQALVLLQFAAMANGGSAERAASRLIHPLLVAAIRHEGLLKVHGECTKATRNAQFWTSWIQKESNKRVLWGVYAVDCYQSILCGSKPILSPTDTRASFPCDDASWTACSASLWATLPAQDPSSCFLSSVKGLMVGHAPAETNLTAFGMNLLILAV…	Zinc finger protein zas1
XLOC_013565	12.2243	53.6244	28.3382	10.0964	0.574486	1.10968	2.61411	3.17158	5.38421	23.9903	8.46672	1.37816	0.082095	0.26687	2.04164	2.47565	FFC1_12503	FFUJ_11659	related to dityrosine transporter	MSDTASNEKPKQFYQTWFDRFCFVSRREDPTTHSTWQKHAIVAITTLSAFTAPFASCILFPSFTTLVDYFHTTETKVALTTTVFLLGLAIAPLWWSTLSQQYGRRPALVSSFLISTVAVIVCAVSNSLPLIIVFRLIEAMGCSSAQSVGAGVISDIYISTERGSALGWFYLGTLIGPLVAPIIGGALQVWLGWRANLYFMAIFTFVAAMLTLLVLPETLVKSSTEQPKPWHQVLERDALAPLPKLKFLMVPSIALTIAYVSICFASLYCFNTTLPYAYAAAPYNFSAIEIGLCYISNCLGYAIGSVVGGKLSDAKLRQYQITHDGAIRPIERIKTVWYGVGFIPAGLIIYGWLIEKKVFWIAPLVGAFLFGLGLMLVTATVMPFLVDIKPGVGASVVAD…	related to dityrosine transporter
XLOC_012959	0.348492	1.61979	1.78219	2.2713	0.497959	0.719529	0.338829	0.726876	0.0962913	0.455629	0.184957	1.18811	0.325193	0.673849	0.191103	0.382407	FFC1_12280	FFUJ_11876	uncharacterized protein FFUJ_11876	MTSAVAVAATLSTEIRLAQAVSEFVEDLSDEQKHSYRLQRDHRSTPNIDDVMRLTAEIDKRVAREDPGSGRVFGPRLTNFILAIQQYAARGDVVIGGSANLIAFSVWLILQMTLRILGEDSRLLEKASTLFMNAGRSAPCCEEIDLPLFESKKLKLCLNEYLIVVIRICHYLVRLMQTSVPGETVSDLTDSKLSEFESELNLWAASYHQQVKSAGSQAFSGQSGDFIDTLSDSDESDMNPTRSRQELAEIYLRYNHEVVWENIRRLGSTNLFKFHPEYQSFIDCSHSSTLLYSGKAGAGKSLILANIVDDLIQRQRGNSQVAYFFCLWDKFNSLQAVTILASLYLQLKHKVPDDILLLKNLRNHSFDTETVIARLQSALKPDQKTYFVLDGLDMCEEGE…	uncharacterized protein FFFS_11390
XLOC_013442	0.260357	11.0331	17.0151	15.5651	0	0.258711	0.0710926	0.132914	0.162707	4.40752	5.38255	7.55624	0	0.267769	0.10755	0.125438	FFC1_12279	FFUJ_11877	uncharacterized protein FFUJ_11877	MAVEEPPNRGFTLYLRPVLSALSRQILTTLENHPWTYETTSEGKITVVYAEPAQDLCALSRVSHRLRDVAQPVLYHEFPNFEHRERRLEPFLDTVTFRTDLARAVKVMAWNSNLANDLDIVRAQTGYHQGLKALGIDENQLWPDDECDMFLSPSALKVYGVNSIKLRELLATDLPHVILDVAPDLNHLVIGHFNPRNIYSPGSSKKPRTIGYLMSEQDFKLEEASPYRLDTRDLEKILTSRGQPLRRFRFETSRIKTKVDVPRISFSYLDNFCTTLESLHLEYDVDARLFGSTIRSLKKFTSLKEIFITANLIYSIREDDDPTRDAKSLVNFLPDQIEIFTEIDWTAPPFEHQPLARGFDGLLDAMIQGSFPKLRRVRLERYIVK	uncharacterized protein FFC1_12279
XLOC_013433	0.510205	3.3398	3.00474	0.484122	0.0431087	0.0827311	0	0.0364599	0.398115	0.768439	2.26334	0.265364	0.0746668	0.154651	0	0.0631507	FFC1_12258	FFUJ_11898	related to dlpA protein	MATPDLSLAEKLRSYSTCDVSDALLKVGVPHGGFLPNLSMRSPLRQEGDRKLIGPAYTVKFVRNTQTNAPKLKEHYIDTIPKDHVVFISAPHGIFNAVYGGLMSTRAKYSGAVGTVVDGTFRDLQDHRKLGYPVFARNVGTPSFYEIARPSEINVPVMLQDPALDVTINPGDIIFGDLNGVVCVPQNALSKIVEILPAQVEADDNMARDIAQGKTFTAAKKEYR	related to dlpA protein
XLOC_013431	64.6997	182.162	208.435	64.1439	3.51219	7.80588	5.8457	3.07031	20.7872	34.6475	75.7395	14.579	1.59142	2.85733	1.31445	1.25124	FFC1_12256	FFUJ_11900	uncharacterized protein FFUJ_11900	MSQSLAAFRSGRSDELRKLAEEHFQHDLNENDRDILKTAGSKVSTHATVGSLLGLGFGVLCAFRLRKMRLAYFNAFRAVEKPVEVKFADGRTQPIPDLTAQLAPSKWGDAATYFFFSIGGLFLGGETGLLSGTASASRTITKNPEAKERIEKAWKNYRIDVMKQEIKQLEGKSKLEQLFS	uncharacterized protein FFB14_10692
XLOC_012942	1.03365	7.68604	1.33135	0.265889	2.27384	1.37345	0.643394	1.07895	1.26907	6.9903	0.718913	0.395399	0.104169	0.737777	0.637987	0.876548	FFC1_12249	FFUJ_11906	probable 2-dehydropantoate 2-reductase family protein	MTSPKDRVLLIGSGGIGTIAALNLERGGLAEVTSVLRSNFEVVRSKGFTIRSCQHGDIHNWRPTESLDAIPSRYDAQGRPFDYIVCCTKNIPDIIPTLCDIVAPAVTPGHTAIVLIQNGLNIERPFIHQFPNNVIVSGISRIDAHEVAHGVIEHKQNDVLHIGAFNNPTLHSKVQEAAAKRFVEIYSKGGKTTCLYQPDVDLDRWSKLVYNASFNPICALSRLNTGELQRTGRVVDTLVIPAMKEVLAVAKRAGYELPENIINDTVNSNPIDESITPSMQIDLEKGNFIEHENIIGEVVREGRERGVATPVLSILYELCCAVQWKLKEKRNSK	probable 2-dehydropantoate 2-reductase family protein
XLOC_013428	0.947253	6.04981	2.73571	0.712095	2.45223	1.197	0.79429	0.828025	0.779456	5.81702	2.37484	0.777225	1.43884	0.257003	0.214917	0.326566	FFC1_12248	FFUJ_11907	related to D-amino acid oxidase	MEVGIIGSGIIGLTSALALVDAGYSVTIVARDLPGDDSSQQWASPWAGAGILPHPDYKGHDLQTETFKFYWALAHRDPTSGVQAVDVTEYYDDRDDDSTIWYKKMAPKYRRLPSKDLPATAKIGFKYRSMTVNPAVFLPWIKTVLDRKGVRFIRAEVKSIEEARSILGTKIIVNASGLGAFHLVNDQKVVAVRGQTMLVESDSHEMVMFQGSHYTYQIPRMYSGGVIVGGVSQAGNMDQNVDPAVRSDILRRMKLVAKDLYQDVDLSKHVMKDLVGFRPSREGGYRLEREGELIHAYGFNTLGYTYSYGVALKIRDLITSATEEEAVRSKL	related to D-amino acid oxidase
XLOC_012921	15.7746	24.5125	47.0662	9.97897	9.48614	20.2442	62.9291	46.9251	13.3761	19.1527	25.4717	2.18963	8.48802	22.4315	51.969	34.9423	FFC1_12210	FFUJ_11945	probable hexokinase	MASLQTYLQELEREFTVDTAKLKHITKHFIDELDKANQQQPMNPTWVMQQPTGNETGKYLVLDLGGTNLRVFSVELPEEKSGFKVNQVTHKLPKELRTGPAERLWDFVAGHLEEFLKTADFEAGTNTDLSFIFSFPTTQRTIDEGILQRWTKGFDVADCEGRDVAALLRQAIAKRVCIMRSWYDPNTDVRQKLPLKVRVVTNDTTATMMASAYINSETAIGCVFGTGCNGAYLERCQSIPKLDMEGLPAEALMAINCEWGAFDNEHVVLPLTSFDIAIDDASPRKGQQAFEKMVAGLYLGELFRLIMLDVKKKDETFWEGQSLEKMQEPYFMDSSFLSAIEEYVNNLPFINFLTNHGSRDTSTDFKTSHDLSVAKLGVSPNLKELEFMRSVATLITTRA…	Hexokinase
XLOC_013395	4.63408	15.1198	15.3904	3.03317	0.370376	0.72571	0.467345	0.523733	3.07571	2.09381	11.5869	0.750494	0.13762	0.455032	0.304994	0.259098	FFC1_12176	FFUJ_11978	related to 6-phosphogluconate dehydrogenase	MLERQIAKIGMVGMGSVGSMMSLLFAEKGCKVYYFDISEYNMRAAEKMVKDVNKETRVFRQHSYQQLCEEIYSENHPRIIIFSIPHGNPGDECVKALRPYMSKGDIILDCSNEFYGNTERRQADLAKDGIFYVGCGVSGGYQSARAGPSMSPGGDPQALEIIMPLLRRVASKDRDGKPCTSPIGPGGSGHYVKMIHNGIEQGMMSVISEVWYILTKGLQLSYEEAAGVFEKWNETPELYNTFLIYIAVDINRTKDKEGRYVLGRIQDKVVQDVDNTEGTGTWSCEEAVRLHVPAANIVSAHMFRCASAELSQRAANAEASGRWQPSAMKVPSRSAFIEDLRKTTYFCLLLCFTQGLQIIREMDQQREWHINYQDLLHVWSAGSIIQAGGIMDLLHKVYS…	related to 6-phosphogluconate dehydrogenase
XLOC_012725	0.365217	5.51911	3.70088	2.60378	0	0	0	0	0.310321	3.83074	2.85171	2.58606	0	0	0.0602622	0	FFC1_11847	FFUJ_12414	uncharacterized protein FFUJ_12414	MYEPASSAPFARAALNPPVRFVPPCTAPAIIKQEPDDSEPILIGSNSPSPEPRSSVESRDRLFTSLELGEYIFRNPRSITTPDDLDYSELKRCFDILHACSVATEFNATLSKTKDTMEDFLTAIFKNWTGDAGEPDKPAMDFAVREYISVGNICSQPANHRTSSSCAESSSCRTPVFGIATYRSRPAQLSISFSTTEPEQSSSQYAQDFFCPMERTDVRWEEGDWMTDLRRSMKRTCINKVHRYNKHLAIWYVRCLVSGWANGSIDMGKDVEVFSFVAKEAVDTAFAMMGDI	uncharacterized protein FFUJ_12414
XLOC_016369	0.191289	1.29241	1.31523	1.65476	0.314242	0.383278	0.248139	0.958843	0.0897519	0.256701	0.276528	0.592811	0.209416	0.214517	0.113255	0.215448	FFC1_15260	FFUJ_12651	uncharacterized protein FFUJ_12651	MAEAIGLAASIAGLVQLTGSVFKQLIRFCKEAKDAPSKAQDLATQTRDLAGIFENLRLLASALEERDSGPALKPQHLESCQNTLNQIDSKLDKALSDFEGGKSARRFVRRLKWPFSLQETKDFVAELANHRANLHLALSADSMDALIKSLAKQDEIHSMIERRISFETRVELNKRRKEVMNFFLRVQPQDYLDVSRELRHEATGSWLTSDNSTFERWKNGSNSKLWLSGIPGSGKTVLCGLVIETILEQSDDLTAVCFAFCDYKNPDSCLPENILAALVVQLGLQGEEAFDLLEEYFDMLHPDDKLPTKPRLDDLVELVGCMSEVYEKVFVIVDGLDECGDQVTHMTRSLKAIVDGSEIVSSAFFSRKEEEIREQLAEGFEHIEVSAHVKDLEDYTLAE…	uncharacterized protein FFB20_05554
XLOC_006336	7.57602	33.7893	12.95	14.9199	19.1041	21.5974	18.9096	15.9869	0.458665	5.42245	1.45058	2.83672	2.85636	5.78505	3.48643	3.63923	FFC1_06653	FFUJ_12988	uncharacterized protein FFUJ_12988	MTTSQDYDQTDEPLLVFETPLEHQVIGEDDTVRTENASMSDWERRNIIERTSGSIHTRVELLSVIHGSYNEGGDKATLMVFRFRFDPQKSSRRVIRAKVEIEFSTTDDSYLEVDAIAPEERWTVVPTTDTETTTRSGQLNLGASGVPFLEAGASASLEKSYTRDVSGATTITGSINLGSGKNSGDSTVAAWNLQENERRKTGVPDSVTTAILVRRAGDERFNAEVTLQADVDWVTGWERRLSKIPLDDPILFNPRETGGSGKKGRSYGAKDLASVDLNELCKVRMAVEAPFAVK	uncharacterized protein LW93_8207
XLOC_007080	16.0178	44.2722	87.5675	13.5152	6.23455	8.43687	8.62613	5.40361	6.11967	14.0483	46.1597	3.38341	1.92344	0.861532	1.03419	0.742872	FFC1_06476	FFUJ_13152	uncharacterized protein FFUJ_13152	MLPARPLIRSTVPRAARASRASRQVRFQSTASSSSSSAHLASGIAGGFVGSAIFYGIYSYTPAGRAASGINKAAKEAQQKYEAAAKKLQKNTPDADQAVNYIKEFAYSYVGWIPGGRAYVDAAFKDWEKVRENNKDEADKLVNDAYKQFQDLSKSGLSLETASKAYDVLADLAKKVANLAGDAIGDIIDNHPQVKEKLGSNVDQLKELGDKYGPEAKKQVDETWKQVKDIFAGGFSAASISKARKLIEEKVEQIKKLGDQAWKKGLEEAKPYLDKNPKVKELIEKNADALKEGNTAELFKRAKSAVDSGDLGDLEKYVKDATEKVKSKGNELTGGWVDIEKYIKEIPNGGEVMEKLQQLSEVADKHKEEGEKLFKETVEELRQVLEKKSEKAQEIAGEA…	uncharacterized protein FFUJ_13152
XLOC_006175	82.5339	159.65	344.386	106.738	3.63899	9.91217	12.491	9.12322	28.2696	74.1795	247.341	41.1465	0.190467	5.29743	6.01958	6.84334	FFC1_06346	FFUJ_13276	uncharacterized protein FFUJ_13276	MSFLTENVIRRVALAPRVIAFQAPRTFTTSFALQRTATDAVKDTAKKVDRVVSDKIVDGIEAGENAASKAKDVAQDVTGGSATGKAQELRGEAAGKAQELKGEAKGAAEQAKGKVKGAAEEVKGKL	related to LEA domain protein
XLOC_006104	191.106	555.124	719.433	159.343	1092.92	1145.27	1187.71	679.254	6.84284	73.4853	191.135	41.8959	131.021	62.963	112.055	78.8348	FFC1_06211	FFUJ_13406	uncharacterized protein FFUJ_13406	MKSSFLTIFGLAAAAVAQSSDDLPQCGRTCAGNMVSAEKSQELGCDAGDIGCLCTNQDFIYGLRDCSAAICNSEQAAQVLNYGLEICRRAGVQITTGASGEVSATATGSGAVRTVLSTLTSGDSTITSALSTISGTATGASDDVSVSTYTSVLTNSEGDEFTTTGKAILGGAVVTTFTSGGSTIVSTIASGAESETSGAESAKVTTFTSDGTEIVRTLVTETASTDSAASAEVTTFTTDGTEVVRTLTTVTSGSESESVSETVTDASTATEGATDATGTDASATATSTDNAAAAQMTGAPVGVIAAAGIAMLLL	uncharacterized protein FFUJ_13406
XLOC_006087	0.911376	3.32597	3.81946	4.09843	0.691747	1.1035	1.25798	0.824557	0.214875	1.55833	1.51512	1.88179	0.0613954	0.211853	0.290897	0.0545235	FFC1_06179	FFUJ_13436	related to quinate transport protein	MGLAGILKKVIRNDAMKTDPEEIYNWRVFAIVAGSCFGGMLFGWDTGAIGGVLAMKATQERFNYTPEAKVTLDQNIVSTLQAGCFAACFFTSYFTEKFGRRWCLVGTGIVTTIGVILQAASTANGSLPLMYVGRFVGGLGVGAASSLVPLYVSECAPRAIRGGLTSFYQLFIVTGVMLSFWVNYGALLHLKAPTVYALPLALQALPAVLLITCMLLAPESPRWCARKDDWERAKSILISLRMLPEDHEYVQAELQEMSAQLEAEKRLTGDASASTLWKELVTIPGNRKRAIISVLLMICQQMTGVNAVNYYAPQIFQSLGMTGTTVSLFATGVYGIVKVLGCAAFLIFCADSLGRRRSLLWTSAAQALTMYIIGIYGRVEPPVAGQGISAFGYVAIVCI…	related to quinate transport protein
XLOC_004002	0.283217	1.7143	1.58002	0.695942	9.35144	6.56058	6.37484	2.29723	0.120899	0.703389	0.698397	0.261763	6.44416	4.89336	7.66223	0.988894	FFC1_03757	FFUJ_14280	related to neutral amino acid permease	MLGTEKVDDQEGQVFAGEVHDDPGHAHDAVFGRLTNDGPNYRNVGWVGTAGLMMKTQLGLGILSIPSVFDTLGMIPGLICLCAIAAITTWSDYIVGTFKLRHREVYGIDDAGGLMFGRAGQEIFGFAFGLYWTFVCGSAMLSVSIGFNAVSDHGTCTAVFVAVAAITGFIFASIRTLGKLSWLAWLGLICVISSVIILTIAVGIQDRPAAAPKDAVWVSDYELFKKPSFTNAMSAICALIFAYAGTPAFFSIAAEMRDPRHYTRSLILCQTVISACYIAIGCVVYYFCGSYVASPALGSAGVLIKRVSYGIALPGLIVTTMLTCHLASKHVFVRVLRGSKHLAANTFTHWVSWIGCTFGITVVAYVIASGIPIFGGLVSLIGALLATSLSFQPMGCMWL…	related to neutral amino acid permease
XLOC_005905	31.6949	106.844	158.815	40.2632	5.05528	7.64498	6.45051	5.38747	1.15772	20.083	6.12957	23.501	1.47287	1.51506	1.01619	1.45307	FFC1_05848	FFUJ_14529	uncharacterized protein FFUJ_14529	MEWTKATYNEQYEKWVPWMEDMYLRWFTKDNKTSYAAKQNLDKTKVTGVEQVDTLQDGVHNLAAGQVGQGGLLQPVGDLASKEGVNRAERQGRDENGGYVNKDIPGSGAMNSTANAVVGGGQGAAQGLQDVGKGVGNTVGGLLGGKKE	uncharacterized protein FFUJ_14529
XLOC_012183	15.2012	134.219	110.986	99.255	20.7737	24.1684	21.9049	20.0176	4.4487	15.394	31.0418	49.7918	3.05055	6.96416	2.46638	9.11427	FFC1_11698	FFUJ_14913	uncharacterized protein FFUJ_14913	MEHTFLTIHNLHPDANILYASDSIFEILGYSPQDVINKSAFEFFHPDEIPYARSVHSRGVLLDKAAVLHYARLRSHDGRWVSSECCFSIVHDILFACISIYRRDAKSERRALDAPQVRRLFSRSPRDPRYHMLQHLSPKFRLPPVEREPRAALILNRFTRTLTIMFATDAVASILGVPADQVQHKSFYECIRETCLDDALKCIESAKANDSIAYLRFWSRDPRRPEDFEEEGSDVDEESTIDGVGGRNESEGPRHFRTGTTNNPSLDQNGSGSGSMAPNQQRRAESRRSSDSEGGGVKLDGAMDLDSNSNSHRGSAGPSIKVEPDVDMQDGITSNETSGESRTTSSNALGSSSRATRYQTPLTPQSPPPLEDNVSQARRSRTRPARHLAPSVELEAVVS…	uncharacterized protein FFUJ_14913
XLOC_005984	2.07733	6.93375	7.45433	4.0274	1.44119	5.70177	5.99656	3.87605	1.33613	0.988229	3.73366	3.73272	1.42524	2.80777	4.71648	3.03149	null	#N/A	#N/A	#N/A	#N/A
XLOC_010686	10.8361	76.0625	57.9535	34.4854	1.6934	0.953741	4.8308	2.35546	5.50155	26.373	13.9761	9.72407	2.5881	1.08183	2.3966	0.552313	null	#N/A	#N/A	#N/A	#N/A
XLOC_000506	4.40434	21.4149	21.2251	20.0636	13.5616	12.8861	13.0027	13.084	3.98911	7.52492	9.20901	6.40266	4.18135	1.18925	5.93817	3.69209	null	#N/A	#N/A	#N/A	#N/A
XLOC_003813	0.397821	3.71429	4.14727	5.18919	0	0	0	0.262745	0.347513	0.416246	3.26198	1.97834	0	0	0	0.45509	null	#N/A	#N/A	#N/A	#N/A
XLOC_010553	0.172091	2.73808	3.79734	0.646688	0	0.200175	0.988955	0.714448	0.289549	2.95183	1.84475	1.1201	0	0.35692	1.71293	1.23747	null	#N/A	#N/A	#N/A	#N/A
XLOC_009932	0.437509	1.56837	4.10674	0.7194	1.27781	1.71354	0.670997	0.829372	0.234161	1.20543	0.994381	0.550386	0.718052	0.728665	0.650591	0.563178	FFC1_09468	#N/A	#N/A	#N/A	host-specific AK-toxin Akt2
FFC1_15863	1.99667	6.24739	12.9075	1.98734	0.30231	0.535429	0.337497	0.824033	0.653994	2.71578	6.00777	0.523193	0.159242	0.146839	0.088328	0.585248	FFC1_15863	#N/A	#N/A	#N/A	related to delta3-cis-delta2-trans-enoyl-CoA isomerase
XLOC_010148	6.99075	24.3053	8.72805	2.26686	1.37473	3.04636	8.26414	9.81868	4.22805	12.0086	4.75876	2.14919	2.38111	1.49338	5.91004	11.3128	null	#N/A	#N/A	#N/A	#N/A
XLOC_006510	0.280711	4.09375	2.67235	0.149228	0	0	0.063734	0.0145076	0.262601	2.16413	0.903622	0.10365	0	0	0.107235	0.0488195	FFC1_05394	#N/A	#N/A	#N/A	probable GPI anchored protein

## Sheet: Intermediate induction
Probe	WT_0	WT_15	WT_60	WT_240	WC_0	WC_15	WC_60	WC_240	WT_0_desv	WT_15_desv	WT_60_desv	WT_240_desv	WC_0_desv	WC_15_desv	WC_60_desv	WC_240_desv	Feature	IMI	Protein name	Seq	Description
XLOC_000031	1.93474	7.62988	21.2223	14.5434	2.09797	4.35749	4.06473	5.20738	0.919247	1.33099	7.02239	2.4783	0.244382	1.64999	1.60036	2.50672	FFC1_00066	FFUJ_00034	related to vegetatible incompatibility protein HET-E-1	MVGFAARRLENIKQNEMLLSELKSPIPKVDPQSKPASKRVKRRTTPPSAPTRQSRRIAEASTKPNYNEELGDASGPQTSFKTRKQSRANYNNAVESTSSDPESDPQTRKDVKSIQDGWTRWKAEADQPTRNASGAFQFESHPDFRPNKSPEEIIREGSFGGSYWRPLFSKHLGITIQDDWRELPLSWTAGLNVDEYLTSDTYNPEINKYGVACGQSIEEWEAAGWIAHEYDVRGWFQWYCRFWMGRRCSDDERQISRWKKCVGETGRWRRILLKKYVALGIRTVFADDGRDEDEVDVSPVVHQTCHHWAYEVRQDALERFWADGR	related to vegetatible incompatibility protein HET-E-1
XLOC_001304	23.9088	24.8611	88.4518	60.3627	2.35367	4.33381	7.19574	4.66648	11.7867	8.25544	24.8954	8.31562	1.15083	1.27183	1.51503	1.85638	FFC1_00184	FFUJ_00148	related to nucleoside-diphosphate-sugar epimerase	MSPTGTTGFIGGDAFYALHKAHPDWKYTILVRSEDKGKDVQKQYPDVKLAIGSLDDSKVIEKAASEADIVVHTADSSDHQGAAKAIAAGLRSTHSSSNPGYWIHISGTGILCWYDMDNKRYGEGPLPEQAYNDLEGVDKVTSLPDTAFHRDVDKIVLDEAAKDPSAVKVAIVCPPTIYGTGRGPSNQRSRQIPGLTETTLEKGFGPIIGAGETEWDNVHVHDLSNLIVLLSERAASNEKHSDEQEIWGPKGYFFAENGKHKWSQISALIAKEAKKQGVIESDETKVLDVDEAQKKLGFQALSWGLNSRGEAKRARKYLGWKPEGESLEEWIPESVQIEAKRLNKA	related to nucleoside-diphosphate-sugar epimerase
XLOC_001331	75.07	55.2136	243.974	61.2153	10.3418	11.1074	12.4009	22.6926	52.476	40.1136	118.427	31.2837	2.78274	2.92361	5.15871	6.25002	FFC1_00245	FFUJ_00204	related to endo-polygalacturonase 6	MTQNKTLVYKKIPTGLPVAGEHLVTEDRPVDIDSAPQGGVIVELQYASFDPYLRGKMRDTSTKSYAPAFEINDPIVNGTLGKIIKSDTSDFSEGDLVTAYLPIAEYVRVEKDTLPKVNMRKVQNPHNLDLGLFLGPLGMPGLTAWSGLHQIGKPKKGETIFISSAAGAVGQIVGQIAKREGLTVIGSVGDDAKLDFITKELGFDAGFNYKKESPKDALPRLAPNGIDIYFENVGGDHLEAALNNINVGGRIPVCGLISEYNTPADQRQGVKGLLNLIAKQVKMEGFLVGNPAFGPAYYKEHQENLQKWLADGSVKAKLYVTEGIDNAAEGFIGMLQGKNFGKAVLKLK	related to endo-polygalacturonase 6
XLOC_000174	39.9415	71.9871	318.207	337.08	0.41496	1.47779	4.16101	1.93516	31.8222	59.2122	247.535	302.299	0.708498	1.01144	5.77673	2.72252	FFC1_00338	FFUJ_00295	CON-10 conidation-specific protein CON-10	MTGTDNPNPGNFANRPKEEVQEIASKGGKSSHSGGFASMDADKQREIASEGGKASSGSFEAGSEKAKEAGRKGGLAS	conidiation-specific protein 10
XLOC_000200	1.44062	1.81748	9.85259	1.71039	2.74658	3.10095	3.08267	2.78617	0.320792	0.508417	4.28147	0.430305	0.354233	1.17581	1.46726	0.63979	FFC1_00380	FFUJ_00337	probable catechol O-methyltransferase	MPSFDEKKAYVEQEETFFDDGREIELLHYIYGRSDIDELRGSPERVLQAIDEFGRTKKYLMNVGEDKGKIVTDLIAEVKPKVMVELGGYVGYSTLLFANAVRKSGGTHYFSLERNPEFAAVITSLLDLSGLRDIARVIVGPSDASLARLHANGTISKIDLMFLDHYKPAYTSDLKLCERLGLVGPGSVLAADNVIKPGNPPYLAYVRSSVAEKRAAKGGNEKEEFADRTAKQYLKREGEEKINEEEGDPNLVYESKLVHSFEPTGVPDAVEITRCTGRED	probable catechol O-methyltransferase
XLOC_000288	6.84938	7.92052	19.9126	24.8798	13.6093	14.1531	13.3003	11.789	0.977254	2.49035	8.86252	11.734	2.10466	1.71392	0.186245	4.61984	FFC1_00538	FFUJ_00492	related to nitrogen permease regulator	MIQGIFYARFFPQEGPKIVAQSPAGCITAVEGSTKSPLIDFDVLHEYIIPRQAFCNRYLTINTPDGKYTVLGYPVVIPHTKYLRNEFIFNFGLVLDADVDHVPYERVVRGLASTFSEMEKQNEYLSQNAETKGSGRRPIDSLLEIVKEDLDNYGECMIPVDEANTINMKLFPHHMDPPRVRGWHVPVPKAKFSDIMDPTWDLTLQKVISHIDGVSDVRRIAHAASVSLELAKTALRHLLYYDTILLLDMFFFTACYAPRPGIHDFIRNVDGMVDECAAYVSHGRGLVSNYHLIKLMSTFAPGKSVMEWLKGHQVTGFEVLRFVDVRRFVQFGVIKGCIYRVHKFVVSKQYLAALASGQSRPVPGGDPLQKYTDGCHHFDQIITEQNMTDSEIMEKLKKL…	related to nitrogen permease regulator
XLOC_001597	42.3664	58.9382	161.981	57.0942	38.251	44.9541	52.2907	48.437	19.3261	12.5328	43.3251	10.5851	8.22934	5.57314	15.4147	7.1433	FFC1_00790	FFUJ_00727	uncharacterized protein FFUJ_00727	MLQSPSSSAPATVAVAEGVDKTRRLRRKRKAETQDNERLSKRLSLLNLERSGNKLYVPVEQPTTTPISSAAPVPTSSNAVSNPVPDETMQLDDSKHKVYIYNIDDELSSDSESDDPGKLVFLPDIEKHLRANRIPPSVLANSEGELAGMQVVLYSDPKSLTVPEDKDSVRKAIIESRNRTRELQRLEREGKTEPPTIQDAILNTGIATSTDDDPDAMDLD	uncharacterized protein FFUJ_00727
XLOC_000454	0.712372	0.786741	3.07156	2.05818	3.31781	2.41502	1.39409	2.75045	0.328368	0.117392	1.46296	0.919192	0.548221	0.822917	0.503287	0.997667	FFC1_00820	FFUJ_00756	related to UDP-glucuronosyltransferase 2C1 microsomal	MADSHEFRRRILLLATTGGFTHAAPVLEIGAVLASRGHEVQFATCAGQEDWTANYPFIKTVYTVGPAASEDDLDVHYETMRLWRHEHGFGPMMRSKYFFDNFWTDTYKSLRSLCENDSTRPDFIVADFFADSAARDMFKQFNIQLASVWPQMPYAMAPVSYHPGQPGFQADGALTSEHAPLSSRFWNEFVVLAALPAIIPWLIWTKRMRVDAGVNYSHSLLSKPDYLVLVNSFWGLEAPKELPPLMAPVGPILSDEYLPIDDDLAQFLSNHDRTIYVCLGTHVNLPGKELEKYLLGFIQALDEDSINGVIWSIPQKPRANFDTIKSYSLSDGSSISITDLLNDSHPHFRLPIFAPQRAILAHPHTVLFLTHGGGSSANETLFHGTPVLAIGYFFDQLCN…	related to UDP-glucuronosyltransferase 2C1 microsomal
XLOC_001621	141.278	177.628	378.493	530.137	43.3584	40.5588	37.4664	46.2839	53.7255	41.8336	51.3245	140.708	7.05121	3.68289	1.68302	12.0965	FFC1_00841	FFUJ_00777	uncharacterized protein FFUJ_00777	MGWLWSSTPPSEGKSAAPVKEAPSVTSISTTATTTSDPSTSAPSNSNTDPEIQKFIDLFEAEKNAKPSATEDQQQQNSSSSKLPSWLSLKKSTRSSTPTPADIPPRDALSEALLPTDMSCRQAFDQAWACNSMGGQFNAVYRYGEMRSCSEHWDDFWFCMRTKSYSPEMREKAIRDYYRAKEFTKYGPGKPSSEDVWESREGKVPEGTVFNEPVEPRN	Early meiotic induction protein 1
XLOC_000507	3.83371	7.13304	12.6397	10.6671	7.10976	6.0958	7.29764	10.193	2.05883	1.66757	0.869505	4.12073	1.31545	0.808395	1.62068	4.09774	FFC1_00913	FFUJ_00845	uncharacterized protein FFUJ_00845	MGEGAQRREVSYRSACTECARRKQRCNREWPCSGCQKRKVADKCRFKDTNQPTADRVTLDRQRKTRGNNKIGADSGDEPDIEGTRSNGIDTLGYMPSNLIFDLASEHETTRGASQEFVKDPRSFPQLERALRVIPARPFTDTLVQNFLSNVNYHYYIVYPPSFIEQYQLWWTSRTENRPLSVQWTCLLLTICACASQYTDVELQQNLEVGLGDPIQRISERFHEAARELGSAIPLGHGHIINVQQLLHSCYWFKAEARFVECWHVLNSAIREAQELSIHQEGKAGPISEFDLEVRRRIWCILDTWDWQISTLLGRPMIIDRADCDASLPSLGLEGCQYPPLLHMKMQCSVIRQLSRRFGSPKNVTTHADVQEYQGIMETWIATFPPPFNVQHPDRSSDV…	uncharacterized protein FFUJ_00845
XLOC_001698	5.21063	6.15919	16.265	24.143	22.3251	18.0032	18.1898	16.818	2.30345	2.91093	5.98016	11.0495	9.99413	5.60518	2.36325	4.13415	FFC1_00971	FFUJ_00902	uncharacterized protein FFUJ_00902	MHRSTTLFALGALSSTATAAWLKSHQEASWEPPRQTDAYGPEAGEQHQIAMGWSPVPTDAPKLAGAMDMNFALGKRSLGADTCAFNVIGSSFTCINSLSATCSYSDGFVGCCETGRTCNSVKTACIPYTLSVESCQSLTDAHTVCCDRKAPSCLTLAGKTNGDDYTLFVCDTTSGSSPLLFSDPLAFSSTTTSDDSSVTENPSTTTDDGSSTTTSAAATSTSADNGGGGSSTNVGAIAGGVVGGVAALALVGLAGFLLFRRRNKTTPAAAAAATPGDGPSFVPSSPSNAAYPSGVPSNYQGGYQQAYDPSLAAPYGQPQGYQQPGYSGYSPQPQNFQGQYPQQTQYPSQYGVGGYGAPSASPPPHFTPSPGPNKDGPEGAPQQHVQELPAVQPLGNEGN…	uncharacterized protein FFE2_00976
XLOC_000536	12.5571	15.9728	39.9112	45.5018	0.723342	0.686013	0.743833	0.879622	1.5143	5.17553	22.3863	10.7208	0.176516	0.363146	0.388067	0.615465	FFC1_00973	FFUJ_00904	uncharacterized protein FFUJ_00904	MFSEAKPLPPVKRFITTHDSNGNAIWDETIPIQVEGNRSGGFTTHVSYVNEDGTNTLTGDNDLKSYRENPTEKDIAPASGSALRVVDFWPGFPAIMHRTASVDYGIIVDGQIDCILDNGATKTFRRGDIIIQRGTNHAWKNTGTEVCRICFTLLPSPPVKIRGDELEVHGFADFPRLAEQSTV	related to Cupin domain protein
XLOC_001780	0.675246	1.02528	2.21496	2.67249	1.34711	1.30095	0.954265	1.5816	0.175408	0.091394	0.237396	0.295849	0.391004	0.0560924	0.202276	0.441195	FFC1_01125	FFUJ_01051	uncharacterized protein FFUJ_01051	MSPETPSRARAQSLGRTTEQSHHDESSSDSDTRSNSSSYVDYSSEFDDDDDEPSAIRSPTKLTYLIDHLPEETQSIVRDTFKEPPKIALEKCRRIDDTYAFQMTELVTRSVRIRPPQDGTSNLSCSCRDDGQPCQHLLWLLDQIVKQTLYETDLSKPLRMSPAGHAEEMGEAFQNISNFRLDVLAEGLHCHLVTPDSEYNNEPDAFRAQEAREMLSSVYSMDPGDFRPDIFEKGSHSRKIIKRNDLEETISRMLLDNHHFFHYFRSLSRPQDPIKDVFYKLTQRIDRVVRDLDTPGQTSDPDPTRDVTWAASHILGCVRRMRHDIYTRESPISAREALSAARSFVHILDLVVSRNTDHGPIDAPRIDRNLYLRLIGDRDQDFILNVLNLIPEAASQFLH…	uncharacterized protein Y057_14727
XLOC_001804	14.3088	53.3371	334.766	60.7779	4.14089	5.67563	8.08435	3.56954	10.5176	39.7889	264.594	55.3662	1.35697	2.48916	6.95096	1.35739	FFC1_01162	FFUJ_01088	related to short-chain alcohol dehydrogenase	MTTQNFKNEKDIPVSHQDFPGTEREMPDPKATRDEVPEAGGNSRTYQGSGKLKGKKALITGGDSGIGAASALLFGREGVSDIVIAYLPEEEKDAQDTKKQVENEGAKVHLISLDLSKQENCRKLVDFAVEKMNGIDILFNNAAYQMMVQDIKDLPEEQWIHTFNINIHSFFYISKYALPHMKAGATIINNASINAYIGRPDLLDYTSTKGAIVSFTRGLSNQYVSKGIRVNAVAPGPVWTPLIPATMDDEAQKQFTSPMGRPAQPSEIATCVVFLASSDSSCVSGQTIHCNGGTVVNG	related to short-chain alcohol dehydrogenase
XLOC_000643	10.53	13.0572	47.7945	19.0417	5.19375	5.85417	9.80377	6.31468	6.05323	3.16769	13.896	4.00893	0.650351	0.81499	7.4579	2.65975	FFC1_01167	FFUJ_01091	related to hxB protein	MVPGLQSQLKYLLTDLDGSLSLNLCLSPETVSYSVNTRGSLSPFPNTAASQSSASMAPSVMADTNTALKHRSERDIRSPDMEYNSSVEDFREYEYPNMAQGAYLDHGGATIYARSLITGFSQAMIGNLWGNPHSENLPAKLSGDMVDNIRAKALDFVGADPKYFDLVFVANATAAIKLVADAFRDIGEKTPTKGFWYGCHKEAHTSIIGVRALTSGDYHCFEDDESVEEWISRPFSCQSRRGKSTSLGLFAYPGQSNLSGRRLPQDWSKRIRQHPQLRNVYTLFDAAALAMTSSLSSLFHDPMDAPDFTCLSFYKIFGFPDLGALVVRRASGHILNLRRYFGGGTISQLSPSKDSRVMKKVPGLGDLHKIWDIHEGVEDGTLPFHSILALGVAIDTHLR…	related to hxB protein
XLOC_000710	97.5893	253.747	478.972	370.457	121.481	139.657	136.57	136.642	11.4644	33.8151	123.384	41.9364	15.5611	27.299	56.385	35.3592	FFC1_01292	FFUJ_01212	related to benzodiazepine receptor, peripheral-type	MTTYIPALTLPDAVFLKPALSVLLPIGLGTAVGFSATQTQKTYLALKKPSVQPPPWLFGPVWTVLYGLMGYAAYRVADIGLSPFSSPETIVNTRRAMTLYSIQLGLNLIWTPLFFGLYRPIEASVDIVTLLGVNGYLTYLYSSIDSVAAWSQVPYLGWLSFATYLCTTIGHLNNWDLKTKEAKDE	benzodiazapine receptor
XLOC_001890	1.48875	2.03647	5.87299	4.07699	0.265228	0.252413	0.250149	0.427185	0.919233	0.414568	0.701793	0.390024	0.0335897	0.209219	0.0183032	0.0966416	FFC1_01340	FFUJ_01259	uncharacterized protein FFUJ_01259	MAESSRPGEGRGHLSHHQYLTYNQQDPPRSRRREIRYPIGRSTFERADVPTDGARVPNDAQWVARTSSRWSTDDVPVQTFTEWETFAELPIQASALPDGDYTWSPPPIETYGEDEEESPRQRQFSYDRGNYGRRYKSRSRSPIHPRHKIPGREGYLSRDVLSRTAGYNGDWYSRTRGGSLSSNEYEPYDKFDFSSRAQSITDPSKADDSDAESPESEETNIVMGPSSLMKDESASNSRSQITLVHSSAYTGNAEMGGSHAAVLNLVHDPKGQKSPLFRWLHVPQDVMNFEDFWVGISRISGLTKLEKKAVTRLRADVKKSCVKSRTNSKGAKVGYLDPKYVEVPLKPLKTEAMSSSSVSGSARWICIPFFSLEQYSGLLAGTSTSLFPAQTLLQIQYSR…	uncharacterized protein FFC1_01340
XLOC_001891	1.94588	1.60208	6.53469	4.2019	0.18689	0.0813833	0.0212257	0.199254	1.26536	0.498259	1.90848	0.432692	0.168762	0.0329337	0.0367641	0.145112	FFC1_01341	#N/A	#N/A	#N/A	uncharacterized protein FFE2_01347
XLOC_001913	5.52306	8.48036	23.2408	9.8365	4.18945	5.03345	4.83309	4.30106	3.27205	3.68112	9.12175	1.65546	0.624803	0.68761	0.726439	0.554941	FFC1_01383	FFUJ_01296	related to glycosyl hydrolase, family 15	MEGRRSSTLPGGSRRGQTGGYLPIEDYGMIGNMHTCALVGIDGSIDYMCWPDFDSPSVFCRLLDKDKGGHFFISPPPDSIHEDGVVDVVDFFPRPQNIKVTTKGVKLNAYREVTKVQDELKKWLVRRVECIRGSMNLDIELFPSFNYGRDEHETTLFQEQHFTTDNKSKVASFHSKDTQLQLDVAIEKGENETSCPLITFRKEKRPGINGGGLVACIRIEEGQTISFVLRNDIEHHVTENITTDVLDAQQHSTQSFWYNFIAQSNYKGRWREVVFRSLMILKMMTYEPTGAIIAAPTFSIPEAIGGVRNWDYRFSWIRDSSFTIYILLRLGFKAEADAYMEFIMERFVHSRGPDGGLPIMFTIRGETDIPELTLDHLEGYRGSSPVRIGNGAAFHQQFD…	related to glycosyl hydrolase, family 15
XLOC_001975	157.33	212.569	666.571	542.61	10.1388	25.3056	48.5536	470.706	79.2175	71.725	155.288	84.753	6.12167	24.2169	40.0265	755.499	FFC1_01486	FFUJ_01396	related to mitochondrial integral membrane protein	MPLFSSPKDSIEDRPNGTNGSARINDPEEGEQAVPDEHTRLLPNRVNSTQPGLLAPDDPAVSPYNLWSIRALRYLTIAFTLITLVWWILLLVSTFVTPPGIGTRGSPWFAFGFATWTLANLIFTLLFFEVPSKSVRILAIFISGVILLDMVLILSVQKTRYEEGWVGAATVIWALLTSLWTLVVDRTVKWGKAEEEERLTGRAETRRTLFEWSEVMISTVAYAIMSVAVFLITLSIILRALDAGVSHPGKLYPVDNGKYRIHVYCHGNKTDSKGNNLPTVLFEAGERTVEYDFWSFADNAVKNGSISRYCFADRPGYGWSDNAPSPSSAGFVVDTLGEALAGAGESGPWILASAGIGSIYSRVFSARHGDHIKGLLLVDPLHEDLLGDVASPGRGFFLW…	related to mitochondrial integral membrane protein
XLOC_000824	27.0358	37.6403	86.35	41.67	34.5764	43.8478	82.812	38.3276	13.5686	11.0451	49.1991	3.5244	4.99344	10.2357	72.5221	13.3064	FFC1_01506	FFUJ_01415	related to zinc-binding protein	MSQKCVHQGCGKEFTDPDEKCEYHPGPPIFHEGQKGWKCCKPRVLTFDEFMDIPPCTTGTHSTTDKPPQLEEKPQQDDAALAQKIDALNAATPSRAPIPTAQHAPTPPPPAPESEDDDPSLEIADGVGCKRRACGATYKKGSSRDDEECVHHPGVPIFHEGSKGYSCCKRRVLEFDQFMKIEGCKTKNRHLFVGSGKKDGANSEEVVSNVRHDFYQTPVNVIASFFLKKIDKSTAKIELQPKQLNLDLTTTDSPPKRYTAQVPLYASIDPEKSSYRVLGTKLEFVLAKSDGTSWPVLRGDEALTGEILQVGRAGRA	related to zinc-binding protein
XLOC_002084	102.423	99.9133	327.021	301.815	1125.71	824	776.12	547.914	47.7507	39.2883	87.771	104.516	401.125	391.377	239.988	346.669	FFC1_01714	FFUJ_01607	probable 1,4-Benzoquinone reductase	MAPKIAIVYYSMYGHIKQLAEAEKAGIEKAGGSADLFQVPETLPEDVLAKMHAPPKPTDVPTLDDPSVLEGYDAFLLGIPTRYGNFPAQWKAFWDKTGKQWASGGFWGKMAGIFVSTASQGGGQETTAQNAISTLTHHGIIYVPFGYAKAFGVLTDLSEVRGGSAWGAGTFAGGDGSRQPSAKELELAQIQGENFYQTVANSQAKAAPEVASNTNKPAEAEKDTTAPKQENKGPQELKEVKEGPCGLPAKCVVQ	minor allergen Alt a 7
XLOC_001060	6.27979	5.33824	32.1094	10.9856	5.63459	7.47912	6.05897	5.69769	2.38292	2.1095	19.1226	4.87518	1.55197	1.04029	0.966638	2.14108	FFC1_01905	FFUJ_01785	uncharacterized protein FFUJ_01785	MKAVFGAGQQGSAAVPIISGVAALGAGVYYLGRSKPGTTPEQDRRGRAEAKKAEGLSGAGIGGNAVTGGHELSHVNSNRKEGITAPLEKLASGGVGGGVGAGGSNVRTSVEMSAKDQPGTSSTSHGSGMLQGLFGTGGSKAGDGSGKETKDTRVASNYDGTPTKRDATKHDQHQPRVDKSGGGDDRNNKGGSSSKNSNDQSASQSLQGAFGQGGGNVAERGDQSQGFRDPRVASNHTETTTKKHAN	uncharacterized protein LW93_11437
XLOC_002265	102.895	118.576	312.611	127.662	26.5075	24.6968	24.4627	18.7661	65.6046	79.1846	69.9142	41.1254	8.09096	5.17055	9.89699	8.23133	FFC1_02042	FFUJ_01915	related to alcohol dehydrogenase, class C	MSTDYEFKGWLGRDPSSVQGKMEWDTFEPKKWEENDVDIKITHCGICGSDLHILRSGWGETPFPCCVGHEIVGKAVRVGSNVTNIKVGDRVGVGAQARSCLRDDCSECSAGRLNYCPKMVSTYGSIYPDDIGKSYGGYADYNRTDSRFVVKIPESLPSEYAAPMLCGGVTVYAPLRNNGCGPGKTVGIVGVGGLGHFGVLFAKALGADKVIGISRKASKKEEVLALGADAYIATDDDEDWANKNAKTIDLMICTVSSSKMPYSDYFKLLRHGADFVQVGAPDSGELPPINAFNLIMGQFKLSGSLIGSPKDIEEMLQLAVEKNVKPWVEKRPMEDANQAVVDMENGKARYRYVLVNQKNID	alcohol dehydrogenase (NADP+)
XLOC_002271	2.65362	2.19723	9.36148	2.55937	21.249	15.7521	10.0791	8.08669	2.50599	1.20147	6.1716	1.17858	12.5051	11.5756	8.28559	5.55204	FFC1_02055	FFUJ_01929	related to UDPglucose 4-epimerase	MAYNVLVTGSSGHLGTALMLSLPTFGFTPLGIDILPSENTTHVGSISDREFVTSLLQKHPIQHVLHAATLHKPHVESHSKQDFIDTNITGTLVLLEEAAKLGAQIESFVFFSTTSTFGAALSPKPGQPAAWIDETVVPIPKNIYGATKVAAEDLCFLVQKQTKMPVLILRTSRFFPEQDDDEDRRAAVSDDNLKVLELAYRRCDIEDIVRAAVCAMKKAREVQFRKYIISAPPPFPNDADTLAMLDKDPKQVFEAVAPECVQVFKDKGWSHLKRIDRVYDSSKAVEELGWKPEFTFKKVVELVGEGKEWKSELTGKVGKRGYHAVSHGVYTVR	related to UDPglucose 4-epimerase
XLOC_002308	5.28034	6.64536	126.462	27.1505	0.677807	0.87277	3.30398	1.09883	2.16373	1.70198	53.8663	9.34431	0.645538	0.147686	4.24077	0.49881	FFC1_02122	FFUJ_01993	probable organic hydroperoxide resistance protein	MSLRISQSLRRAALRPNPSTLLRSPIIAHRFQSTQQNKDLPILYSAHAKVVGARKGHVEAESLNVDLTMSKALGGPGDAGKTNPEEMFAAGYGACFQSAMNAVAAKDGITMPTAPEDSIVETTVHLVGDMKKLDMHLRVDMKIMVRGLEKEKIESIVEKTKKICPYSRAIEGNVWTECTVVKLD	probable organic hydroperoxide resistance protein
XLOC_002475	4.07456	12.77	37.3653	9.96551	0.564702	0.521581	1.072	0.421935	2.45027	4.6506	22.675	5.40521	0.189367	0.154001	0.48994	0.196041	FFC1_02450	FFUJ_06923	probable MNN4-regulates the mannosylphosphorylation	MFRTSSRSLWGVASRASSIRASQFLPRASIAPLLRQQRAVYSSKSDDENPPPPKQPIDIEAERKRGQELLQSNPSVVSSKSSVANAASTAQGSKSADQDMTSELKHDIDVVKDTFTFTDVPRESSVLGLAGTLPYLGTSLSTVFLAWDLNKPIPTGNSFYDAIMIDHETAKYLLSVIEPLQLGYGAVIISFLGAIHWGLEYAEKQPLRERTRFRYGMGLAASIVAWPTLMLPVEYALTSQFMAFVALYFADSRAATKGWAPRWYGSYRFLLTGMVGFAIFISLIGRAKIKQGDAITAKGLSDNFARSGIADHDTNWEKLEAEEKARRRKQKEEEEKKAKEAEKKKKEEEKKGKKKDGKGGDKAKASEEGDKKNEEKSEDNGDNAEKKEDGKDSESKGEG…	probable MNN4-regulates the mannosylphosphorylation
XLOC_003333	44.5989	87.2794	162.208	139.928	6.47924	8.27574	9.91199	9.05522	29.0839	53.7272	134.761	83.972	5.49911	6.16038	3.81746	2.21898	FFC1_02509	FFUJ_06977	related to DUF1264 domain protein	MAEEKKIPVTNEGMGNPLSAKNQVLTAGAAVTQEFRPVKHICAHLNAFHAYADDPSRFVETNHYCAHLSTSLTNRSTRSLTPADEDVRQCLLYDSDEPNARLIGIEYMINPKLYETLDKEERKLWHSHVYEVKSGMLIMPNRAVPESAWQVAENYEMNQVVQLYGKVYHLWQTDRGDTLPLGEPKLMTSFTGDGQFDFEKHVGERDWKFGTDWRVKKEARKDIPSPAVHEGEYEWSTRDCANDL	related to DUF1264 domain protein
XLOC_002508	0.468697	0.760018	1.76464	1.76488	0.0353995	0	0.122351	0.316801	0.345935	0.484987	0.611695	0.680497	0.061314	0.0634974	0.205859	0.270885	FFC1_02515	#N/A	#N/A	#N/A	uncharacterized protein FFM5_05641
XLOC_003338	4.34338	8.12997	15.8299	8.78544	8.0489	10.0473	8.25352	7.5828	1.65922	4.61042	2.74129	3.59744	5.34797	5.39283	3.41418	4.04767	FFC1_02520	FFUJ_06987	related to pyridoxine 4-dehydrogenase	MVKEIQFGDITVPSPGFGAMGISFGLGSNLSLEEAEPVLLKAIELGCTFWDTAVVYQAGVNEKLLGDFIRKHNVRDKVFIASKCGFDVFGKGGVTNSASHIKEYIEGTIERLGFAPDLYYLHRIDPNTPLEESIPALDEIRKQGKTKYIGLSECSAKTLRKANSIAKIDAVQAEYSAFETLHETDGLIDTAKELGIAYVAYSPLGHGWLVDDFPYKSPDDFAPDDFRRTVPKFQGENFYKNKAIVEEIKKLAVRKGCTLTQIALAWVASQGMIAIPGTTKAHRLEENWASRNVDLTEEEKAEMRRIIDSAKPQGNRYSATHQAMVGH	alcohol dehydrogenase
XLOC_002525	0.100858	0.260705	1.4087	2.2939	0	0	0	0	0.154751	0.201586	1.36266	1.87437	0	0	0.140312	0	FFC1_02544	FFUJ_07011	uncharacterized protein FFUJ_07011	MSSNKSSQALRTEVSKLARLSNIQGGLPPLMRGLPVLAIMAGEAILKITNTTNMIEERMLGADEVFILQSPQESTTSPAKNDFGRPGVKLMCQICGQKAGKIQRVGVLDISRAHSSLTEYHQMSGNGNSNSDV	uncharacterized protein FFUJ_07011
XLOC_003351	4.68319	5.91862	15.1983	25.2852	1.53462	1.74674	0.967369	2.5476	1.51887	0.983451	6.35449	6.66127	0.851597	1.00174	0.615839	1.75735	FFC1_02546	FFUJ_07013	related to 6-hydroxy-D-nicotine oxidase	MPAQIKGIELLQCEYVVPDNDAPQLPRWSDTHIEHPALTVTPKTEQDVKDAISIAKENKLTIVAAGGGHGTFVSVDSASLYLDMKLFKKIELNKDEGTVKIGGGVIVGEVLKTLADEGYYTPIPNSDAVGFVGCMLGGGNSAQTGLHGWMVDNMVSFRLVASSGDVVEVNSSSKDKEQALFNVLCGAGHGLGVVTELTVSAFSLSSINMDDDKIWTRSLIFPAPALDVAIKTFLSLSHPPAEGYMSLAFARSPPGTPAAGSPIIILGYQYFGPAEQAEKATALLFQDDIVSKTVVANTELLLFENINAKMNIYNSHHGHKTIASCRLHKTTAEAIKAGFNKWRIATEDYPDAQQSSLIISSYNTDKTSAIKDEKFVEGRDRNINAFMVMVAKEDKTREA…	related to 6-hydroxy-D-nicotine oxidase
XLOC_002534	88.0288	401.256	805.842	226.504	1.21184	2.91846	5.18634	2.42315	60.0817	259.036	608.829	116.419	0.301142	0.857903	4.89363	1.35099	FFC1_02565	FFUJ_07032	uncharacterized protein FFUJ_07032	MSNYEQIAKEAEMDLNTYQAKTGNARPQDVEGAGVNPHAENKFESAQVEFGDELSTNAGYNKRIPPSEGGIVDDKGRQARGQHYEGEGGPLDKLSRANDERGGYNDNDVVGANVKKTSGLGSADDLASKGQEAQRANVGRNPPGPGGSQFKGEDYYQPESVPDSISAEGNIAPESVIEASREAERP	uncharacterized protein FFB20_00222
XLOC_003405	0.183251	0.428596	0.786485	0.590003	0.122498	0.20121	0.164323	0.18553	0.0632324	0.0642067	0.279021	0.205275	0.154047	0.166892	0.113194	0.253827	FFC1_02656	FFUJ_07115	uncharacterized protein FFUJ_07115	MSDSVDSTNPGGAGTGDAPPTKSSLKSLEAARTGVANPEEVSLFGICDGQGDPYTGFTWEQMENNAPQTGVPSLHPLGMIQARPAEAMSSSEPSQSGPSYTAPAHSVSNASNLHLEEDIQSLIDHPKVKHSLSWIPEFSWHDSHLLFDGQPLELPETRDGQLSRGGPSSEHGLSLSQWSVPQIREPDCGHERSQISAILGVGSFVNSDKHWDEKPEVASEILSVSTDISLSVTTFKGEFIEAGLPAQVEIALQKTVNNIVEILVDYYCRSYAPQKQSLAAKRKLADKSSSTSTKSSRASIKRKGAKPGSRKGQAIDGDGESEDEESSGNRQSPSETDTPVEQILFLACPFMKWNPREYRHSCIKKLRDMHGLKKHIQEKHFVNHCPKCFMRPSEDTKVI…	uncharacterized protein FFUJ_07115
XLOC_002599	1.26748	0.973965	4.914	5.63757	2.41035	3.97883	2.4776	3.5091	0.934328	0.217565	1.49975	1.2863	1.1695	2.24343	1.48807	3.91215	FFC1_02678	FFUJ_07137	uncharacterized protein FFUJ_07137	MSEWKPPAFGTPVWMSIPATDVSRAAEFYKTVFNFNFKDSDHKNPGEFRKFDFNPSLGLTGGILQAPDHTGNFHPGKGGLCVYWFVEDVDNIGSVIEKAGGKMLTEKEKEGEFGLYRFFEDTEGSVGAVYQMEQGI	predicted protein [
XLOC_002708	63.2266	119.55	265.225	101.406	75.4663	87.9805	93.8676	83.8245	10.1282	9.3669	32.3512	18.9868	10.8483	4.89703	18.5563	18.2362	FFC1_02905	FFUJ_07352	probable farnesyltranstransferase (al-3)	MIPTADPILSFNPEALPPSALHMLSLSPKAMEKMSGISNPLVSPNAIPPRTSSTGIPTSLNATPTKPVLRPVPEGDWLSQKQLSPRAQMSNAGYGVMQAPNPPPDPERYAHEDLEFTAKRSWTDEKENVVRGPYDYVISHPGKDFRAQLIGAFNVWLDVPTSSLEVITRVVGMLHESSLLIDDVQDSSELRRGFPVAHNIFGVAQTINSANYIYFVALQELHKLNNPELITIFSDELVNLHRGQGMDLFWRDTLTCPTEEDYLEMVGNKTGGLFRLGIKLMAAEANGPSPTDCVPLVNLIGLIFQIRDDYMNLSSKEYSHNKGMCEDLTEGKFSFPVIHSIRTNPTNLQLINILKQKTSDTQIKRYAVAYMESTGSFEYTRKVLSVLIERARKMAEELD…	geranylgeranyl pyrophosphate synthase
XLOC_003571	251.394	941.383	1717.95	524.339	24.806	45.6921	62.3511	43.9654	86.9581	289.746	567.069	195.781	13.3657	15.8805	14.8487	7.76893	FFC1_02940	FFUJ_07384	uncharacterized protein FFUJ_07384	MSSLFAFVCLTPEKLRQFSIIQLSTLNPQLNHITSRHKTSSSQPQLPTQKPPIKMTQSKDQKIAETQANLPLPDQPPKASDWQSADARTVNVGAGKQEGPIGTDSAAQSGLREPATKGEEVDLSNVGREGVEKRQQ	tubulin gamma chain
XLOC_002988	1.4527	5.24492	26.1252	5.98586	1.23975	0.833023	0.733263	1.0437	0.472316	0.629142	13.9975	3.54045	0.81828	0.428371	0.321603	0.804597	FFC1_03389	FFUJ_07815	related to anthranilate synthase component II	MGQHYKPTIDAKVVKVFVLETDTPHPHTQTERGSFGEILHRHFSEAGSKHHPPLGVETEQIFVVTEEGGRMPKVEEFEGYDGLLITGSMYDAHGDNQWIHDLLDLLKQLWIKRPDFHFTGVCFGHQVLSRLLGGKVGPSPTNDWELGHNAITLTPVGKRLFRTHDDKVYLHQMHQDQVLEAPTVESSNGLLEPDTDVHVWGTSNHTSIQGLYIPNRLFTTQAHLAFDEDMVKRQIQMRIDSGGIKDLEHADRAAETADLDHDGEQVASAILRLFRYDDDGMSWD	related to anthranilate synthase component II
XLOC_003004	8.52034	11.7678	26.7129	9.37335	1.56996	1.28672	1.38942	1.06739	4.6322	1.19661	6.3859	4.16972	0.702258	0.330237	0.421	0.581296	FFC1_03419	FFUJ_07843	related to integral membrane protein PTH11	MDPQTSIEESAATMTNINLKAFNVEAFTLLGIALLVTVLRSCVRIRTVGCSSLWADDYLVILAAGIYAIETGLAYSVGNIAQGLANNSMTDEQRASLQPEDHEYQLRIIGSKIQIVLWATYSSLLWILKAAMCTFYYRLTKDLQGHRVRVIIGFGFIISSFVVVQMNLLLSCRPFDHWWQIFPDPGAFCHAAISPALIWTCLAFNLATDFYLIMIPMPMLWKAAMPWPQKVGLIALFSCGLFVTMAAILRVVLLVSDPINGPQLAASWAVRETFVAIMTTNIPMLFPTFKKWAVPIVERAGSSLSIYRTPPNTIVDSRLSGALSLGSLRKSRGSSRITCISPMSPTASETEAHMNSIGLIHTIPDSSIKKPKASKTTHKIAAMRLPRIDTSAPADPDPA…	related to integral membrane protein PTH11
XLOC_003011	25.738	53.3809	111.051	63.8206	1.32156	1.44279	0.973291	0.469686	12.6092	38.2004	107.582	72.6441	0.627858	0.20011	0.682741	0.452991	FFC1_03428	FFUJ_07852	uncharacterized protein FFUJ_07852	MRFSIAAASTALLALAEARITGIKVPKEIAVGKPFEAIIVRENYIQSVFDSSIVFGYAPESQYPGTIGQVADSFALGKAESNKVEPLKKKLTIPEGATKGKGLVTAALLSIYGASGSPTISEYNVTVTFGDKTSKEYASSS	signal peptide-containing protein
XLOC_003905	0.0304938	0.0678711	0.688236	0.0154686	0	0	0	0.00712108	0.0171906	0.0613098	0.585673	0.0267925	0	0	0	0.0123341	FFC1_03584	FFUJ_08004	related to linoleate diol synthase	MSFNEKFQAGESYGDSKEDPASLLNNPEKLVADLMKDFAGVRSQASPAQLLGLVKELLQKGQPLDDKKGTTELLIGILTALPASSKARTALTNKLIDTLWGNLQHPPLSYVGGDVKYDVVNSDKPAHKHNCDLYDTIEFKVPGTDVLLREQVPQAPDGLHQYRMPDGSFNNILEPNLGRAGTPYAKSVKSEKRLHGVKPDPGLLFDLLMARDETTFQENPAGISSMLFYHAAIIIHDIFRTNRTDMNKSDTSSYLDLAPLYGSSLKDQLEIRTMEKGKLKPDTFHEKRLLGQPAGVNVMLVLYSRFHNYVADILLKINENGRFSMSVPANASEEEKAKAIAKQDHDLFNVARLITGGLYINICLHDYLRAITNTHHSASDWTLDPRVAIDKQFDGDGVP…	related to linoleate diol synthase
XLOC_003098	18.7618	29.3525	92.8257	48.6835	0.301048	0.880002	1.55599	0.656282	6.51611	9.55319	63.1707	28.9178	0.230504	0.2659	1.51274	0.53809	FFC1_03596	FFUJ_08014	related to formaldehyde dehydrogenase	MTTQAAYQAEKVIGHGDNAVTAQDVTSYREPGAGESGETMKALAWISKNKVQMVDAPKPKIIEDRDVILKVTGSTVCGSDLHLLHGTVVQLSEGDILGHEFCGVVDQVGSAVKGIDVGKRYVASFQIACGDCFFCKQKLSSQCEKTNSNTTERAMYGGRTAGMFGYSHFTGGFAGGQAEYVRVPLGDVNLLEIPDDVPDEKALYLSDVLATSYNAVKDTAVYPNDSVAIFGAGPIGQMAGVFAIKEGASQIIFVDTEPRLSFIRDHWPAEHKDKLELVDYKHLSHGVTNKPTVVSRLKELTGNRGPDCAIECAAGEYAKGWMHWLEMAVGIETDTSEIINEMIEGVRNYGRCGVTGVYVGYTNHFNIGSLMERGIRLIGNGQAPVHKYWHELLEMIQKG…	S-(hydroxymethyl)glutathione dehydrogenase/alcohol dehydrogenase
XLOC_004004	0.592017	1.02601	1.7747	2.16193	0	0	0	0	0.457597	0.442785	0.717287	0.417113	0	0	0.0622577	0	FFC1_03760	FFUJ_14277	related to 2`-hydroxyisoflavone reductase	MPSVTKVAVIGASGNVGKSTVKALLQEGFQVTGLTRASSNSTLPQSINTVKTDYSEESLLKALRGHDAVVSTASGIAPGQILPFQKLMVNAAIKAGVKVFVPSEFGVDTANPEAPKVIPFVQDKIDTLGYIKTKNGELSWIAIVSGAMFDWGLDIPGFGGFDIAARTVRLFDGGYIAYEATNLDQVGRAIAKSLKHLEITRNQHVYVNSFTVTQNDVLHALEKATGDKFQVSHGTVKGLWEAGAEQVRNGDAMGALAQISGAIYGKGGVANYSVDKGLWNDKIGLPGENLQEFVEAYIRNT	related to 2`-hydroxyisoflavone reductase
XLOC_003177	0.162146	0.144004	0.966295	1.03358	0.0344056	0	0	0	0.0973432	0.178696	0.718035	0.559387	0	0	0	0	FFC1_03761	FFUJ_14276	related to Zn-dependent hydrolases, including glyoxylases	MSLKFAIYTCQPIPTKVHSPDASSKDSGFWSPLSITLLYTPTTALVVDCPATVYPTRELAEWIKSQLPPSSTLKYFVCTHAHGDHFFGLPVLEEQFPGLQAYATKAVAEGIDLQQSPEIRDAVWANTFLPAKDGSGLPDAKSVFQALPTSNEFHLDGHLLRLYDVAHGDTHANSFIHVPKLDLVVAGDIVYNGDCHQWLGEASSSEKRTQWLAALEQIRSLRPKIVVPGHTFNPSSTPNERIAIAMLTSTADYIHGFVEELAAATSEKNLFERMRFRYDRWNLYLLAGSSKAGWNNCKL	related to Zn-dependent hydrolases, including glyoxylases
XLOC_004025	0.639752	1.10203	3.15314	0.730407	0.145462	0.407068	0.951393	0.820684	0.329714	0.855262	1.06953	0.205435	0.17154	0.36312	0.793911	1.3822	FFC1_03793	#N/A	#N/A	#N/A	related to kinesin light chain
XLOC_004918	28.7355	66.5818	99.4861	42.5952	0.431306	1.78992	2.938	2.41735	20.088	52.8652	97.7935	36.9284	0.481298	1.9678	1.87477	2.99408	FFC1_03969	FFUJ_05481	related to aldo-keto reductase family protein	MDKALQTGLSAGMSAVSGFHSKKPNWADPETAGANVLPTSYCPQPSTRVEFPSAQKPVRASHICIGAWSWGDKSTWQWDQKELPQVMLAWKTLYEAGINFIDTAEAYGNGESERIIGELVKDIPRETIVIQTKYFSTPLKAANFIHPVDAPVKSLKASLLRMNLEYVDIYLVHGPIHPQSIATIAEGMAQCVEQGLAHSIGVANYDVEDVQKINDELAKFNIPLATNQCEYNILRRYPELTGNIEKCKASGMIFQSYSSLAQGRLTGKYTKDNPPPKSHRFSSYKMEDLEPVLETLERVAERRRKSIAAVALNYNISKGVLPVVGIRNVEQAKCAIEALGWRLTDSEIVEIDKVSIVGDKTVLWQQG	related to aldo-keto reductase family protein
XLOC_004125	15.8702	73.4563	233.167	97.9883	1.9394	2.557	4.02206	5.93012	6.66523	11.0513	44.7692	9.0487	1.5325	1.03423	1.90434	1.00282	FFC1_04003	FFUJ_02574	probable ATP-binding multidrug cassette transport protein	MLGNTVDGDALRRTQSSMWQQQQQPISQQTVEGGQHNPTSSSSSESGVVQEGKWGERGQEDVTAQEAMQEFESLRHNLMSLHKTRTTDTHASKAQSRRTSTAARARSEKHEHEHDDDDGSKTDVEAGPEESEGFELGRFMREGHFEKRSEEEGSLKRVGVVYENLTVKGVGSTATFVRTVPDAILGTFGPDLYNVLTRYFPSIRIGKPPTRTLINDFTGCVRDGEMMLVLGRPGAGCSTFLKAISNNRESYAAVEGEVSYSGISAAEQKKHYRGEVNYNGEDDVHFATLSVWKTLAFALTNKTKIKEKADIPVIVDALMKMFGISHTRDTVVGDDFTRGVSGGERKRVSIAETLASKSTVMAWDNSTRGLDASTALDYARSLRIMTDISNRTTLVTLYQ…	probable ATP-binding multidrug cassette transport protein
XLOC_005068	0.438653	0.664862	1.55797	1.229	0.1832	0.174694	0.260042	0.264206	0.195924	0.241655	0.180304	0.324978	0.0773432	0.115658	0.209845	0.0158896	FFC1_04271	FFUJ_12086	probable ATP-binding multidrug cassette transport protein	MSTPTNGSVLETQKDAAIEVSVPKGLDSEGLDAIRVLLQSQALGGNDTPKQIGVSFKHLSVTAPSGTQVQVKTLPQAIINTFGPDQVRFIKEQVLARISPRNSIPEGRTILDGFSGVVKPGEMLLVLGRPGSGCSTFLRTVASRSNLATTGDLEYANVSSSVFRRDHARETIYLPEEDRHIASLTVRQTIQFALRNSLPSDARNTKLVASLVDVIAKICGLSHALDTPVGGAFSPGVSGGERKRVSIAEVLAAGSSVQCFDNSTRGLDSSTALDFVKALRAFTDIGHKTTLATLYQAGEEIYRNFDKVVVLSEGHEAFFGSTSEAWSYFHDLGFIPIPGQTTAEFLATVTDPEERRAIPGSEADSIKSSADLAAAFKRSSNYTRLVTEIDEYREKQGQE…	related to ATP-binding multidrug cassette transport protein
XLOC_004334	0.0929339	0.0743126	0.337426	0.354757	0	0.00392314	0.00484552	0.00933476	0.036228	0.023391	0.133428	0.162067	0	0	0.00839271	0.0161684	FFC1_04355	FFUJ_05846	related to ankyrin 3	MSFTSPTEQFKAYQAFSPGSSSSKPPAQSFSSRVDFSDQSYDMPYFTGSDASVLNPQTNYGSTAPKPPVADVSRGFTPKQLADAPKTKSFDKKRLSSIPSTSKQAQPSQPLKAKIDYREFLESLEFPSTTESKISQGSGDLSSSQWLVQEALFIKWRTSNGLLWLRGSEGSGKSTLMKQALESCQGPSSIHLTYSFSPSGDEARTRLGLFKALLRQLVPQAPEVFKGIKERFDKIQSCLPPKQQVAWNAQELFDELTKVVPKILRTHSVSIYVDGLNYSEGGTAPKLVQDFSKLVEKSRIPTKDPTTTHRLRIIFSSTPYPMKDPFPRSCIQVDEKNGPSLKKHLEGLLSNIDLNTQLLVSTKAGSSFISARLIVNHIKLFGPGQSSLVQQPSPTPAPI…	related to ankyrin 3
XLOC_004373	2.93341	5.01731	14.3568	3.69814	1.08895	1.99981	2.88306	1.67602	2.81311	2.14448	9.11713	1.65404	0.571033	1.05516	1.81266	0.641973	FFC1_04417	FFUJ_05908	related to protein yhhW	MFRVSPLIAIFVAAISILIIIYPSNYIAHIQQLTTNIFTNKTTTITSTTQSQMNAAKNMSKSLRHAKITPHRSNSRGHSDHGCHFGSLRVLNEDRVKANSGFPTHPHRDFEIFSYILSGELTHRDSMLTKGKEGGQSDKFYRMHRGDVQFTTGGTGIAHSEFNEHKSDTVHFLQIWAIPWKRGLTPRYHTRHFSDESKRQDFVKILSPLKGGEEATVQQEKDAEPVIPDTIPIHADFVMAAGIIEPSKKFEWTVGGGATEQTKRKVYVHVPMTKGGRAKIRLDGREDSEIQEGDGAFIDGVNAGDKLAVESIGEAEAEVVVLDTA	pirin (iron-binding nuclear protein)
XLOC_004390	20.0435	114.442	608.548	203.886	8.84749	10.3395	12.7497	11.8434	10.4843	20.5139	301.337	120.042	4.26902	6.11394	11.8655	7.23484	FFC1_04443	FFUJ_05934	uncharacterized protein FFUJ_05934	MSGHSNVGNRGVYEAGDQRNAPESERNVENPYNEGKENSHNNLDSKDERSIANRLAAEEQRSEPDDDLETAQLKKDPTLPARAHGNEPSKGAKVDAQLQAEEEEELKRKGKA	uncharacterized protein LW93_1076
XLOC_004420	198.925	238.267	782.788	575.773	52.7144	68.6629	94.2275	90.3036	90.7073	99.529	60.2352	32.8665	16.12	9.51021	41.3674	30.9125	FFC1_04494	FFUJ_05984	uncharacterized protein FFUJ_05984	MSSKLIPSDPDHVMVIRNVTPNIATFSVPFSRFGKVKIGGRGTLVKLTSGGLAIFSPVALTKATQAKVMEMGGDVRYIVALDYEHHIFLSEWKKAYPSAKIIGPEGLPEKRAKQTDDPKINDDEFAVVFKKENKREIKIDPDFDADFDYEYVDGHANLEIVFFYKPEQVLIQADLLFNLPPTEQYSKVPESELPADGAVGKLFACVQNPRGDTKWLQRFNWYLLAKNRESFNDSMAQIAKWDFHTMIPCHGDVLEGDGKEVFMKVFDWHLQGHK	uncharacterized protein LW94_11934
XLOC_005258	3.69947	7.78971	24.5654	5.98203	4.47929	4.74919	7.16131	4.59182	0.495055	2.14856	1.93508	3.0878	1.54698	0.287849	6.35498	2.09548	FFC1_04610	FFUJ_06096	uncharacterized protein FFUJ_06096	MEVQSATPTGPWQDQLDSVCRDAQLRPPVFQIVSDRRGGRTAWSSRVTVHGKTLAARFWYDGKNLNNAREDAAECAVKWLTGSESSSPTQQWGW	uncharacterized protein FFUJ_06096
XLOC_005292	5.11909	5.85485	18.7547	12.1593	6.75207	7.08247	7.13256	8.31823	1.39826	0.804473	7.75875	4.16245	0.359973	2.01227	2.62126	4.75278	FFC1_04676	FFUJ_06160	related to short chain dehydrogenase	MSKPWIFVCPSTRGIGYALTRHLLQKTSLPVLATARLQHDPETVKKSLLEGLPEKEGLTKRLSIVHADVTDEESLINAASRAAELFPPDKHHLRLACAIPGALKPEKNVNQIDAEASLAQFRINTMGPLLLIKHFDKFLPRRSSELEDSPKSDEVKMPPYSVWLSMAARVGSTSDNRAGGWFSYRASKAGVISLGKSYDIFLRGRSGDKAISIAYHPGTVKTDLSKGFWESTKEGKLFSPEFAVDRLVKVATGLPLEGRGKCMDWNNKEILP	related to short chain dehydrogenase
XLOC_005317	140.79	283.415	441.224	223.201	14.4263	28.7418	33.2477	43.5451	87.8196	135.779	301.353	104.672	6.06043	22.8799	17.0152	45.2853	FFC1_04714	FFUJ_06194	uncharacterized protein FFUJ_06194	MPRNGDGSSDNGPFEAADHDIAHGVGKPDSDRVDRADKTADLPEGKDEHGQGLQDAPASGGQSQGIKQGKDVGQGN	glutathione s-transferase
XLOC_005384	695.308	3043.86	7814.47	1628.58	14.1965	26.5263	35.4994	15.8936	340.913	707.326	1347.52	217.4	0.925541	9.78157	26.8644	2.33343	FFC1_04836	FFUJ_06304	probable glucose repressible protein Grg1	MESLKQAGNYVAETVQQATSGASKEANKEVAKDGNVPISTRATAAKDALGDKIDETTHDKKADVHKEAI	probable glucose repressible protein Grg1
XLOC_004690	13.2585	57.3146	138.833	41.9468	12.1284	18.8268	35.0445	4.99344	6.67486	23.1134	17.5705	9.30942	11.4724	15.6042	46.3486	2.47108	FFC1_05009	FFUJ_06474	related to Cu-binding metallothionein	MVVNTPATCCRSGDNVECACAQKATCSCGQKSALQCTCSKAASENTVNGPRCSCRARPAGECTCDRAATENATPTGSTCACGSRPAGGCTCEKAADGGFNPANEIDFTTKK	related to Cu-binding metallothionein
XLOC_004740	7.34944	13.2897	33.4006	18.1022	0.74808	0.811634	1.12891	1.54065	2.12118	4.61745	16.5248	7.44878	0.51849	0.6256	0.712383	0.375755	FFC1_05108	FFUJ_06570	probable thioredoxin peroxidase, mitochondrial isoform	MASFIPRSIPSISALPKRANWAPATMPPLAQPMARRFLATTTQEQPRLRLGSTGTMNASQLRKPCTDALTAPNFKALTTHGEINFHKYIDNTWTILFSHPADFTPVCTTELGAFAKLKPEFDKRGVKMIGLSANDLGSHDKWVDDINEVSNTNLQFPIIADADRKVAFLYDMISQQDLDNIAEKGIAFTIRSVFVIDPSKKIRLTMMYPASTGRNSAEVLRVIDSLQTGDKKGVVTPIDWQVGDDVIVPPSVSTEDARKKFGDVREVKPYLRFTKA	AhpC/TSA family thioredoxin peroxidase
XLOC_005561	0.0847929	0.144725	1.13656	0.374832	0	0	0.0309951	0	0.113391	0.154924	0.993098	0.385652	0	0	0.0536854	0.042515	FFC1_05178	FFUJ_06628	related to NAD(P)H-dependent oxidoreductase	MATHHAKNEVLKAAALFDVSHITAVVTGGATGIGLMITQALQSNGAKVYITGRRKEVLEQTQKTYGTGPGSIHVLPGDVSEKDEAIRLAEEVGKKEPNGIHLLVNNAGIAEDDNTKFSSAGEPDMSDAKALSEHFLKTEPQQWAATLKTNVTGPYYMSMAFLPLLAKGRETTSGYSSQIINVSSISGAMKGSSMGQPAYATSKAALTHLSRMIATLTKDVKVRVNVIAPGLFPSEMTTGESDEGNKSNIDKKMTNPAGRPGHDTDMAATILFLAGKGGLFYNGQIVYPDGGSTLINPAIAN	related to NAD(P)H-dependent oxidoreductase
XLOC_004810	0.691517	1.44963	3.29239	2.49193	0	0	0.0239094	0	0.184294	0.201263	1.52892	1.13451	0	0	0.0414125	0	FFC1_05236	FFUJ_06684	related to Zn(II)2Cys6 transcriptional activator	MSFQPYSEQDNDEESSPRLNGVHSDEPRPEKRKRTSKDDPQGPSCSLCRRRKAKCSRDQPCGTCIKLGAECIYDQEKSKPGMRAGAIETLTQRVATLENMFVGQGVLWQQIWNSINKPNNQQYGQTPDSHPEVSIQQIASDVRRHLAELPLSEIGQQVDSVVEGIQPGSTFNATNTHQSKNNFGLQHQVNLGTLPPDDLVDSMVNIYFNQMHPWIPMLHEPTFRGLLSNPSGRARVSTILHAIVSLCIRFSDDPRLQSAPELRAQYSTSCRQTVILASMESFSVENLQAMTICAFDIIGSGRGPSAWSIVGSMSRTVEQLRLSTEEEETQSHQSRSKALIERVAFLPPAATWAEVEERRRIFWNVFLMDRFCSICTGWNLSLTSADVTRRLPCEGAIWE…	related to Zn(II)2Cys6 transcriptional activator
XLOC_005815	6.64595	14.8061	27.0253	33.0454	0.0483452	0.022649	0.0458542	0.0192119	1.36953	1.23323	3.99931	5.26835	0.0431013	0.0392293	0.0398254	0.0332761	FFC1_05684	FFUJ_14683	uncharacterized protein FFUJ_14683	MPGKVNLSKLDSGTFYSFHNNKSKTGPEVDIHHQYWNQTVGSTLKRFLASAGYDSESQYRILDQFSNLVAPSLGSSPVRGEPKWKSFMTDNNCPVELSWDFHTGSSQPTIRYSIEPIGLEAGTAADLHNEEAAAKFVRRATQVFPDIDTAIFSHFYQYFNGQWNADRPEGHQSTMFWAFDLKESITTNKAYFFPGLVAHAMGKSTLEVVADSITSAPGCRPENISSFASFAKFIHERQHLGLEMDMLALDLVPVENSRLKIYFRDRRTDFRSVTEIMSLGGRIHGEEFEVGMRNLRKLWGALLGMTGVPEDIPLPHKNHRTAGILYNVEFRRNSRTPKVKIYIPVRHYAESDSQILEALGCFLEGQISKLPDVVINSVWTKRYSECLYSIFGEERLLNG…	uncharacterized protein FFUJ_14683
XLOC_005897	3.73059	3.23264	16.5849	10.8277	2.48719	2.1299	1.89355	1.94422	0.968878	0.500848	6.46987	5.56079	0.0378768	0.510334	0.852394	0.385167	FFC1_05833	FFUJ_14546	uncharacterized protein FFUJ_14546	MAADDDEKHMQGHQHEFAHDNHDDWETQPPYTRPDEATEKRENFEKKVHGSCHCGRVQYWLNSDKPLASKYCHCIDCKKIHGAPFQWAAIFKKTDLSFENGVKNLRFYKTTSKKNEHVLPCKVGCAECGSWIMDEGRNMVLLFPTLLNLDTPELRENFQPQCHIFYTQRVVDIPDGKDKWTKLDKDSELMEDVDQVDDVARKRRR	Uncharacterized protein LW93_9926
XLOC_005917	0.206689	1.1039	2.21449	1.32532	0.411589	0.47754	0.802787	0.378617	0.195274	0.563049	1.66584	1.57504	0.107223	0.210818	1.18203	0.464362	FFC1_05867	FFUJ_14510	uncharacterized protein FFUJ_14510	MARFLSTLLLGAQLILSASSHSIPNTLPRRSGQHEFPYPVLGTDEPADYATTGYFINHFAISTRNLTASLDFYSRVLGFRKMFTLHVSKKYSITYLAHAHGGKNGTGYQTALELNREKNNAQGLLEIYYLDIPTKNIESSSQHPNTFAHIGLVVPDAQKIQERLETMPNVKIVKKFGEKFTELTDDLVIGPAVGLPPAVVAQLSLEEREAIVQGLESSVDPLIFIVDPDGNFIEIQGEEGADLVQG	uncharacterized protein LW93_9960
XLOC_006226	9.01863	20.3408	52.206	16.8821	7.44739	7.7972	12.2929	5.41591	4.48528	9.03726	9.52608	4.11471	4.1172	5.18487	9.58626	3.45963	FFC1_06444	FFUJ_13183	related to CYTOCHROME B561	MASATGVPERFPPIEDLSARETEPLLGRPGDAAQEDGVPLIKNLVLGTGIVAQLGVVLLTILIWASVLSKPLILFSAHPLLQSLAVLTLAQSVLSLQPTHTAEQKRVGQRVHASLNLAAFLVLVAGVTIIEYNKIANNGPHFHSVHGYLGVITSIVLLLQYGVGFTMWATPALYGGVDNAKAVWKYHRWSGYIIFVLLLATVVSAVETDYNYNVLKIKLWAVLLLAIFTLVGVVPRIQKHKLGFPGPGST	related to CYTOCHROME B561
XLOC_007073	2.79646	4.62249	14.9848	9.65475	3.83323	5.22034	5.0904	7.58845	0.925726	1.41746	4.64186	2.55427	0.912626	1.89624	2.25747	4.9015	FFC1_06466	FFUJ_13161	related to YER185w, Rta1p	MSSSGERPIDGYVDPNFPNPDGEWDTPVIIYGYTPAFSLAVFAAAWFALFLVVHLVQTIRFRSWYFITFPIGLLFEIVGYVARSLSAKKDPYHLLYFILNYFFIVTAPVFLAAGVYTILSALIPRLGRRYSFLPPKFILWFFITSDVIATVVQITGAALIGVRQSNRDDPTDANNILLGGLAYQVFSLGVFVILTASFLFRARREVSSRGKKLSLFCVAFGVATIMIYLRTCFRLAETAEGLGGHLYSNEIFFACLEFAPVALAVLLFAIWHPGRCVGKKVRVQDLEKEQARAQDF	related to YER185w, Rta1p
XLOC_007085	29.0715	37.0645	83.2229	47.7764	30.4425	34.2547	53.8168	38.8422	15.3355	6.44817	42.9991	6.78004	3.00267	9.69766	33.5702	13.7325	FFC1_06487	FFUJ_13141	related to SGT1 protein	MSHITLAQQGLAAAEVRNWDEAIEKLSAALKASQNPAWLIARSKALINKKRFQEALDDANLAWHTAYQRNKRPLLIDAHYRRAVAHFRLGQYANADACCVYAMRLVKGFPAVEKEDPAKKNTDENGFYKVTLKDAQEESKTDEINKRQAGAAGALGAESNNVANAKEWRIASTLRMQILFAMDKLPEDDPARKLTTANKPELKELSDVGSKKVETKESAAATKTAPKPTVPADTPVRLQEFQNDTTMTVSIFSKGVNKEKLQVQFSPKSAHLDSIIWPSGDEKPFTLDLWGEIDTDASTYRVTPNKVELALKKKTPGKWAQLKGEAGDYAPDAAAAEEAEKLKVLKDARKKAMDDAAAEASARKETAESTEAKDKAPATQDSSKPAYPSSSRTGPKNWD…	related to SGT1 protein
XLOC_007284	0.146047	0.353194	0.978872	0.873243	1.34397	2.31462	1.98076	2.1329	0.0907458	0.112993	0.811456	0.428877	0.154522	0.968916	1.07213	1.20302	FFC1_06910	FFUJ_02524	related to glutamic acid decarboxylase	MGRMIDGRLELTDAIELEVEHRPSLVLLGGTDINSCMFTYVPASVQRYCIEHNIRLSDSDLEKINQLNLHIQDIIHRERVYYIYGFPLQNCPHGRFIEPGKTVFVLHTLNGNTQSTMENVRGLLDRIEYLGRALLIDRQYICMGDTRGSSTNRLERAERKLTQKLYDLFDDKDFVAVVYVFRSVMEGEGILIDSEIPLHRRLLVTFEFAGQAAESGPPLDEAGHVSSISSTPEYLSSDEMLRRLAFNVLTTPNKIIAATTGGTNRLKSLETTAARKLVTAIQHLGQSEVSTADEFVNLVMSDGGQGKGKHLGYKPRHGVLEKLRKIFHDVQKNLID	related to glutamic acid decarboxylase
XLOC_008036	46.2532	75.0096	168.927	84.6223	48.3701	57.6784	65.7314	42.0768	9.78518	23.1538	8.33436	8.67324	18.1043	18.9774	20.563	13.6394	FFC1_06967	FFUJ_02582	probable succinate dehydrogenase (ubiquinone) flavoprotein precursor, mitochondrial	MASSMAMRRLAVGPAFTRAARFPSRAFSTTRPVARVITGNGPLRAKEASPFVSNKYAVIDHEYDALVVGAGGAGLRAAFGLAEAGFNTACISKLFPTRSHTVAAQGGINAALGNMHEDDWRWHMYDTVKGSDWLGDQDAIHYMTREAPASIIELENYGCPFSRTDDGKIYQRAFGGQSKEYGKGGQAYRCCAAADRTGHALLHTLYGQSLRHKTNYFIEYFALDLIMQDGECRGVLAYNQEDGTLHRFLANHTVLATGGYGRAYFSCTSAHTCTGDGMAMVARAGLPNQDLEFVQFHPTGIYGAGCLITEGSRGEGGYLLNSEGERFMERYAPTAKDLASRDVVSRSMTLEIREGRGVGAEKDHIYLQLSHLPAEILAERLPGISETAGIFAGVDVRKQ…	probable succinate dehydrogenase (ubiquinone) flavoprotein precursor, mitochondrial
XLOC_007631	3.64297	2.36823	12.7862	9.57391	5.2364	4.20834	3.94561	3.97741	1.16104	0.510247	3.95573	2.76406	0.053179	0.357971	1.00478	2.24449	FFC1_07528	FFUJ_03105	related to deoxyribodipyrimidine photo-lyase PHR	MAKPRVIYWFRTDLRLHDSPALKAALDLDPAVLWPIFTWDPHYVYRARGGLNRWQFLLDCQNDLSRSISQVNPKSKLFVLREAPQTLFPKLFKAWKVTHLVFEKDTDSYGRERDSVVVQAAKDAGVEVLVRSGRTLWDSDQIVEKHGGKPTMSITQLQTAGSKLGEIRKPIPAPKHLPDPGDMPVNFEQDEPNTEPDFNAGFRTEGDEAYTRIAGPNDDFAIETMEELGFPPATTPHRGGETRALKELDKLIADKKYTATFQKPKTNPAQFEPQATTLLSPFLHFGALSVRLFYWRVREIVDSYGKGASNPPESLIGQLLFRDMYFAAQAALGYVFSQTANNPYCRFIPWHLPSKRDSETGLITGEYHIDSEEAEIWFRRWRVGMTGFPWIDALMRQLK…	related to deoxyribodipyrimidine photo-lyase PHR
XLOC_008443	13.3886	18.4962	59.6254	21.3631	29.8025	30.3339	26.9829	25.0658	1.75453	2.10153	12.9051	1.26089	2.86507	3.62816	4.58886	4.50878	FFC1_07693	FFUJ_03267	related to DUF1295 domain protein	MSLPFVKSIEDCGEYAKTVQPYIPQLYALPRQILDNIASPDGLRQIYVDTNPLISGFAISIALGFVFLVVSEINRNYSQVDRMWSILPNLYVVHLSVWARLAGITSSRVDLIAAATTLWSCRLTYNYWRKGGYNKGSEDYRWAILQKYVPRFVWFLFNITFISFYQSVLLFSFSCVPAYAILCSTKFEQDVTSADIVFALIMVGLVYSEWVSDGQQWDYHAAKHQYQSEAKVPKKFRYSQAELDRGFNTSGLWAYSRHPNFAAEQMIWFVLYQWSCFATKNIYSYTFAGAAALILLFQGSTWLTELITAGKYTEYPMYQKQVGMFLPKSLTPYTTPGPKVIRTSDIAKRMESKKQA	related to DUF1295 domain protein
XLOC_007790	65.2977	77.7946	207.318	151.293	22.7876	23.7225	58.2975	88.2054	50.8218	47.4921	103.63	63.1364	9.74137	6.81216	56.3073	89.5546	FFC1_07838	FFUJ_03404	related to alcohol dehydrogenase I-ADH1	MAQSIPKTVKQWTIPSRDGKDFSGLKFSEESVPELGDGQVLVKIQGASLNYRDLILPLGKYPFPAKDGVVPGSDGAGTVLAVGKNVTRFRPGDKVVTLFNQGHIGGSLDQLSIQTGLGGVTDGTFRTIGAFDEHGLVPMPSNLDFHEAATLTCAGLTAWNGLYGLEGKKLLPGQWVLTQGTGGVSIFAVQFAKAAGAKVIATTSSAEKAKLLEKLGADHIINYRETPEWGAKAKELTGGAGVDHIIEVAGPTSMKQSLNAIKIDGVISIIGFVGGTDKSDPGFLDCLSNLCTTRGLLVGSRAQMEDMCRAVEANPDKLRPVVDPKIFSLEQLREAYEYQWSGKHQGKVCVKIE	alcohol dehydrogenase
XLOC_008529	0.648955	0.726845	4.05091	1.38666	0.0954178	0.104074	0.187719	0.200976	0.283791	0.39428	2.32016	0.582916	0.0555248	0.185568	0.038635	0.193709	FFC1_07840	FFUJ_03406	uncharacterized protein FFUJ_03406	MVTVAVAGGTGKVGRTLVEAIVAAGEHKVVILSREENKILEEEIGAPVLAVDIHNIDALTQLFEKHNIHTVISTLGMNGPEPIEIDIIRASEASQATKRFISSDWGLPHTEEHAAQANSANNKLRAQDELRKTNLEWTSIHIGFFLDFWGSPKSAAKSNLHTPSTFVDIKHRAAAIPGSGDVPVTFTYSRDVANFVAALLNLEKWDEATYIIGDKVTFNELVKIAEEATGDKFSVVYDSVKTLEKGELSELPGHEAMFANIPAPKAVMKKVMSAYGLWAETGGFNLDESKALNKVFPDIKTITVREFLEDAWGNEKK	Isoflavone reductase like protein IRL
XLOC_007791	0.301139	0.509992	3.20657	1.07062	0	0	0	0.111402	0.316117	0.410165	1.00949	0.492521	0	0	0	0.281157	FFC1_07841	#N/A	#N/A	#N/A	Vegetative catalase
XLOC_007793	3.38871	18.0658	101.843	51.1837	2.0346	2.65896	2.81326	7.26938	2.42501	4.798	22.03	4.36973	1.13721	2.97578	1.9409	8.42547	FFC1_07843	FFUJ_03408	probable gibberellin biosynthesis-related	MARTDAEIKATIKAVVNDFRGWDLAPIMHYPNEEGLEFEDIYFPSDDGVPLEGWFIPCKGSNKIIIANHPHWFNRAGIPSHLEPWNQLMPGNDFEVNFIPDYKILHDAGYNVLAYDLRNHGLSGSGNQGLFGFFEWRDVLGSLKYVRGQDDTKDMTIGLFSRCAGANATLSAMRHRPEAFKGVRCMIAPQPISAGSSIAVMLDKMGAPASYMEEADRQFFMKTSFHISQLSPPTDAKHANVPTFLYQVRDDPCTTPKDVQSVYDNIPIQDKKLKWIEGTDKRWDGYTYFQREPDQFLEWFAKYMN	probable gibberellin biosynthesis-related
XLOC_008535	0.628971	0.342495	8.01921	1.4007	1.19756	1.67042	1.01315	2.60421	0.698074	0.264045	3.14035	0.771111	0.247102	0.351865	0.477763	1.38123	FFC1_07854	FFUJ_03418	uncharacterized protein FFUJ_03418	MSSDGLQDAPSAEFQDDSYVSRPGEKEQPIPVQSDSDRVEDPIDGEQADTDAQLERDDKDAIDESNILEERTRGAAQPSGTYQEPGDEEGLPSDTGRSSNY	uncharacterized protein FFUJ_03418
XLOC_007821	7.34712	35.7929	98.1644	20.9914	0.397062	0.913689	0.991824	0.442051	3.57958	12.4393	50.6066	6.54252	0.206008	0.358322	0.904343	0.272722	FFC1_07888	FFUJ_03452	related to xylulose-5-phosphate/fructose-6-phosphate phosphoketolase	MPGEVIDRPNPAPLDSHLPDVALELALKAPKKQLDKKIAQSLNDFQHAACYIAGSMIFLKDNVLLERDLKARDIKPRLLGHWGTCPGIILVWSHLNLLIRNHDLEMIFVIGPGHGAPAALASLWLEGSLERFFPQKYGVSKDGLRNLITGFSVPGGFPSHINSETPGSIHEGGELGYSLAVSFGAVMDNPDLIVTCLVGDGEAESGPTAAAWHSIKYIDPAESGAVIPILHVNGFKISERTIYGCMDNKELSSLFAGYGYQPTIVENLEEIDSELSGALEWAVSEIKKIQKAARDGKPIIKPRWPMIVLRTPKGWTGPKKVDGEFIEGSFHSHQIPVPNASKDEEHLKILQDWLKTYDTAHLLKDGKPAESILEIIPQKDEKRLGQLKKTYDPYQQLKV…	related to xylulose-5-phosphate/fructose-6-phosphate phosphoketolase
XLOC_007834	3.83078	4.61201	11.6887	11.5275	4.03659	4.99439	2.74772	7.28867	0.927466	1.51763	2.54362	7.69945	1.19905	3.52642	1.5842	4.02854	FFC1_07906	FFUJ_03469	related to integral membrane protein PTH11	MAPLAHDPSGFLMEPPAGQTRTLVNPPSSGSGVIPCGVTTTIIASIIVILRVFTRRYVVKSVLGADDYLCIAGLCFSFTFLGISLTLLNLGAGNHMWDIPVAEYVPKFWQTSIGATLTYAASISLAKLSVLSFYLRISPDRFVRRAVHVLMALVCSYTFVYVCLAVFRCQPVSAGWDLTIEGKCIGMDVLVIFLVICSVVIDTFVLLLPIRIVQPLQIPTRQKISLTVLFATGGVIIVVTIRRATITLPILDAPDYTWALPRQLILSFIEVNTSLVCVSVPALKPFCVRYVPFLIHPRLRSQEKNSKKSNSHSQEKRKSHTVDNDSYEMPHRRDFGGENPQEDETHLCPTIPEHNAALESDGAMDTESVNSSADQVPPVSAKPKPALASFSTKRSQSVN…	related to integral membrane protein PTH11
XLOC_007875	0.193482	0.15898	1.19821	0.497529	0.0297455	0.0755588	0	0	0.209826	0.0674319	0.639579	0.234942	0	0.0738629	0.0541839	0	FFC1_07995	FFUJ_03556	related to haloacetate dehalogenase H-1	MRFFQLAFASLASVVAATSSFDTWAHGRVALQDVSIHFRYAGSGPPLLLVHGNPQHSLTWQFIGPILAQNYTVIAPDNRGAGDSSVPPDGNYTAAASAEDLKGVLDFLNITSTYVFAHDKGVGMATALAIKYPDLVKRLALAEYVLPGFTYEQSSNPAPFWDLYQNWQLAFFQVPDLAEFLMSGKEKQFLQWYFYHGSYSGVESFSEETVNRYTSSISKPGFLRAMLGPFSSSTVYQDGNFFKAALNESRLSVPLLGMGGEASLGLKSILKQTFEPVSSDLEIDVIPKAGHWVADENPQWTAKRVAKFFGEDDDSLQKVDLGYLDDLVTLDVGFYGTRRNFALGTQ	related to haloacetate dehalogenase H-1
XLOC_007884	0.248781	0.548297	2.25544	1.16209	0.102571	0.142006	0.296667	0.837939	0.164549	0.314677	0.209029	0.34608	0.118463	0.0752875	0.0217069	1.31908	FFC1_08012	FFUJ_03574	uncharacterized protein FFUJ_03574	MAPQPHSVLMHLLQSGEYSDFKMVCKDREFKLHQMIVCPQSPVISAALNGGFEETTSKVITVNEFSVRTVQYMVAFLYGADYRLAPEPERKPAQHGQGEKREEGEIVSGDEELSKVLPPASQKIAAQTVYQIVSHLRVNAIADYYGIAKLAKLSTSKIENILKKEMDFHIIPQIIAEMSTANRDSEIRSVIASATARYIEELASSQVLRTIDLEHHLTIEILEACGKRIQKLVEDLSAANEASNKYQEVIRKLEGDRDLTATKVRAIMQQLNTTPKCRNCKKDFLSFIAEPANVLAETSRSTRCPARVRLDETLKVF	Speckle-type POZ protein-like protein
XLOC_007890	0.29101	0.428778	1.19566	0.853717	0.212783	0.284081	0.176612	0.317244	0.0227313	0.299067	0.100764	0.185333	0.0986693	0.0488685	0.103312	0.212109	FFC1_08023	FFUJ_03586	uncharacterized protein FFUJ_03586	MTPVICKQPDERVIYQATKHVFVGKYAKLRDRGCVRMSINNNLRKGSLVQEVVTQHGFDAVAQTVLKLLSDKVYESDMVVRQRFPDLYEPASVQTAVRKQGEAEATRAEHVAVEVVEQTNLVNGQDMRHTEEDITTVNDSRDGSACDIAGISLSFPVYLPFPTEHLLMEKLQKVLEAACYEYGVRELSSILQERHWDCPEAVELSQWAELLGNKGNLKRQDSDRSLKELLHSIAQIRHTAVHRLRTSSVGLQRFLADAEDLTRALGDNLYIQAIAKLNLETQSTLTELAQNKQSIQLRLEEAQEEIAKQRAELDQKEQDNLRRMEREDMRYCAQAGERLGKALHLVGKFAVVPESEDPAMGGMDSDNACPASDTDSNLDHAEHFEDCSES	uncharacterized protein Y057_6537
XLOC_007939	0.370803	1.10073	1.83012	0.971975	0.493648	0.508222	0.594927	0.749036	0.136366	0.0671574	0.1847	0.463455	0.244915	0.101187	0.504063	0.499023	FFC1_08118	FFUJ_03675	related to hexose transporter protein	MVQAQASLALDDQLAAGWFGWLTNKGILKLNAILCLSLISSYATGYDGSMMNGLQSLDTWKASFNNPDANKLAILNAIQNIGQLAALPFCAWFCDKYGRRPGLVVGATIMLLGVGLQGGAQNTGMFIAARGILGFGLALNITAAPVLIMELAYPTQRAPMVSIYNTLWGLGALSAAWITYGTFRINSDWAWRIPSILQALSSFLQLGLCFLIDESPRWLVAQEREPEAEKLLIKYHANGDSSNPAVAVEMEEIRTAIRLENDAMNSTSYLSFFKTKGNRHRFFIILAVGFFSQWSGNGLISYYLTLILNSIGYRSQETQTLINALLTVWGLFWGVVFSLLVNRIPRRALFLFSTLGSLATYVVWTALEATYEMSTDLNEDGTGGPSGIAKGVLAMIFLF…	related to hexose transporter protein
XLOC_008750	0.0689636	0.103647	0.480255	0.11449	0.0385121	0.0155524	0.0384181	0.0370057	0.0674656	0.0437304	0.263803	0.122095	0.0332074	0	0.0665422	0.0640961	FFC1_08271	FFUJ_10092	related to quinate transport protein	MGWNTHASGTNDPPEVRNWRIHLIATVASMSALAIGYDTSVIGGTMALTSFMRDFGLDLVEKTQRDTIQGNIVSTFQAGCFFGALLTFPIAEKWGRRKTIMGAALVFLLGGALMTAANGNLNMIYGGRAVAGLGLGASSLTVPVYISETAPPSIRGRLVGIFEIASQGGGMLGFWINYATDRTIDVNTKTQWIVPLAVQLLPGLGLALGMLWCPESPRWLARGDHFEAAEKILAQIRGLPAEHEYVRREMGDIRAQVEERSTNKMSKKQQFKKLFQKGVRNRMGIGMALMFLQSFTGVNIITYYAPRIFESLGIPGTSLKLFSTGFYGISKTLGMVLFTFWVVEKVGRRKGLIWGAALGCIPMWYIGGYVMEADPAAAAAAGVVNRDGWGYLAIVCVYI…	related to quinate transport protein
XLOC_008776	0.0422655	0.0643762	0.152851	0.139399	0.283675	0.271613	0.319389	0.438903	0.0196166	0.0215601	0.0199684	0.0530688	0.231433	0.215152	0.228341	0.204883	FFC1_08320	#N/A	#N/A	#N/A	uncharacterized protein FFC1_08320
XLOC_009327	0.176887	0.160799	0.682351	0.513611	1.13856	1.85679	2.53003	1.36383	0.0971835	0.0556246	0.244399	0.179114	0.360234	1.31634	1.26196	0.528724	FFC1_08370	FFUJ_09993	related to PMR1-Ca++-transporting P-type ATPase located in Golgi	MSDPDIRGTKESDPEAQIQRITFQDGPERGREDHDAHRLGRTLSRSLSRRRSHSSSRSRIHPTSPYSGVQIEYRTLSIQVTEAKQVEPTEDSKTAGGQKTDEDYFSKLQYHELQTEQLCQQLNVDVGAGLSESSAATRLERDGKNTLPHPKTNYIKRTLKYIFGGFCSVLWVGAIIFFLCWQPLSNPPSNQNLSLAVLILIVIFLQAGFSAFQDWSTAKTMNAILDLLPSFAMVKRDGELKSLPTVGLVAGDVVHLKVGDKVPADLRIVSHSGDIRFDRSVLTGESDEIEGAVDATDANFLESRNIAFMGTTVMNGNGIGVVILTGGRTVMGRIATSTSGVKDSAALIQREITRFVMIIVCMTIILALAILLTWVGWLRVDHKAYMSVPAMLVNVMACV…	related to PMR1-Ca++-transporting P-type ATPase located in Golgi
XLOC_008858	0.0799223	0.423872	2.28229	3.9929	0	0	0.105174	0.110601	0.134472	0.307326	2.12337	2.32061	0	0	0.182168	0.172841	FFC1_08496	FFUJ_09870	uncharacterized protein FFUJ_09870	MASQNPQTPTNSTDERKPAKCRGLMLAPYIYDTNSVQEHLLCRAEATNTAPESAKNVSEIARQENYGGFEVQDLDSMMQEPSSMKSRL	uncharacterized protein FFUJ_09870
XLOC_009416	12.9572	24.0209	45.253	20.92	3.15521	4.83718	5.48356	3.36155	4.37319	2.0381	8.81778	0.571945	1.2339	0.744857	1.04949	0.622905	FFC1_08524	FFUJ_09845	related to putative transmembrane protein	MSQFEQQQIPAAGQHYSAQNRVPNVRQFMDQLDQNKKARDAEIDEQLKQNKIHGETKDHKNDRAEALRKQKDIRTVRDPVTGKDVGIRDADIDYKEAVENPQLSIPNENLGKPATIATSSKQSGEEYRYAQDVTAPPDPVQEGATSDVPIRSEKTSVVFYKTPSVSYEPMFEILEQRSNVLCIGIFAAIVFIGKMFGGRLLGLIPLGFCVASGVFLWTKDLIRQGRDLEWSSEQERGETATANLIPESVEWMNTMLGVMWGLINPEMFAGVADTLEDVMAASVPGVIENVRVADISQGNNPIRILNMRALPDSHVQDIKDEQHRQNEKTTDPEELAANEQAGSFYNLEVAIAYHAKPSGADIASKARNMGMQLVFYLGIKGLFGVPLPIWVELQGLVAT…	related to putative transmembrane protein
XLOC_009460	0.232198	0.81734	1.83386	0.726041	0.523999	0.241758	0.240014	0.378611	0.255066	0.349765	0.708476	0.0974751	0.725448	0.257621	0.363097	0.333909	FFC1_08598	FFUJ_09775	uncharacterized protein FFUJ_09775	MCGNSSQDEHPTVNDEDSDYGTSQTDIAKEKRNRHIAAKTVLKGYDGGGRKQDLNLK	uncharacterized protein Y057_11909
XLOC_009547	0.561127	0.743088	1.93911	1.9807	0.174702	0.290066	0.104301	0.149582	0.275168	0.141544	0.815038	0.406107	0.10614	0.139149	0.0514606	0.0694423	FFC1_08741	FFUJ_09643	related to protein involved in biosynthesis of mitomycin antibiotics/polyketide fumonisin	MPTNGNKVNGIMVEHGHTRLFKISPPPSLDAFRKLCSQKATKEDYPLAADIKENVPVYNLSNFSTLTENQKSALKDEWYKVLLYGPGVFVTAGLYTNLDVVNKSTAAFNDIIKKESQGTKTAGDHFASAGKNDRIWNSFGKHGLQDPDSFFNYFSNPYLDLIFSSWLGPGYRITTQVNNVRPGGQPQVSHRDYHLGFMSAETCGKYPRAMQVASQCLTLQGAIAHVDVPLESGPTRLLPFSQAFAPGYMAYRLAEFNEFFLDNYISLPLKKGDGLWFNPALFHAAGENKSVDINRLVNLVQISSAFGKPMETIDALPLVESTWDVLTTAYRAQGLSDEIQMFIAAIGEGYPFPTNLDNNPPRNENMAPDSEQDIIQVALINGKSREEVLADLEGFRQRV…	related to protein involved in biosynthesis of mitomycin antibiotics/polyketide fumonisin
XLOC_009044	0.832866	1.48682	4.73955	4.04607	0.527792	0.263304	0.796897	0.504164	0.498474	1.43274	0.995563	1.76578	0.583797	0.295451	0.406401	0.332758	FFC1_08876	FFUJ_09512	uncharacterized protein FFUJ_09512	MTTFSSIPPYILGGACVSRGVMALLSPRKEYGHVGLLLEPSKTNTEGGSVSPLMYFKGLREISYGLTLMALQYQGNESAVTTFSAILSTVRLGDGLVVWMNGGDELRYKAAGHWITGLGFVGWVIWRWSY	uncharacterized protein FFUJ_09512
XLOC_009094	62.499	96.1301	232.72	96.9448	6.83253	9.79659	12.5129	12.8515	12.6999	36.3513	127.632	37.024	1.02761	2.88006	3.70006	4.77287	FFC1_08978	FFUJ_09413	uncharacterized protein FFUJ_09413	MADNNNQQPGLIGSHAQYVKGAAEATIGAITGSQPWKASGEQDKAAGLADMKKAGELRAQNDPNHEKGYGKVEEVAGRLTGCQGMEREGHDSAAHKQE	csbdlike domain-containing protein
XLOC_009704	5.64609	13.6964	43.3987	21.7992	1.44544	1.56013	2.86018	3.47537	3.26669	10.4324	22.1392	15.3801	0.502624	0.499168	2.01913	3.82568	FFC1_09009	FFUJ_09382	related to lactate 2-monooxygenase	MASPSADVLGYEKSIFDAGLHFARPAFTFQTSQWEPLAKETLSATSWGYIHGNCGSGSTYRNNLTAFSRWSILPNRLVPSHKDENGNEQFSDTSTTVLGQKLPFPLAIAPIGVQKIFNPEGEAATARAAASLGVPYTLSTASSTSIEDVAAANGKDAPRWFQLYWPSHEHDDITISMLKRAKASGYTALFVTLDTYVLGWRPSDLDNGYNPFIHPDHIGVEIGLTDPVFQMKFREKHGYDITDAASGVYQAAQGGSAGASLGDAAREWAKIVFPGHSHSWEDIEFLKKHWDGPIVLKGIQSVHDAKKCVEAGVQGIVVSNHGGRQQDGGASSLGMLPRIVDAVGDKLDIFFDSGIRCGADIMKAVALGAKCVLVGRPYAYGLALGGEDGVRHVLRALCG…	related to lactate 2-monooxygenase
XLOC_009709	0.747294	0.890102	4.31539	2.89951	1.18668	0.826675	0.664141	0.694614	0.0286315	0.267229	1.37785	0.22758	0.902734	0.368466	0.57525	0.489827	FFC1_09015	FFUJ_14904	related to serum paraoxonase/arylesterase family protein	MASKSSAVGPKALVVSALAIGLGVFLARPINRVTTVLGFFRTPSSTIVSDADFITIDDTTVCEDVHLHSGLLYTACEDSYAPRFSWFPGLGVLHDPLTASKSRGSIHVIDPKTFKSKRLEFEGFQGPFITHGIDVIADPKDKDGVYIFAVNHLPNPEYLQHIVDGKKQAFGGNKAASQIEIFHHRVGSSSVKYVRSISHPLIQTPNDIVALSPTSFYVTNDHHYREGLMRQVEDMYYGAKWSNTIYVEITDTASKDSTAGFSASVALTGLHNNNGLGHGKTPNEIAIGSAASGDIHISTVRPDHTIQVLETIPFDTAVDNPFYYSDPFASGDNDSSGYVSAGLSKACELANSIGIDTATEPVTVWLAQRKNGKWENKVLFEDDGKRLRSAATAVLIGID…	related to serum paraoxonase/arylesterase family protein
XLOC_009117	2.25816	2.13843	7.32254	3.71518	2.35731	1.91102	1.43099	0.962833	0.729703	0.501531	3.64335	0.673627	0.718624	0.140707	0.0673935	0.495368	FFC1_09034	FFUJ_09358	probable general amidase	MDENSWETRAAVKRAATLDKIPSEWRLSSEDLEHAHSQRDITGSFIERFLDEETASITSLKTVEILNAVSEQELTTMKVVRAFCQRAAVAHQINNCLHEIFFDQAFERAQYLDEYFTKHGKALGPLHGLPISLKDQFHVKGVDTTMGYVGWIGGNLGIDSDKTYTVESHIVTELLSLGAVLYCKTSLPQTLLFGETKNNIIGQTLNPINQNLSCGGSSGGEGALMALGGSSVGVGTDIGGSLRIPAGFCGIFSIKPTSNRLSYRDVANTNPGQDTYRSTIGFMGTSIDALEVVFKAILGTEPWMKDPAVIPIPFRKDVMESYRRRSDEKGNAKSGERPLKMGVFWCDGMVGLHPPVLRGLTVVVDALKKAGHKGGFLGADGAHDIHQHLNRSGEPLIPD…	probable general amidase
XLOC_009129	0.726515	1.13844	2.45261	2.51243	0.165493	0.114261	0.0875965	0.0981257	0.364876	0.620383	1.17101	0.314429	0.166144	0.192246	0.0902443	0.0569311	FFC1_09055	FFUJ_09338	uncharacterized protein FFUJ_09338	MKTWNKAILTMGFFSPLMYAKASWPMPNRGSFNIEDFKFDSGEIIDSLNISYQTIGELKVNPDGSNNAVVLLHGTTGSSAQFLVEEFAGALFNPGQPLDADEYFIVMRDAIGHGNSSKPSNTDLRASFPKYQYPDMIRADHLLMTEHFKLNRTRLTLGVSMGGMHTWMMGEEYPGFSDALMPISSSPVEIAGHNRLFRKFITELITIDPAWKGGDYEKQPAAGLGGALMIQLVLLSSPSYWQRAFPTREAVDKYVDEHIIPRLEDFDANDQLYAWNASQTYNPKASLKNIKVPLTAVNTADDLLNPIELGLLEDGVANDMTPGYGRAVTIPASNETTGHDSYIMADIWKDELEKLLARSSP	uncharacterized protein FFUJ_09338
XLOC_009130	5.71446	6.74261	42.4587	75.3682	1.26201	0.509896	1.94183	0.973765	3.63417	2.53636	39.3336	64.2679	1.11339	0.524203	1.92075	0.320973	FFC1_09056	FFUJ_09337	uncharacterized protein FFUJ_09337	MSDSKKGGDLFDMAKDGTSIPGDAGKQDTIKSVPNPHQRDGEAAGGLGSSDLAGAADNAVLSASEGREFGVGEGISATGHDIPQSVTGKPGGRGGTQGKEDVRRDTGAFANREN	uncharacterized protein FFUJ_09337
XLOC_009739	3.73353	8.17935	158.086	15.5451	0.131949	0.12413	1.61087	0.0841541	2.53531	5.06258	139.662	15.1455	0.0365085	0.0781796	2.54441	0.0740738	FFC1_09074	FFUJ_09320	related to Rds1 protein	MSATSFLRSAILLATVGVVSAVPVVSEAQTTVSSSGPAGTPRPYSFVTSHGPFKGTPTTTGALSTTVLASAIPERPPPPGSFDYPANGKLNAPQPAPYTPDGGVGTNGSAPVYRVQSDFDYQSLALALYQEWIELDLFRWGLATFSKEEFDAYGINDEDRFLIEHMARQEIGHATVISNMLGPEAPKQCTYNYPVSNVPEFIDFNQKLTRWGESGVYGFLPHLNSGPAAQLLLQSITIEARQQMIFRQFGGTFAMPEWHTPGIPQSWAWTLLAPYISSCPYNQTRLVWQNFPSLNILNQPNPARINGSAVWNETTGGYANTLSTKDIDDDELCVNATKTGENCKAAITHNRTIPLSYPGRQVFLNWDAPGKPVGPNNSYITSTNVKEPKFAAWVSQLNV…	related to Rds1 protein
XLOC_009140	0.0931182	0.335836	2.32993	0.187446	0.220267	0.739511	0.175603	0.125069	0.0451776	0.376186	0.754514	0.123203	0.269723	0.293487	0.0687416	0.133036	FFC1_09075	FFUJ_09319	related to HHE domain protein	MSSIRSIMSPQLRTVFRPQHFRSIQGPIRVQIATMSAVSNAIVKDHLNSTDHDHQQRFGNQFVWELARHSISEELVIYPAMEKYMGDKGRRLADEDREEHHQVKERLKVFQNLKSTDPGYVPEIKHIWGLLDKHIEDEENRDLPALEKALAAHAEDADSLAASFERTKHFVPTRSHPSAGESPPFETVMGLLAAPIDRLADMFRKFPDKRDV	related to HHE domain protein
XLOC_009744	0.227174	0.143793	1.84268	0.347379	0	0	0	0	0.222937	0.0846812	1.12515	0.136136	0	0	0.05821	0.0397508	FFC1_09084	FFUJ_09310	related to NmrA-like family protein	MTQDKKTVVVIGATGLQGGSVIRTLAKSQDRYHIRGLTRNVSSPKAEALEGLGIQVHQADVDDPESLRRAFEGANAIFAMTDFWQHMSATKEEEQGKRIMDIAADLPDLEQIIWASLPDAKSISDGKYPHVYHWQSKAAVTDYIRTEKPALWKKTTAVLFPNYFENSLTQPRTYLPIKQDDGTYLRSFVLPETTPLPNVAISDTGKLVQYILDHPDECLEKEIAFYSEAISEGEKIKSMASAYGIDIHYNELSSEEFQSILKSKMDDMCALDFTEQLLIFRDFGMIYARPEFVQANKLPGLDLMKWDDFMAANNLAEYMTSN	related to NmrA-like family protein
XLOC_009898	0.508879	1.01615	1.9245	2.77116	0	0.11179	0	0	0.396149	0.453875	1.40567	0.216857	0	0.282134	0	0	FFC1_09391	FFUJ_03920	uncharacterized protein FFUJ_03920	MFKKARRLGSQLAGWKYLIRAQQYTYHPMLVKLKFEREALAKALHRNEAMSTMDKGDQAATDQLTKWKTRLEQDENWPYLVGRKSSRTIYFLQIIVVALRNRFDLELQLEYNGQLGPIDRHFVIKTAFEAKPSQVMLATRATGGQGLNLQCFNGAVQREPWYETCRHVLKGPELLQS	uncharacterized protein FFE2_02514
XLOC_009919	0.0324419	0.614751	3.92841	2.48632	0	0	0	0	0.0578445	0.413266	0.911354	1.01245	0	0	0	0	FFC1_09442	FFUJ_03970	uncharacterized protein FFUJ_03970	MKSVIALALLSVAFAAPQGGSNNAALEKRQFSPAELDAFFDSLSSLLGQLPTVPVTDILTFSTSVSGTPTEVPITTTAAFDDGTLPFAKRQSPADLEAIISSLSALISTTATPTEAIGCATDVVDVPTTVNGVPTEVSSVAAVPTAVAPTAAPAGAPAAPAAPGGA	uncharacterized protein FFUJ_03970
XLOC_009952	10.1118	11.2934	30.9705	21.6616	0.547221	0.636104	0.743779	0.521098	5.15028	3.91964	6.76201	14.9841	0.139891	0.27715	0.458966	0.302334	FFC1_09504	FFUJ_04028	related to integral membrane protein PTH11	MAAATPSPEYLAETRGPMIRTVTWLSVIFPILFVGLRVYTRLFVRKVFGLDDWVIVLSLILLICYGAIIEAAVQKGLGRHIEWVLTFAPQDAVPVALLGQVSQPFVVMSCALGKTSFSISLMRLAAQRFIHRFLWFIVVTMLTLHILISIIVFVHCEDPRTTWNPAIVSKCWHPNAYLGVLYFIGAYSAATDFILALLPWAMLWNLNMKNKEKFGVAVAMSLGVFAGAIAVIKCTKLKANATSTDPTYDVGELLLTACAENALIIMAACIPTLRPMLRKVFPSSAKSSENSHRLKNMNNIMFVPKNKAGQWSALIETEAHPDHNSDNQSDKSILKEHRGTMNGQSNAGPAGGPASPALSPHIRKTMSVNVSYDRSNSM	related to integral membrane protein PTH11
XLOC_009963	1.20064	1.49665	6.59609	1.88942	1.31027	1.76142	1.82309	3.85714	0.0803117	0.486021	1.24608	0.257441	0.623418	0.43039	0.494971	1.04053	FFC1_09537	FFUJ_04061	related to 2-polyprenyl-6-methoxyphenol hydroxylase and related FAD-dependent oxidoreductases	MAPLKVLICGGGCAGPALAFWLARLGHQVTIVERFPALRATGAQIDFREQGIATLKVMGIIDEIRAKLVDEAGVAFVDTNGKILGTVLANTSGKGAQSITSEFEIMRGDVVRILYDATKDDVKYIFNTTVEKYEQDEKSVLAHFSDGTSDSFDILVGADGQGSRIRKAIGQADSPDPYRKLGIHMAYYFIPREEGDSNIRRTYQASQGRMIFRRTHNSTETQVYLILKDNFPEVSSIHRGSVEQQKEFWTQRFRGAGWQTDRFLEGMKITENFYSQEVVQVQTDTWHKGRVVLLGDAAHCPSPFSGMGTTLGFIGAYVLAGEIQKNPENLSLAFENYDKVLRPFVDEVQNIKIGLIRRAIPDTQLGVTIIQWIAWFVCLLRIPYLISRFSSEEKAGWPL…	related to 2-polyprenyl-6-methoxyphenol hydroxylase and related FAD-dependent oxidoreductases
XLOC_010706	100.647	408.444	1116.37	344.164	29.81	37.162	41.3914	36.8481	26.3155	94.3258	459.596	86.1848	7.16155	10.0846	13.8534	7.14068	FFC1_10001	FFUJ_04508	probable blue-light-inducible Bli-3 protein	MSFSNANTGDAPADPYKKANAEEVPLQTKIEDLVHFITKEKFGMMTTRGSGSGNLVSRCMALAATETGGIDLLFHTNTESGKTDDLDADPHVNVSFINASGEWASIAGNASISTDRSLVSKHYSPTLKAWLGDLGDGVHDGSENDPRIGIIRVKTVSVTYSLVSKNLLSRAADIASSAVTGEPASPNTLREISEGDVRSWRASRE	protein bli-3
XLOC_010274	18.9783	25.9965	52.6792	58.5348	8.28803	7.26798	5.96191	9.7045	11.3752	17.6387	37.6886	39.1164	1.24188	0.250423	0.638846	4.26238	FFC1_10111	FFUJ_04618	related to aldehyde dehydrogenase	MTFSSEIHTFHSGRSQPESSSKTNTFVSVDPSNAKPLATIYTTTPEQLNSTIAAAQAAFPTWSQTPAPRRAAILLKAAAILRERNDELALTETLDTGKPWSETSTVDVATGADVLEYYAHIAAGSFPGQNTRLRPDAFVLTTHEPLGVCAGIGAWNYPIQIALWKSAPCLAAGNCMVYKPSEVTPLHAQTLAQIYIEAGVPPGVFNVVYGDGIAVGAPLVAHNDIAKVSFTGQVSTGSKVASQAVKDMKGVTMELGGKSPLVILPDADIEEAADTAMVANFFSTGQVCTNGTRVFVPDILLSQVEQAIVQRCREGIRMGLPQNGETNFGPMVSAAQQEKVKMYIQHGRTVDKAKVLFDGSAEPSMTQPTSDGFWVHPVVFTNCTDSMRVVREEIFGPVM…	related to aldehyde dehydrogenase
XLOC_011417	0.501302	0.344039	2.10532	1.3523	0.444753	0.492513	0.434423	0.390931	0.199266	0.0262286	0.699428	0.370059	0.231851	0.262653	0.264725	0.196439	FFC1_10267	FFUJ_11045	related to phospholipase A2, cytosolic	MVILTSIRKSPSYLYAKTYCLCSLVSLVQATPVSSRVRVSHTRTRFRNGQVVVSLPTIDGKGHTDCYRPPSKVSLSQKSRGIVERWYQRAVDLASVKSLLQRDETDFATYPELQWDAQVRHGSSLHHEEQKFIELRKIRISSQGEDALHRFLDLPSDEKIDPRNVPLIALGGSGGGYKVMYGFSGFILAAKKHGLWDCITWTAGVSGSCWTLAAYYTIARHDIQRLIDHYLTVASELAHPMSIHALNMVARSKRGVYFLIGPLVSKAQKSIIGLGIMDLYSTLTATYQLLSREPKGRLSRATFQWSKIWQRSGTDKGLEPMPLLAAVRRVPKYSYECKTISAKARDAKKQPTSRQLDTVEGTDQPNVTASVNRRPKKRFQYFEISPLEIGSPDLNRYVP…	related to phospholipase A2, cytosolic
XLOC_010848	51.4341	97.324	175.508	85.2312	0.406739	0.978981	2.20601	1.03726	25.1391	41.8936	125.738	37.815	0.247114	0.817141	1.43553	0.463036	FFC1_10269	FFUJ_11043	uncharacterized protein FFUJ_11043	MSKLVDDVKSGLKGIRGAGDALRGEVLDATDQAFDTNPQHPETVKDRVDNRAIAEKGKQDMHGADNMIARREWEHKGVEPPAHVGRRENEKPLVAQTEPPSRTAAHDRPNEGLSREPEMGHFGSRGTEGGVVKDPDAYLPRYA	uncharacterized protein FFC1_10269
XLOC_011419	6.37387	6.35942	32.1326	12.8412	4.66979	6.98593	6.07287	5.0566	2.24062	2.47316	14.5014	4.38571	0.0870873	0.935365	2.12506	0.485568	FFC1_10270	FFUJ_11042	related to oxidoreductase	MSQNGLAFNCAVITGGGGGIGRALAEYLISKGKKVLLAGRTESNLKSTTQEIGAAGEHPELDCLINNAGVQRPIDVLKNDDFLEKADQEIDINIRGPMHLSFALIPHFKTKPNALIVNITSGLAYIPFSVINPVYNGTKAWLHFFSMNLRTQLKNTKIRVVEIAPPMVESNLHRERENPDDNKKEHAPHTLTMEEFMGEIVPKFEKGDDTIGAGMAAKAIDTWYGAFGGLYEGAAKSYI	related to oxidoreductase
XLOC_010939	1.95425	3.35873	31.9551	10.5209	0	0.0294445	0.23318	0.118537	0.886931	1.4738	11.1806	1.62657	0	0	0.403882	0.0368203	FFC1_10450	FFUJ_10896	related to 2,5-diketo-D-gluconic acid reductase	MERSQSDTLPLANSVQIPQLGFGVYLSPPDVCTKSCLTALEAGYRHIDTAQYYANETEVGQAVQKSNVDRKDVFLTTKILEAAGSVDTSYAKCIESIEKLDPESGYVDLFLIHSPNSGAAKRKEMWQALERLYEEGKANSIGVSNFGIKHIEELKQFAKVWPPHLHPWAQQRDAVKYCEKNNIVVEAYAPLVRNQKADDKTLKSIASKHNVSPSQVLIRYCLQKNWVPLPKSDTPERIKANADVFGFDLDDKDMKALDDLDEGAEGAIVQAVDNY	related to 2,5-diketo-D-gluconic acid reductase
XLOC_010940	0	0.151011	8.02006	1.31819	0	0	0.0544217	0	0.0347908	0.15029	3.05926	0.483345	0	0	0.0942615	0	FFC1_10451	FFUJ_10895	related to galactinol synthase	MADKSARHNAYATLITRDSYLPGIIILAYTLQRNASIYPLVVLYTPNLPKDAKRVLELEAPKCNMILRECEHLLPPEGVKMTLIAERFADTWTKLRVFELFEYDAVCYLDADMAVLDNMDVVFRVETHLPDDWIAANHVCVCNLDSDSWAPEDWRAENCAYTPLQHPTALEEPLQPTETSPSPHKLLNGGMFIFHPSKGLWDRMLHVFNTTPLLSSFMFPDQDFLAFFFENKWYALGWQYNAIKTMRYWHPNIWRDEEVICLHYIVDKPWAKRVGLDGVAGYKGLDGVTHCWWWQLYQYWEDERTSDGRGGNEAIALLKKLIAPADTMEGGLGYLQVGLPVRA	related to galactinol synthase
XLOC_011615	2.04594	3.79025	17.3667	5.98835	1.25981	1.86918	2.59872	0.469597	0.865557	1.77562	2.45003	0.830192	0.669535	1.48299	1.99016	0.323152	FFC1_10608	FFUJ_10747	probable iron-dependent peroxidase	MNPQAVESPLSQSATFLVLSATDNPDASKTIRSTLSSIADITKNISIRHQSANLSCTVGIGSSAWDRLTKLPRPNELHPFKEFKGSKHTAVSTPGDIFFHIRSERRDMAFEFERQLMDRLGDAVKLEDETVGFRYFDTRDVLGFVDGTANPVGPDVKDSVLITAQDDSTAVGGSYVVVQKYLHDLKAWKTLKTEQQEAIIGRTKLDNIELDDADEGQQQSHKSLATIEDEGGSEHDILRDNMPFGSPAQGEFGTYFIGYSKKLWVIEKMLERMFVGVPPGMHDRILNYSKAVTGSTFFVPSADFLAGLDDD	iron-dependent peroxidase
XLOC_011032	1.14368	1.0436	5.08472	1.32052	0.515284	0.537005	0.230177	0.877565	0.63665	0.48586	4.28676	1.50844	0.522575	0.264076	0.348216	0.365009	FFC1_10652	FFUJ_10705	uncharacterized protein FFUJ_10705	MTIARQTLSSFRRIPTVTSALRSRTVLNLYTIRMNSGKVKTPVSSDPNHDKNNPPVADHSDGAMASLKGAPGKRDAGSFENQNMTQKEKNTNSQNAQEQDSREGSTGEAGHFEKSGRKPKM	uncharacterized protein FFUJ_10705
XLOC_011062	31.4764	41.9751	99.381	38.4867	46.613	100.613	73.1354	59.8633	10.8924	12.7306	27.1887	7.88461	48.9636	144.215	106.145	90.2878	FFC1_10717	FFUJ_10645	related to reductases	MSRYSAAHEDPQGPGDARPTALQIIKDEGVEGKLKGKVIVITGTSSGIGIETARALAETGARLFLTARNLDKAKKACEAFFDASRMEFIDLDLTSFDSVRAAAKTILDKTDKINILVENAGCMAVPELELTKDGHEMQFGVNYLAHFLFFELLKPALLAAVTPELNSRVVVLSSSAHQHGGINESDNYSFQKGGYDPWLSYGQSKTADIYLANEIDRRYGSQGLHATSVHPGGILTELARHIPPEVLQSLASSDTARKMLKNPEQGAATTVWAAIGKQWENTGGKYLENCQEAPPAKQIDPHFGKGYAPHVYDPEREARLWEDALKIVGLA	related to reductases
XLOC_011155	0.0283268	0.193279	1.4726	0.179003	0.0456712	0	0.165673	0	0	0.182615	1.07782	0.314529	0	0	0.286955	0	FFC1_10861	FFUJ_10505	uncharacterized protein FFUJ_10505	MTVTTVPATHPIERRGPLSQTSTAELHQSRDLQHQRREAHIPKGSNDEEKLYVLTLFTDKRHHDEMTALRRQWFPSRLLKVDAHITLFHALPGSKLSEVKADIADIAARAAKFPIGVGNQDVYEMGKGVGIKLYAGQKRAMSIRSELRSKWEHFLSEQDRREKWRGHYTVMNKQDDKEEVQKCLDYLKEGHAESKGTVEGLCLWLYDRGWWREEEAFKFSDKAKK	uncharacterized protein Y057_6285
XLOC_011159	0.16666	0.291005	1.4011	1.15387	0	0	0	0	0.127156	0.289892	0.61772	0.335163	0	0	0	0	FFC1_10865	FFUJ_10501	related to triacylglycerol lipase V precursor	MHRNPFILAALPVLARALPASTYEGELLTVNTSSGIFAPFPEPSYPNVAAFLDIPFAETPVGDLRFSPPVAKSYPGDRAIRATKLPRGCIQYVPLLLRGTVADSLVSAANFQRGDYANTTEDCLRLSLFTPKKSITENKDAKDERLPVVIWVHGGGYMIGGTNVPYQLAQPWVQRSQKHIVVQIQYRLNIFGLPNAAGLAKEGKNLNLALLDQRLAVEWVRANIARFGGDPNRITLWGESAGAYATDGYLFAWARDPIVKGVIADSGNALAIEGSLGNARNHSTFSIAARHMGCGDLSPEKELQCMRGVPEHKLKEYLQAELGQGGAADDGLSFSLLPDNTTAFTNYTERITTGSSKFPANIPLLIGTNTNEGAAVIPYNFPGYKTATEIPANLKPIAN…	related to triacylglycerol lipase V precursor
XLOC_011747	0.338011	0.607764	2.15824	1.08331	0	0	0	0	0.10366	0.090758	1.70971	0.722084	0	0	0	0	FFC1_10867	FFUJ_10499	uncharacterized protein FFUJ_10499	MPLDMEPTKLGTSRKLSHTKLSRFALHADKEGLGVLDDILLCLNPVFSLKDVLPKDAVLKLDLPGLGGQNIWAKDASVYLAFLKFITKESKCNFDDYLSLAAVFHTLDCIYLMAPNGEHMAYGKALSREDERVAESHFNDHRAGSKPLIRQSSGDLQKLIEHLSLFFPGTIKKLLVFRRKGLTQN	uncharacterized protein FFE2_09483
XLOC_011749	0.865578	1.54539	8.36491	9.32926	0	0	0	0	0.599988	0.811537	0.303184	8.81134	0	0	0	0	FFC1_10869	#N/A	#N/A	#N/A	serine threonine- phosphatase 6 regulatory ankyrin repeat subunit a
XLOC_011179	0.324747	0.538748	2.46435	0.528037	0.0689574	0	0.0217182	0	0.0894701	0.28324	0.172419	0.190637	0.0676165	0	0.0376171	0	FFC1_10903	FFUJ_10466	related to Auxin Efflux Carrier superfamily	MSSSVVSTFVGAIQASASVLLTIFYGVVAGQTKLLSVETGRQISKICIKMFLPALLVVNLGTQIEASNALQYILILGWALVYNLVSIGIGYALTKVLSLPKWFTPAITFNNTTSYPLLLIQSLGSAGVLSTLAKSDDDTSDAIIDRAKSFFLVCSVISNMLTFGLGGTLLGVSDEDPVDAMDADLRDRAGHNDTPGESGSDEENGESNERTSLLPGPLPRYAKKASRGTAQAQHAVWDKLHPRIQHALALTTQFISPPSVGATIGVILAFTPPLKKAFFADSEDGGIFNAWLTVSLKNIGELFVTLQVIVVGIKLAHSLRRMRQGHDSGSIHWLPLSIVVLIRFFIWPVLSILFIRMLVTQTDVLGQDRVLWFTMMLMPAGPPAMKLVAMAEVDDADED…	related to Auxin Efflux Carrier superfamily
XLOC_011188	6.20501	10.8368	30.2775	20.4522	0.0846192	0.346356	0.271184	0.0321705	3.25677	7.13087	22.982	12.5488	0.144478	0.267981	0.27555	0.0557212	FFC1_10916	FFUJ_10453	uncharacterized protein FFUJ_10453	MAPSGLAIIIGAGPTSGRGIARVLARNDGGNLAVALLARNPNNLNSLRDSLRKETNGVLHSFPTDTQPENLRKAFKDIANHPDFKDLKLKLAIYHVKHASKKPFLEETPEGFNESMQVYTTGAVVFAQEALKLMYEQNGGQTLLADTNGAKKGTIIFTGTLGAMRTNTGYAAYGATRASARMVAQAIAKEHSRFGVQCVHAIANGRITDEDTEETRTGKHMRAEDVGQTYLWLSQQPSSLWVHELDLRPAQESF	uncharacterized protein FFC1_10916
XLOC_011225	0.259609	0.466097	0.911689	0.535153	0.0371167	0.139957	0.172764	0.0247446	0.0690949	0.20889	0.328046	0.0831384	0.0320043	0.0584372	0.125778	0.0278675	FFC1_10981	FFUJ_10397	uncharacterized protein FFUJ_10397	MAELALAIIPLGITVTSGLTKYLKAFNDHDDDRARLVRQAERFESTFQSLDAALKRSELDPGLSSSASEAHASLKECHKALKELEALQHKVFATTTSVASTAPRARKKDKIKGGCKKLMYPLQKPDIEVLEGALSRLSTTLNLALGILHLDGESLTRKTLNEQMVEIQKNTVITSITSTSIEELRQPISKIDLALPVLQTSVDSVIPHVNQRFDQISYQIAYQQAQMQAQIKTLLDAAELTRYQGRPETSQPRLQDHSEGQGNHLLTGENDWKLTALAKRDLVSMCSCPSRRMRQDKTFALGSIHFAEEMLSDHCHEKDCVFFLMPSGYEKARTVRFTGFASLFKRGLEVSFITRARAGGFSISPSFTYFPVVDEKVAPGFLVMSLLHRASRLENMNET…	uncharacterized protein Y057_15039
XLOC_011274	0.604292	0.441148	4.49349	1.21958	0	0	0.30107	0.0239868	0.401912	0.397145	3.44442	0.832932	0	0	0.52147	0.0415465	FFC1_11060	FFUJ_10321	probable alcohol dehydrogenase homolog Bli-4	MSSIVDSVKNTIAENFGGPAEKLATRQFSLAETPDLINKVAVVTGGSEGIGYGVTHTLLSHNISKLFILSISEDVVNGAKKSVAEELGQEKADRTEWIQCDLSDWAEVKKAAEQIKKSTDRLDILVNNAGRGIMTYQLSKYGVDQHMAVNHFGHVLLTSYLLELLKKTADEHGTVRIVNLASNAHQGAPSDVKFESLDELNQDLGPNPQYGRSKLAAILYSRYLDRHVTKAGNPKILVNATHPGFVSTRQSVEHIHEAYPLAGYAMSIGMEPFKKDQFQGATSSVFAATITDKSGQYICPPAVPESGNELSQNEQLGEQLMELTREVISDKFESFDDRRFY	probable alcohol dehydrogenase homolog Bli-4
XLOC_011278	0.306103	0.397942	1.03157	0.715506	0.270676	0.153392	0.235271	0.175686	0.239563	0.18223	0.15045	0.301889	0.0302286	0.140357	0.127448	0.190611	FFC1_11065	FFUJ_10316	uncharacterized protein FFUJ_10316	MVGVPGRSKACVTCRRRRKGCDKKVPFCGQCLTLGIPCEGYERQQIWLITEGSTQKSYTKSPSRSPSSSPSSTSGSVVILHDSLTRTARAQKFTGLFWSDYLSGGSGYSLKASGITSTKWMKLYEALSEVEASLQYVAMALSTATLGATNNDIQLMNKSQQAYGLAMQQMATSFISPSRNKDGILASIQLMRVYEQLFGTGISAAQKNSPVSQIKGFRKHIDGETALILSRGPEDSWSAMGKQLLADGRLTLINAYISRRKRSPYNNGWKQSQLWRSVTNSPLNQLIDILVEVPALLEDLDIFRETLNIELYNSILTRCHSCEVEILALGLGFGESLTTYDYTYTREPLPIPKNDDDLAVVYLSCYYWMTCMFIYSTLGFCELESMDIYARSPILSYPS…	uncharacterized protein Y057_7535
XLOC_011328	3.90225	6.52802	13.2105	17.1838	0.349583	0.348334	0.255378	0.315908	1.24445	1.71951	5.15369	7.48121	0.260869	0.186138	0.0742885	0.152971	FFC1_11165	FFUJ_10217	uncharacterized protein FFUJ_10217	MKFSLILAPLVLLSDVVSAQSSLTDICTGSANNGCKTTITVPNGFKIVKSSKNVRSIQFNYIKVNICDQLRKALGTTLGNKFLKARDPICNCFTKLRTLNSEGKFTSSSAGNFDLANNYYLDQAGTLEKCLTDGGLKYSQSRDATLNKLKATGWQVVLGADMARGTFRAMISVIHPCRVTGVCNSEQIYAVFSNYLTASYKLLLGPIIPILNRWRDNLDLITKSTGYVMTATDNVKEAFNEVEYILSGYYDSICTEMDYCGSNRPNIRRFMTDVQIVINLSDKLSTGRQIFSFNTKTKSLLDDVNKLRSNWAYIPPANEMISKIRNNEIKVTKDVFKFMLVVGGMSTTSKKVATELGPLKSFVAEYLADSKALHELITRMLAIDWEKVNQGEFDNTDQT…	uncharacterized protein FFUJ_10217
XLOC_012085	17.6791	39.1458	155.702	153.172	1.48021	1.69902	4.23693	1.42735	11.6877	22.7988	156.497	136.841	0.406281	1.65054	4.96097	0.979398	FFC1_11512	FFUJ_13751	uncharacterized protein FFUJ_13751	MSTKNPSHGQKVSIGKPRVIPELTDQVDLGQNAPVKEEGAGTVPNESLAAESLKEGGEFASNEGIHGENQPTSGSENTSAGRNTETSSAPSFGSDSKAKAKSSSSASKSSGTASQSSDSAPKSLAGTAPSYVDNQYIKESGPHGKNLKEGIDYSNTKDGLKKALESEPGSQDDPSRLAEQQFQQNQTAAGRDAGPKQSELEGKTPFDALKNEASS	uncharacterized protein FFUJ_13751
XLOC_012723	6.72917	11.2176	25.9624	9.3442	4.25325	4.73524	5.17878	16.5395	1.89412	4.48841	2.55434	3.02363	1.64516	1.09169	2.16144	17.6643	FFC1_11844	FFUJ_12411	related to CCC1 protein (involved in calcium homeostasis)	MTHITSESTPLLPEPATERSISYQSSHPAYDARPLHPNYSKHEECHVDYSDILRDIIIGFSDGLTVPFALTAGLSSLGSAKVVIIAGLAELFSGMISMGLGAYLAAVTERDAYHSQAGKKEFAVQNRPGDERTGVYDVLEKYSVSRTAAAPLVDELCKNPTEWVRFMMDFELKLEEPNVHRAWISAVTMGLSYFIGGLIPMIPYFVMSRVREALFVSIGITVAVLLVFGYVKNYVAIRNHRAGVWGAVQTLIIGMLAAGTSYAIVRGLDSNDS	related to CCC1 protein (involved in calcium homeostasis)
XLOC_012273	0.50037	1.29115	79.3723	13.8038	0.116861	0	1.24055	0	0.351843	1.05322	54.0309	10.389	0.20241	0	2.14871	0	FFC1_11867	FFUJ_12435	uncharacterized protein FFUJ_12435	MSDYKPTEHDGLRKDGQPDGRVGTGEFAHGKVDPHKAGEQGGKTSGSGEGLGSSDSSGGDYKPTEHGGLKKDGSPDQRVKGN	hypothetical protein FOXB_05815
XLOC_013457	35.6313	53.2058	123.188	70.0727	6.57838	10.5937	14.0671	14.2345	6.90813	9.95532	62.1571	22.0698	4.78701	5.26554	3.36444	11.6189	FFC1_12309	FFUJ_11846	related to thioredoxin	MMSAKKVSQYVINNLTSQLRVSDISNLYYSSITPPNPEKMVHNIRTKDEFQDALKKYPIVVVDFYSTQSAESKHIAATFAHAYELDKFRDFRFVKVDIDDLKGLAEELGVSQPATFHMYKNGEKINDLQSEHKEDLIQFLETGL	related to thioredoxin
XLOC_013481	9.43948	9.79519	48.2238	42.9167	1.39723	2.19774	12.7572	34.7415	6.73116	6.89779	30.4848	22.5279	0.465333	0.901503	17.7858	41.1402	FFC1_12341	FFUJ_11815	related to Glutathione S-transferase II	MTSLKPLILHAHTTGPNPFKVAILLEALNIPYTVKLWQFGDAPNGVKGESFLKINPNGRVPALEDPNTNVTSWESLACMNYILRVYDSENKFGARQEAGEQGRADVDAWTSFLVSTLGPFLGQCNWFRHYNNVKNENAYERYQAQVYRCFGVLEEQLKKHDGEWILAGDKPNVVDFHFEPWMRQYEYAGLSLDDYPKVKGWLDRVQALPEVKKAYEKIKAGEEV	related to Glutathione S-transferase II
XLOC_013489	0.985976	10.4339	254.851	275.64	0.226503	0.392225	4.18933	0.951414	0.498019	5.41361	159.968	186.971	0.20156	0.332327	6.63997	1.40034	FFC1_12352	FFUJ_11804	related to HSP30 heat shock protein Yro1p	MADHLYARKNDALNVNPDIVNGQRSDINITVRGSDWYWAVCAVMTVSTFAFLGLGMRKPRTDRIFHYITAGITMIASIAYFTMASNLGWTPIAVEFQRSNHRVAGIYREIFYARYIDWFLTTPLLLTDLLLTAGMPWPTVLWVILVDWVMIVTGLVGALVKSSYKWGYFAFGCAALAYIVYVLAWEARLHAKHVGPDVGRTFVMCGSLTAVVWILYPIAWGVCEGGNLIAPDSEAVFYGILDLIAKPVFGALLLWGHRNIDPARLGLRIRDIDERIFPDGPNNKVASGHGARNDTATASGSNVNPNA	related to HSP30 heat shock protein Yro1p
XLOC_013490	6.28303	60.6199	388.996	172.023	1.33379	2.14563	6.03998	11.3166	4.52939	17.987	95.496	25.0934	0.679792	1.47092	7.45928	3.5021	FFC1_12353	FFUJ_11803	probable phytoene dehydrogenase AL-1 (carotenoid biosynthesis protein al-1)	MSDIKKSVIVIGAGVGGVSTAARLAKAGFKVTILEKNDFTGGRCSLIHNDGHRFDQGPSLLLLPRFFHEIFQDLGTSLTAEGVELLKCEPNYNIWFGDGSSFEMSTDLTKMKKAIEAVEGIDGFERYLGFLQESHRHYEVSVESVLRRNFPSILSLARPEVLFNLFNIHPLESIWTRASKYFWTERLRRVFTFGSMYMGMSPFDAPGTYSLLQYTELAEGILYPRGGFHKVVEALVNVGQRLGVEYRLSTGVKSISIDQATGKANGVVLSDGTHLPSDIVISNADLVYTYNNLLPKTSYADSLSKRETSCSSISFYWSASKIVPELNAHNIFLADEYQESFDSIFKEHLIPSEPSFYVNVPSRIDPSAAPEGKDSIVVLVPVGHLLSDSEGTHRGLSKS…	probable phytoene dehydrogenase AL-1 (carotenoid biosynthesis protein al-1)
XLOC_013491	2.02992	22.6023	142.99	70.2313	0.645729	0.855353	3.15871	6.859	1.47196	4.09574	39.1073	21.8267	0.291643	0.582131	3.84764	1.76505	FFC1_12354	FFUJ_11802	probable geranylgeranyl-diphosphate geranylgeranyltransferase (AL-2)	MGWEYAQVHLKYTIPFGVVLAAVYRPLMSRLDVFKLVFLITVAVVSTIPWDSYLIKNRIWTYPPGVVVGLTAWDIPAEELFFFVIQTFNTSLLYMILSKPTFHPIYLSKKTGWGKIAGQILFASAIIFGLVSVSSGGEGMYMGLILIWACPFLLFLWSISYQFIVNLPWTNTALPIALPTLYLWVVDTFALRRGTWSITSGTKYGVVLWDGLEIEEAVFFLLTNTLIVFGLIACDNNLAILDTFPEHFPRTKGVPSLLTIIRTLILPKEKYDEERIQGLVSAVALLRKKSRSFYLASGTFEGRLRIDLIRLYAFCRAADDLVDEAPSVDDSRASIEKLRKFLDLAYEENQEEPSQRLREYVTSSIPEMFHMALLQLPTYYLPKQPLDDLLKGFDTDLLF…	probable geranylgeranyl-diphosphate geranylgeranyltransferase (AL-2)
XLOC_012990	0.0810159	4.0244	28.4017	13.0932	0.0154791	0.0257461	0.228306	0.0580272	0.0109478	1.59229	14.9805	6.15303	0.0264289	0.0240329	0.382665	0.0740711	FFC1_12355	FFUJ_11801	related to lignostilbene alphabeta-dioxygenase I	MKFLQQNSFTQTSMSQPHEDVSPPLRHPYLTGNFAPIHKTTNLTPCTYSGCIPPELTGGQYVRNGGNPVSHQDLGKDAHWFDGDGMLSGVAFRKASIDGKTIPEFVNQYILTDLYLSRKTTSIASPIMPSITTLVNPLSTMFQIMFATFRTIFLVILSNLPGSQQAIKRISVANTAVLYHDGRALATCESGPPMRIQLPSLDTVGWFDGVEAEGEPEISQAGSDDSPFGGSGIFSFMKEWTTGHPKVDPVTGEMLLYHNTFMPPYVHCSVLPKSNEKAPGHRLVNQPVLGVSGARMMHDFGASRSHTIIMDLPLSLDPLNTMKGKEVVAYDPTKPSRFGVFPRHLPSSVRWFHTAPCCIFHTANTWDSQSSEGELSVNLLACRMTSSTLVYTAGNIRPP…	related to lignostilbene alphabeta-dioxygenase I
XLOC_013032	2.79627	5.25479	11.4557	10.3391	1.17693	1.96289	2.73173	3.00461	0.854248	0.192436	0.906879	4.68392	0.543475	0.607247	2.17481	1.55574	FFC1_12441	FFUJ_11716	uncharacterized protein FFUJ_11716	MPDDSRTSSLEAIAQPEALLRSACTECHRRKQKCNRQWPCNNCQRRKVADQCRFKDDFKADSGDDAWSASVEVKRKRDLAGQDDDSDSDVGDVLEAIGYSRLHLLTKLDHDSGSTKPSEQYRLDPKNSAQLQRALDVLPPRHVVDCLVQSFLDVVNFYYYIVYPPYFSKEYAHWWDDYTKGRTCGVQWTCLLLMVCACSVQHVDGQLRARIESDVGESVKELTQKYHDAARELHSAIPVGHGHVYTVQYLLHSCYWFKAEARFAECWQVLGAVVREAQMINLHKKPEGQLPGFELEMKRRLWCIVDSWDWLVSSLLARPMLIDRAECDVGLPSLTLEDYPASPMLHLKLQSELVSLIFKRFGPPKILSEPDEIRDYQAILEGFMKTFPPEYALDHPNTP…	Putative transcriptional regulatory protein C3C7.04
XLOC_013538	0.656329	0.949563	4.447	2.82581	0.197178	0.163565	0.18112	0.195805	0.309929	0.447556	0.551947	0.828197	0.0744718	0.0413895	0.130924	0.0542753	FFC1_12444	FFUJ_11713	related to nonphototropic hypocotyl protein 1	MPTQHLNLVDDEMDSQPPPIPLRAQTPRRQVAMKQSFETQDLGDGMANFDPELLQAPSSRASSRAMSYRTQESQIWSHKDRDASSISSVYVPTHLPALQAKGAGLDRDGLEPLTEEEYDPASFDLVVPAHAMGKQYTLETQSELLFSVKHLSVIFDDPVLLQRFTNFLSASRPSSVPLLTYYLDTLKAMKAINYANSLTGSLKTIDGHDFTADPVTATVNEALAKRATEAFQAMVNHDLPAYITHTYIQTVSITIKRRITDTLAPQLRDLSEGLAEVFCLTDPSRSDNPIVFASEEFHRTTQYGMDYVLGRNCRFLQGPKTNPFSVKRIREKLAAGQDHCETFLNYRRDGSPFMNLLMVSPLYDSRGVVRYHLGAQVDVSGLVKECAGLDSLETLMADE…	related to nonphototropic hypocotyl protein 1
XLOC_013043	0.502878	2.19515	5.04837	5.29157	0.231876	0.55792	0.394066	0.227193	0.175775	1.00817	3.47934	2.92551	0.0824413	0.323409	0.217211	0.123148	FFC1_12463	FFUJ_11698	uncharacterized protein FFUJ_11698	MAFSGPSRAAAWTLSLPSSSQPVDHVILPDDGSKGSSESIMGEDLRQLVDSRDIQEGGKYRSIVKIQSRFQDRGRQTWMMGTGWLIRPDLLVTAGHVIYDWGRRLGPADQIKCYIGYNGKESVRSPQVQARYGAKVVTPAGWIEASSNRQQDVAFIQLDRPFTGNLRLFSYLNTPQTGNGIYLGIVGYPGDRMLQDEQGAQMYEEFARSDYNIGESPHHMVEYSISTFAGQAGAPLLRNSDGRLTVIGTHSYGGGGFDSNSGTTIGNAQGNNYNDLIGLFDKRTNFGEVGKVQVVQAQTQDRATSINEPHGLNRGRPGIAVETPRFDEESFFDTLKSVANVGRNGFTFPSTFLGPIGGPLSAVVGTLLGSLTESTLSQSTEIIANGPAERAVLAEAALQ…	Glutamyl endopeptidase
XLOC_013083	4.62603	5.66051	18.605	8.83877	0.939871	1.22814	1.27033	0.962259	2.82605	2.93589	5.3162	2.59298	0.673998	0.265109	1.09431	0.655715	FFC1_12548	FFUJ_11615	uncharacterized protein FFUJ_11615	MSGYAQNERGQGMSHATAPSKLSEGVQRQMPKSLEHALPESIHPTESTPGSSGGISYAKGGEASLLPQKVQESLPEGVKRAIPNAIHDTGDKVDSNDRH	uncharacterized protein FFUJ_11615
XLOC_013151	57.9095	85.3803	223.59	116.897	2.51615	4.5449	9.03307	12.1577	21.3238	24.8439	98.6105	52.0003	0.316107	0.795641	8.44322	4.69428	FFC1_12669	FFUJ_11505	uncharacterized protein FFUJ_11505	MATERTNQEARSATSDQSDYPSETESKQMTQDSQSNQVDRTNTGSQGAMNHPQDQQPVQPASQETGKKSSAPRVRLDMDLDVELQLKAKIQGDLELAILEN	uncharacterized protein FFUJ_11505
XLOC_013162	1.12824	1.5257	4.86035	2.18389	1.04182	2.27668	1.39395	2.36509	0.701719	0.275776	2.5862	0.232524	0.753778	2.49774	1.39225	3.58667	FFC1_12681	FFUJ_11493	uncharacterized protein FFUJ_11493	MDNSCEIPQGKEVSSSQVNDDLPTAEVLKIADGIEVLDGKGEKHTFKSIYSGPEVPRRVLVVFSCVSYTSFLAKNATPEKLQEINTEIVIIGHGDPRTVDMYCIDTGCEFPIYTDPSEELYKTLGMIRTWEEGPPNKYIPISSLQNAWLSMKNAFWKLLEGYPVWNWGTTNQQGGEFLFAGEGDDKKVTWCHRMRNSRDHTDTNEILEVLGLGK	uncharacterized protein Y057_11016
XLOC_014179	0.21057	0.655158	5.95766	2.3539	0.221325	0.1407	0.258724	0.438876	0.0713794	0.389309	2.20048	0.797178	0.179479	0.0748288	0.318496	0.221038	FFC1_12982	FFUJ_04654	related to 2-polyprenyl-6-methoxyphenol hydroxylase and related FAD-dependent oxidoreductases	MSKLRILISGGGIAGPSAAFWLSRLGHSCTIIERFPSLRTGGQQIDIRGQGIEAAKRMGILEEIRNKAVDEDGLQWVDSQGKQKALLERNDSGKGRQSFTSEFEVMRGDLCKIIYEATRQRAQYRFGTSIESFENVGDKVKVIFSDGAHESYDLVIAADGQGSRVRRKLFADDPEAVHVRDLNLNGCYYNLPREAGDKNLATVYSAPGRRVISTRWHSKDRGQAYLMTMSHVEELKEVMIQDVNAQKKLFAEIFKDAGWQAPRLIKAMHETEDFYAQSVVQIKTKTWSKGRVVLLGDAGYAPSPLTGVGTTLALIGACVLSGEIARHGHDIPRALKAYEDTLRPYVEKSQKLPSFVPGIAYPKTNFGIKLQYSIIGLITKLKIDKAILAVLPENKGTWR…	related to 2-polyprenyl-6-methoxyphenol hydroxylase and related FAD-dependent oxidoreductases
XLOC_014186	2.27367	2.93498	11.3157	4.25884	2.27047	2.50964	1.90378	1.85913	0.567181	0.9059	5.50632	1.25561	0.172236	0.269951	0.311348	0.638994	FFC1_12995	FFUJ_04669	related to helicase-like transcription factor	MPGRRAKRAHDLIDLTGDDESETRQKRPAPSGHHNQQQHSPGQGGTSVYGSSSSQAAPSSTAEPDYLDLTQDDDGPPLELYGTFDGKVVGVRYYRGYASAGENVLCRREPNNQYDSNAIRVDNVVGDQIGHLPRKVVEKVAPYVDRGDVVLEAQLTGEKGFYDCPVKIFFYGPSDPEERSRIEDSLKKDRLVKATELKNTRKEAEARRKAAMGLVNGSSTHGLGQDLAVPQKPEITMDNVLQKSEAVEMRKGGDAIKSLAIGEDELAKMPMAEQPEQLKAQLLPYQLQGLAWMTSKENPQLPSKSSKEPVQLWLHESNNRFHNIASGFVTSRAPKLLSGGILADDMGLGKTLQIISLILTGGTGPTLIVAPVSVMSNWSQQIRRHVKGDQQPSIFVYHG…	related to helicase-like transcription factor
XLOC_013903	0.059691	0.141479	0.883565	0.662931	0.0240599	0.0192865	0.0498692	0	0.0955853	0.126783	0.0893022	0.434808	0	0	0.0426013	0	FFC1_13138	FFUJ_04804	uncharacterized protein FFUJ_04804	MAPPNPIFTPTNGKCLGAQEFYAGLDGYVNPDANVHEEYQSSLRHANPQSFFDDAFCSYDDSSITQEDIFGARIVHHTETDIDSEDSRPKCYVDEDSNLDDPESSSTNPTPPVELFGPFAPVGSTINPRLLSSIRSAGIETHIKHNATEKVLLQTESTTADSKAMQDQIKADFDKEMLQDAMAILKLQNLIILSKHDQACLKKDIYIMMDRWATQELADTLLALEDQSTVDGIYKIYQLLLSLIKDYLDKATSDFLPRAYRGLAVVDSGLTYNERQGLEGGVDLDILDKPGRKLLFWAFLRHELMSKVRLYVAVIDRSYRPPAELSRRGGHKFLPWEDEAIRCVHTYIQTLYTAFFSEWSGAEVPDPPPPGLGRSSNIVCETTRWVEALTNDKSVCATA…	uncharacterized protein FFUJ_04804
XLOC_013908	117.611	198.504	370.102	294.225	45.004	75.3684	95.6118	107.275	32.5356	102.986	196.063	138.251	13.8657	26.3358	20.6832	36.6041	FFC1_13144	FFUJ_04810	uncharacterized protein FFUJ_04810	MASHHVLLLGGHGKIAQLLTPLLLKRSWTVTSVIRTSEQTPAIEKLGAGLPGKLNVLVRSIEDITSQDKALSILNEVKPDYIAWSAGAGGKGGAERTFKVDRDAAVHFINAAASVPTITKFLLISYLASRRSGASWWPAGEWDEYNEKVNNGVLANYYKAKIEADETLYKVSKKSPTLVGIDLRPGTLTDDPATKVEFGKTKSIAKNGVSREAVAEVASHLLAADGVRNGWYDLLDGDEDIPAAVERVVRENVDAAEGEAIYDA	nad dependent epimerase dehydratase family protein
XLOC_014077	13.9027	18.0664	94.6242	66.9622	0.287431	0.305633	1.67818	0.763141	9.12606	7.14644	17.2997	5.6988	0.420971	0.27668	1.77547	0.758302	FFC1_13476	FFUJ_05128	probable CTT1-catalase T, cytosolic	MAPSATDTSFAAHVANQFQSYESDRQATSKETLYTTSNGVPIAHPYETQRAGENGPLLLQDFHLIDLLSHFDRERIPERVVHAKGSGAHGYFECTDPLDDLCLADILSEKGKKCSVSMRFSTVGGESGSHDMARDPRGFSVKMRTDEGNWDMVFNNTPVFFLRDPAKFPHFIHTQKRDPSTHLTHADDSFMFWDYLSQNPESIHQVMILMGDRGIPKGYRKMNGYAGHTFKLVNKAGEWVYCQIHLKSMQGIDFVTQEDSADYSPDFSQKDLYEAIQNGDYPKWTLEVQTMTPKEAEELWEKQKINVFDLTHVWPQKQFPLRKVGEFTLNENAINYFAEVEQIAFNPSHLPPGVEPSADPVLQSRLFSYPDTHRHRLGVNYQQLPVNATRTGYQFGNFQ…	probable CTT1-catalase T, cytosolic
XLOC_014958	0.384495	0.365601	4.0845	4.65482	0	0.0363041	0.055664	0.0623549	0.118991	0.241986	1.48046	1.58849	0	0.0610823	0.0573466	0.030356	FFC1_13714	FFUJ_09120	related to 4-hydroxybenzoate transporter	MPPSEEMSKVDGDTLPSSQVENAQGYNSRNPLLHNLDGLTLYEKKCVLINREIDAQGMGKYQWYIWGLCGFGYLLDLLWAQAFGLVLGPLQQELGFGDDESGNISTSFNAGLTAGAFVWGFLADIIGRRWAFNLTCLISSIFGLCLGASNNYTTFLVLTAFVGFGVGGNIPIDTTITLEFIPQNKRFLLACLSVFQPIGVVLCSAIAFGFIPVYACSPNFSEPDPLVSCNNAEAGEACCSRGDNMGWRYLLFTIGGITLAIFILRFFVFNFRETPKYLIYRGRDGQAIETLQHMAEVNKKQCGLTLELFESLQADDSSLGSGNSATPALGAGTKQLNMAWSQKAKLELSRYKMLFSSPKMTRLTVLVWLTYIMDYWGFTVAGFYLPSILALKNGAASVS…	related to 4-hydroxybenzoate transporter
XLOC_014565	0.392372	7.68957	26.2197	4.94164	0.050566	0.109837	0.323978	0.185664	0.161926	3.82732	1.97381	0.895196	0.0488168	0.0588822	0.332156	0.159184	FFC1_13715	FFUJ_09119	related to flavin-containing amine oxidasedehydrogenase	MSPEPFNTDLEHDGAGLMAQNGDKGRDGRKKVLVVGAGAAGMSTAYHLSEHSDKFDVTLIDAVDYCGGQAFSIPIDKERHGASWCNQGVQGGSYIFHHTVTMFSRQGYHADPCNLHVSFGKDETFWNNVFPTQLLVRHEKEVRRLTAVLKFMRWFEIFFALLPLKLVFKLFLFSEEFTNTIALPMTALFLGTGNATPEVPAIMFERLCTSPTYGMWYPSDRNTVISNKPPMIVFPKFSEFYETWRKDLVSRGVTVRLSTELTEIVQRNKNGVVVKLKARTPMPDHHNPNGGDPDAPVGEEKYDEIVLCCLADTAKKVLGRTATWKEKKVLGSAKFSDDITITHNDSDYMKKHYENFYRDDLAVANINGTDQSDRLAFAKTEYRPMYYIKMYPEDKSKLE…	#N/A
XLOC_014674	6.68731	8.97583	21.0766	9.6998	2.90928	3.21305	4.62726	4.04314	2.46683	2.84339	4.18323	0.174551	0.213715	1.0603	1.56827	1.65909	FFC1_13891	FFUJ_08950	uncharacterized protein FFUJ_08950	MASPSTLMTVTPPTATATATLDALTQHYHGKPNHSDKIVIIGLTVGMVALFLLFIAPCCCMQYLAHRQQRKEKKANACSTATMTNTIHRRMSDTSVVIAIAVSCAAIVVIFFAAICFCHWRSRPKSPTGTRSRDHDDSDANSNVEMDAIPDGSLNHPLVRGRNGAGHVYPVFEATRERHAHAQN	uncharacterized protein FFUJ_08950
XLOC_014698	0.537125	0.923128	1.88297	1.07861	0	0	0	0	0.362889	0.59904	1.19089	0.629401	0	0	0	0	FFC1_13925	FFUJ_08916	related to pisatin demethylase	MVSLFFERGLTWLPYFIIALFTWFILSSVFSWYRLRHIPGPIFGKFSYLWVAYITITGTQHDHLVNLNRRHGPLVRVGPNEVLVDDPDLIRKVSSTKNTYTKGNWYHGGKFNPYHDPMFQITDPVQHDRVKAKLSPAYSGRDAPNLEAVVNRQVGSLIRLIKEKYISTQGDYRPMEGTRVTRLFALDVISNLSLGQEFGYLKADSDFHGIAKALNEHLLVMTLATDIPWLRNLIFSPMFLKLFGPTENDTKGIGPLMKVANTIVRERYAPEADEQHDMLGSFKRHGLRLEECQAESLFMFVAGSETTATVIRVILLYIVASPHIYRRLRQEITEAVSEGRASNPITDVESRQLPYLQAVIYEGIRIRPATTGMFFKDVPAGGETMHGKYIPPGTSIGIN…	related to pisatin demethylase
XLOC_014857	3.72662	4.02134	15.4607	8.95524	1.69587	1.5879	1.92363	1.56295	0.228756	0.214902	5.03866	3.20626	0.458723	0.538923	0.517679	0.748556	FFC1_14233	FFUJ_08621	uncharacterized protein FFUJ_08621	MAHHPMDYKGLVQQNCHMSAESSDADFQVLTRIDLSRQWHAFVLKTEGGKRTKYLEEKAPRPERALELLHEASARLVDQYVTCHGYDLPPGTAKSSSGMRGGSVKPDVIACSSSDSEAFASDSDDSALPPRRSHRRSHRSGRAEGEATSTRPGRVEADSGSESDEPTSRRTPFWVSPPRSTGMPPHGHPPPPQPWGYSMPMQTQTQAPAPAPVSAPIPGIRPGHSMVPPPPGRKIPIPIPPMVGKSYPARLNITWAGNGKRNMLVNVSPTVHYLQQVAVNEANMRPTGFVNSSSTPYLPLPNHSSNGHALLRAMVRRVTLDEDETYEIAAFGNDLSALFRSSSSIPKFEIEIVNANVVPIFPPMPPPRPASVASSRSSVEIAD	#N/A
XLOC_015295	1.60995	1.9408	8.49527	8.04607	0.8792	0.606347	0.665954	0.913176	1.3768	1.03853	3.89444	3.38695	0.647301	0.755705	0.117887	0.909622	FFC1_14398	FFUJ_08083	uncharacterized protein FFUJ_08083	MMQISEVFPWYYQLLFMILEPSVIFIALFFIPISPSNHFHSLAPSDSTGPFWSPSAIHKLCDAHSAWNTPQLRGLWYSYISALAFSGIIEPMVLYVARYKLRDIRDAEEVIKTVLVAFIAFDIFHASATLAVTGTAAALPGSQSHIYAMVNVWVPMAWMLLRILWIVGAGRKSAMTGMKRE	uncharacterized protein FFUJ_08083
XLOC_015296	2.5895	2.2452	9.99325	8.86808	0.484263	0.248762	0.138903	0.422241	1.30921	0.448138	2.12552	2.40423	0.534746	0.329581	0.0714506	0.404947	FFC1_14399	FFUJ_08084	related to 3-(3-Hydroxyphenyl)propionate 2-hydroxylase	MSSPNSNFFPVIIVGAGPVGLITAVNLAKLNVPVLILERNHQVDQSPRAAVYQPCAQAELLESGTLDDVRKESVLNDVMTFWKNKERVASITKTQDADVFPAGLNCPQPKLAKILVDHLLKKYNAEIKFCQKVIRINSDAGQDTVEVVTLDTNTNLEIRYTCHWLVGADGAGSTVRRLSDITFDGFSWPKEDFVATNVRFDFMKHGFSTANFIMDPVHWSVVCILDDAGLWRCAFGVKAGMTNDEIRSEIDEHYKHIFPVWPAEYELVELNKYKPHQRCASTFKKGRVLLAGDAAHSNNPIGGLGLTTGLLDAGPLGRALGAVINGRAPEDLLDYWANARRDKWLTFTNAFSIENKRMIQMGGYSEDPLGIWADDEVAKEHNMEKWVRTATPEKRREDT…	related to 3-(3-Hydroxyphenyl)propionate 2-hydroxylase
XLOC_015519	5.22166	5.6452	18.7903	17.3629	0.608329	0.331532	0.124624	0.17149	5.80423	2.55818	7.61944	8.11801	1.05366	0.591135	0.215857	0.297031	FFC1_14400	FFUJ_08085	related to triacylglycerol lipase II precursor	MCRTCTSRRQSGRQRIDLLALGPRDEPVGSDVQTSEVLLSDWLCSSTTAPRVNLGYAKYEGVALSSGVNQFLGMRYAAPPTGSRRFRLPDRPLNETYLVQAHKHGAVCYGVNPSVPTPDLEFSEDCLFIDVYAPKNATSNKDGGLPVMLWIQGGGFVQNINANYNGSGLIEATQGNMIVATFNYRVGPYGFLANHELEEEGNLNVGLHDQMAAIEWIHEHISKFGGDPSKVTLFGTSVGGGSVLLQLLAYGGNSTNSSKQWSAGIAESMYLPSVYTVDEMQFHYEHLLTATNCSDLECLRQLPIEQFQAKNVAIPFPGQHEPALFGYGPTIDGSFLPDRPSTLLRQGRFAKDKSMILGSSNTEGTVFAPQANTTEDVNQFLTAQLPGLTETALNRLNQL…	#N/A
XLOC_015307	0.791364	1.68861	3.6418	1.37595	0.753131	0.574102	0.718888	0.945873	0.360529	0.291218	0.744103	0.157051	0.383064	0.369025	0.106785	0.51917	FFC1_14420	#N/A	#N/A	#N/A	Zn(2)-Cys(6) zinc finger domain protein
XLOC_015355	0.289114	0.296569	1.55726	1.25874	0.0460846	0.133849	0.124951	0.0737851	0.160293	0.0925042	0.198819	0.527742	0.0154232	0.0164224	0.0785383	0.0429095	FFC1_14530	FFUJ_08217	related to linoleate diol synthase	MAEQKNGVATNGYEKNASPASSSTKSEAKPLPNGDKKDGIVKSFKQLRVASKRPLPKEMGDGSYRVVEHRPGLKEDIRRLRGRDLKTLLEIVKAKVKGETQQDDKTMIMERTIQLVANLSDHSKVQESLTNSFISQLWNSIDHPPMLYMGDKFRFRQPDGSNNNPYLPQLGAARTPYSRTVRPKGMSLGAQPDPEAIFESVFARDAFRKNPNNVSSILWYWATIIIHDLFWTNLQDPNQNDSSSYLDLAPLYGSTEKDRDSIRTFKDGQLKPDCFADKRLIGNPPGVPILLIMFNRFHNHVATNLADINEGGRFSKPAENLSPEAAEAAWKKRDTELFETARLVTSGLYINITLIDYVRNIINLNRVDTTWTLDPRQEMGVSVGTKDLSESGTGNVVSA…	related to linoleate diol synthase
XLOC_015378	1.49829	10.8862	131.691	11.4541	2.5442	2.26506	2.94822	0.93025	0.480775	2.80506	31.5133	4.01767	0.967915	1.67221	4.17874	0.640148	FFC1_14583	FFUJ_08272	uncharacterized protein FFUJ_08272	MKGNDEVIQEFNEVVNMTASELEDWLKSDDSNSAGWPKEDENGETVGHDSGRKIVEILKENPKKEPEKYTDEQVQHMRKVVSYCKRHLAQETKANNDKSPEEVKKTKSYASLKNWGHDFLKAQGRENGSEKKEEKEDKEEANDDAEEAEEEEGDDDDKQTGEKRRATRSQTGSNKKRETGKGESTKSNDEEEEEEEEEEEEEDEDGDEQKKQGQKKQSNGQSKKSNGSSKKEEDAEEEQDDGEGGDDSGAKKGPKKGETVSWNWGQGQPEGKVLDVKAEDTTITTKNGNEVSRKGDEEDPAVVLDTGKNKAIKKAHELN	#N/A
XLOC_015412	2.53134	2.64231	14.2003	6.48729	0.19438	0	0.636152	0.159291	1.62211	1.19544	5.64177	1.15339	0.171426	0.168915	1.10185	0.239307	FFC1_14644	FFUJ_08327	uncharacterized protein FFUJ_08327	MASVESQVSKQSEAPLQNDNENAEQLATLAEGKVADAVKGTSSRDKPRKDDIKIEDYTSDLEKKKSEQAEAREEIKTQRKAGVDVDGSLGQGRLSNEDNSSV	#N/A
XLOC_015817	0.708935	0.84486	2.80004	1.47324	0.241141	0.428071	1.64261	2.17637	0.638521	0.517464	1.80161	0.534465	0.236452	0.592541	2.41478	3.26459	FFC1_14936	FFUJ_02216	probable catalase isozyme P	MSNPVYTLTEGQPVRDPSVSTTLPVFGGGGLTTLGDTLLLETLAHFSRERIPERVVHAKAAGAWGEFEVTNPEIAQLTCAKFLDTAGKKTQVLFRLSTTGGEKGSADTVRDVRGFSVKFFTEEGNYDIVGNHVPVFFVRDPMRFPSLNRSHKRHPATNRPDATMFWDFHVNQPESVHTLMHLFGSRGLPDSIRRVTGFGVHTFKLIDSSGRPRYCKFHFRPETGHTSFASADEAEKKAGANADYHTEDLWDAIARGEYPVWKLYVQIMEPERAETFGRALFDITKIWSHKEFPLIEVGKMTLNKNPENYFAEIEQAAFSPSNLVPGIAMTPDPMLQARMFAYPDAQRYRLGSNYAQLPPNRPIAPVYAPFVRDGITTTKNYGGDPNYVRSTLSPGVTTQ…	catalase
XLOC_016060	0.0723642	0.137911	2.53534	0.596747	0.02128	0.0544697	0.0184626	0.0451539	0.0707923	0.171301	1.16681	0.265969	0.0363332	0.05724	0.0319783	0.0759735	FFC1_15025	FFUJ_02301	uncharacterized protein FFUJ_02301	MGKPNEALESSRAIEFAKNSALFLLSFIFLPTNALFALGAYLLNRFTSKTSQSHNDGDNLDKVTVLVTGVNMAKGLSLARMFHRRGHRVIGADCHSLSPGRVSFAIDAYYRLPPPSDPSKTSMNDPYLNRIVEIIHYEDVDLWVSVSDVNAAVEDAAVREIIEARTNAKVIQFGVEDIRRLHEKDAFIEHTKGLGLTVPLTEAVEDKEDVINFLQRNGGLEHKHGARQYLVKPVGVDDVARFAMPLLPLPSEEATLARIDSIPFESSKCSFIIQEYITGPEFCTHALIIRGRVCAFVACRSADVLMHYSALPADSLLSRAMLDFTLKQAEDGGDNFTGHMSFDFLINKEDEDAAKSGVEKDVTIYPIECNPRVHTATILFNNTPEIVDEYLSILTTSAP…	uncharacterized protein Y057_5000
XLOC_015869	0.0129592	0.0177056	0.968667	0.0360726	0	0	0	0	0.0231066	0	0.839717	0.0624796	0	0	0	0.0259909	FFC1_15026	FFUJ_02302	related to pentafunctional arom polypeptide	MSDMSATVEPTSKGFAVCGYEKIEYDFEFLDGVFNTANPQLYQLYSPWGRCLAVMDLNIFNLYGNEMQRYFDHYGIPLTIHKTMIGEKAKSMDTLLSIVDSMTDFGIYRKEPVLVVGGGLVTDVAGFACAAYRRNTNYIRIPTTVIGLIDASVSIKVAVNYGRYKNRLGAYHAPSHTFLDFTFLRSLPVAQIRNGFAELIKISTCAHKDTYDLLEKYCEQLINTGFGRSDDATPEIKEVADKICRAGIHEMLKLETPNLHEIMLDRVIAYGHTWSPLHELVPETPLRHGHAISIDMAYSATLAHIRGLLSSEEHTRLLNLFSRAGLSMDHPQFDASLLEKATAAILKTRDGKLRAAVPINPMGDCVFLNDVSHDEMVAALEEHKKIMKSYPRQGAGLEA…	related to pentafunctional arom polypeptide
XLOC_016208	4.97139	6.70545	25.1789	8.76384	6.98598	9.00629	6.75774	5.29838	2.33296	2.25326	11.403	2.92974	4.39813	7.9599	6.19761	5.43786	FFC1_15303	FFUJ_12693	related to reductases	MSRYADVHKNTSGPGDARPTALQIVRDEGLEGALTDKVFLITGTSAGIGVEVGRAIAATGARVFLAVRDLEKGKAACSSFLKPGQVDLIPLDTSDMSSVRACAAEFLEKSSTLNVLINNAAIMATPTRIETKDGFEQQLATNYLGHFLLFWLLKDALLKGSTPAFNSRVVNVSSSGHHASEIIYDDFQLKAADAYNPFKAYGQSKLAQIYMSNYIDRVYGPKGLHATSLMPGGIASNLQKHLPESVHKDMKENPTTINFMKSPEQGAATTVLAAVGKEWEGKGGKYLENCRPSMPQPLIPGMMGYKDYVYDSEKENRTWELTLETLGLRKTS	related to reductases
XLOC_016255	2.81319	3.44442	8.80996	11.8155	0.0214066	0.0889552	0.0557174	0.0605636	1.73249	2.13312	2.31107	8.11148	0.0365495	0.0480267	0.0965058	0.101901	FFC1_15383	FFUJ_12771	related to 6-hydroxy-d-nicotine oxidase	MHLNSLLVSSLFAASALAAPSASTKKACEEISKAIPGRVSQPFTINYNSQSSGYWSTALREIKPACVVTAKSAEDVSKAVTILNKYPDVKFAAKSGGHDPNPTHATAGDGVLISLNEMVGATYDADKKVAYVKPGGEWNDVISQLNKEGVAIVGGRLGLVGVGGLLTQGGISFLSAQYGLAADNVVSWEMVNWNGTIINVDAKTQPELAVALRGSGSQFGIVTQFTVKAYPVGKVWGGIRTYDESKTDELYEAMHDFIPYSNEDPKAAIIVTSLILTGSSRINLLFYFYQGEKPPTTGAFADLLKIKSTLSTTKTQSYPDLLKSNGAGVSLLNSRISFRTATIPYFPKDSTVYAEIADKFVDITSTYFKNLRGLASQCSVDFQPLPSAIGKHTEERGGN…	related to 6-hydroxy-d-nicotine oxidase
FFC1_15890	0	0.0463099	2.42995	0.495911	0	0	0.0377441	0	0	0.0802113	2.17003	0.44549	0	0	0.0653749	0	FFC1_15890	#N/A	#N/A	#N/A	uncharacterized protein FFUJ_14129
XLOC_011209	4.42403	7.40059	20.5342	8.32483	0.21294	0.612273	0	0	2.96212	6.645	7.79984	2.37602	0.363571	1.37355	0	0	null	#N/A	#N/A	#N/A	#N/A

## Sheet: Slow induction
Probe	WT_0	WT_15	WT_60	WT_240	WC_0	WC_15	WC_60	WC_240	WT_0_desv	WT_15_desv	WT_60_desv	WT_240_desv	WC_0_desv	WC_15_desv	WC_60_desv	WC_240_desv	Feature	IMI	Protein name	Seq	Description
XLOC_001465	1.0754	0.955542	2.52018	4.93859	0.213123	0.241241	0.217884	0.0640228	0.137187	0.223828	1.79737	2.42675	0.208017	0.0918251	0.154932	0.102067	FFC1_00526	FFUJ_00481	uncharacterized protein FFUJ_00481	MDTTIQMVPQKANSRKVRGFSGFDYLGRFTTATFELVAAATSAYGDKYEWGKRFGHRVMIKVTEENRPFIEVVRGNYEEDEDEEPDEIVAFMLPYPGFPRWEDRLTQVSGFCEGADFAIVNFIHPGPEISRFRDTQEPRAWMFDCHLNPQIPVPPNPLHDRLLTNTEFYEALQQERFSKDSENEIIGNTRRIYISNPNGVSILALLKRTPASQVDGFRKLFANYLNPSPVPELGLTETPLALRGRDNIDFLNLKPTTAPINQQQSSCVPDNAVLHVAVFSLMITGRSEQHSTTICLDDEFFDQESRLMSEEEVLILGGREDPITLQPEFKRARSPRAYLLVALDRQLERIVDYHANAHDCLKNSIEIYIAIPEDRSTAMDEWIKRFPLILNKLVHFNSR…	Arginine--tRNA ligase, cytoplasmic
XLOC_002123	2.17475	1.74293	4.48543	8.20311	0	0.0471447	0.0291145	0.0701152	1.37157	0.26555	2.33278	1.68408	0	0.0420304	0.050428	0.121444	FFC1_01789	FFUJ_01678	uncharacterized protein FFUJ_01678	MPSLICNTHTSLPVQKPAPFVVGPTNKAPFRPTNKIPQDVIDTAQATPVEEFDAKKHVNFEFPKRTYTMKEWGYESQGVSPIAASDPFSLFTEAAVKQVRRELLSEDVLRTCQYASAFTKNQIRGYTQKQAPFAHALCKSPEVQQAVSKVAGIDLVHAFEYEIGHCNLFFSDGEDEKKGASDNVGFSWHYDSFPFVCVTMLSDCSDMEGGETAVLKGDGQVLKVRGPTMGTAVILQGRYVQHAALKAIGKERLSFITAFRPKSPFVRDEIVLTGSRPISNQSELVYDYCTYRADVLEIRFREHAKKLREQQAAGIKFNPDAVREFLQEQKEMLEATLLEMIPIYDVVEAE	uncharacterized protein FFUJ_01678
XLOC_001137	0.484005	0.996365	0.74336	2.80883	0.598402	0.606675	0.544869	0.344671	0.441515	0.892662	0.633643	0.158519	0.586766	0.35777	0.292263	0.0499259	FFC1_02069	FFUJ_01941	uncharacterized protein FFUJ_01941	MPYQLLPRKAGDRLLSGDGEDAPFAVRSAGPTTPLGRARGRGSGRQHRLLPQPKRRSPTQAQTSAFFDLESVCSHINVNDIKDEQQENRLTATKPQSHFARIFSESVYGHGGDAFVKDEDMDAGCSERQFNKRVPRTAISISIYVASN	uncharacterized protein FFUJ_01941
XLOC_015888	0.340847	0.299552	0.705291	1.37648	0	0	0.0647041	0	0.0573219	0.207402	0.669409	0.655395	0	0	0.112071	0	FFC1_15063	FFUJ_02340	related to hydroxylase	MSGFKVLIIGAGPTGLLAALALQRAGIDFTILERRKEADLNWGASVCLWPQSARVLDQLGLLDEAHALHLPMKKKCNLRRDGSVMSWSNMIENIGHYHGHEWMLFQRGDLVNLLMGDLSDITNQLLVDKQVTSIASGPDGVEVKCADGHSYSGDLIIGADGINSTTRTFVDDIAPDATSGDFTTTFYGFYGHGTTVSKDLEPGVDYECHSEGFSSQLIMPSHEKYFFTIYLKLDKPTNDRYYISAEEADELAKKYGDIYLAPGVTFKEVWAAKNWTHTAPFEEGVAKKWFRDRVVLVGDSVHKMTPNIGFGLNTGWQSTVVLINLLRDLLRDNPNPDIKELTKTFEEYKKMRFNHVTKDVELAGTSTRAVMWDNFLWKFLDQYVLPYINGDTILAKLMC…	related to hydroxylase
XLOC_007822	0.237261	0.323393	0.345533	0.998678	0.156698	0.24063	0.0786599	0.153898	0.0320613	0.182397	0.106518	0.472115	0.168695	0.0728116	0.136244	0.138682	FFC1_07891	FFUJ_03455	related to chitin binding protein	MKASLPVTLASLLLHAGTVLSGPVFAADDLLSLRNSKLRKRAECGLGIGSCNPGSCCSESGFCGTTGDFCGGSACQLEYSDSCDTFFGPRGGSTEGISRPQLGNVPYGTVITTCTTPGVIALTFDDGPLDYTNDLLDLLGERDVQATFFVAGNNRAKGHIDDSSNPWPAVMRRMYSAGHHIASHTWTHRNLNEVNSTIRRSEMIYNEMAFRNLFGWIPTYMRAPYLECNAASGCLDEMSELGYHVVDQNIDTKDYENDSPALIQISKDRYSAGVSSNSDSNQYIVLAHDVHDQTVHNLTAFMIDTAQDRGYRLVTVGECLGDPRENWYRTVSRGRDVTSTESAAPTRTVPPTNVSVTTNTATSTATGGLAISPNQQCGGNTGYTCQGSAFGSCCSWYGY…	related to chitin binding protein
XLOC_007923	8.39372	11.2466	15.1033	30.1816	0.164659	0.231815	0.125701	0.0220326	1.37098	4.38204	6.72041	12.4366	0.227961	0.294355	0.197378	0.0364623	FFC1_08086	FFUJ_03646	uncharacterized protein FFUJ_03646	MAGVAKEAVVPIEAVLFGISTLLVLARLALRTIRQHQSLTVSDWFLIASLLDAAALFGTDTAAYNLGGMDEYDPSAPPRSIEDQITLMKVSFAGNYFYDTGVYFPKLALLALYFKLIPQTLPLLRKFLYGVTALTGSFMLTTCFLDTFWCGANVSVNWELDGKCSTFDSKTVFRIDWVMNLISDMLVFALPFPLLFGLQLSRRYKAGLVAIFASGLITLGASIGRFATVEAIHAWTNVYVLSMTEIAAAIVVVSLPALKSLLHGLGLRSSKQNTTQTGSGYNKHSGTVTTSSHFNKLSSGRDHHSRELYASTARVAAGAEEDSGSEVELTNLQGIYKSARISVTYQRREDGDWQGNSGRG	archaeal flagellin N-terminal-like domain-containing protein
XLOC_014257	1.39187	1.06047	4.01752	6.24299	0.0837972	0.0380665	0.0626945	0.0357352	0.442908	0.608793	0.75531	2.733	0.072255	0.0332064	0.0953677	0.0314578	FFC1_13145	FFUJ_04811	related to G protein coupled receptor like protein	MEGHPEHHRGPNFSPEHIEILITIERVGAGCSMIAIILVLLTFGFFKKLRTTPNLFLIFASIANAGASVASMIGYDGLERGEGSHLCQAQAFIFEWFMQSDPWWSLAMAINVFLVFFCNADPRMFRKYAWLYCLICFGGPFIPAVVLISIRNSPEGLIFGDATLWCWIGTDWSLVRLYAYYIPIWIFSFLSIMIYIAVGYHVFHTRNQIRHMVMDVVGNIEKNDHIPYSSSEHRGSSEAVASPPDASEAGQADFCPQNLTPRQEFYGTAVTEVQITREEPRQVIQQETTLPSPPLAAMPPRIQSWALPSSFKHIERSTSSRAQRFETLCTSDSSRQPPFSVMTKLRAVKSNASMKLRQFDPVKMAYLRTSFIFGLAVLITWIPSSANRLYSLTHHDRIS…	related to G protein coupled receptor like protein
XLOC_014427	0	0.112086	0.193251	0.379109	0	0	0.0482708	0.0177181	0	0.111657	0.175111	0.236058	0	0.0375773	0.0812173	0.0306888	FFC1_13440	FFUJ_05094	uncharacterized protein FFUJ_05094	MSDSCDHQAVYVNCSSAAANAGFVRPSPEQRTLAMSKTSRLARGVYLAKEDPMHDEQTFPGPLVLPGDHLAEHPKEQGQPCKDWFASEPTQKRFQEISTRKKMYVFGPPSVKRLPEEMRSWASPVLPPGFPPCPDRWTWTLKQYKQLIIYLRAFFTTMPISQFAHTAHFELIKGRRRVHFEDTPQTSVIGFRGKDGRDTFEVRHRPSPDGLSKMQLNVSDLRTALAEIKAEPAHSVVMVLNHDLYEEEEGSYITERVWVEDGVAIVSTFRRNPCFDRMTGIDRLHRWPASHCQSYVDTRNHLSFKAFGKPPGDSALGLAIKAANQAGQPSSMEDLSYLWFARVLVAVSREAARCFGLRNCTYYACLMQGVSGMRQAGETPPYLCPVCYSKLGSELVLLK…	uncharacterized protein FFUJ_05094
XLOC_014076	0.321634	0.144105	1.33013	1.99011	0	0	0.0232849	0	0.278983	0.0706256	0.568552	0.688514	0	0.0432793	0.0439064	0	FFC1_13475	FFUJ_05127	uncharacterized protein FFUJ_05127	MPSFQNITFGVELELMTPLPDSRRMWRFISPSAASRFNMADLLARRTSLPIAVQCCHPPDDRCTICATVPKENQFSGDCVLQFPETLSYEEDVSERCFIFKGEFLEFAHPLSHQRSWDGVEITTPVFHAGELDDGLATMKTALTNLRQLGLDISVDDSCGMHVHVGVETGMTILLAQKITTLVILLETTLLLRLVAPPRWKSAFSLPICENSSLAMDMDLHKPLEDPTALNQHVPCMSIMKPGKWNNWYPKHIYKMLYGVWGSTILADLSLRLKKAYMNRCGFALSLRNHKVSGAENLEGSPTTVEFRYSQMTFDHELLRNWTEILARIVVIAQGDAEGFKRCIEKIIIINGRGDRDVWKGLMTDVLGLGHRVPQWEEQLKCFERGEYVSHLDDELLLK…	#N/A
XLOC_014078	2.25249	1.78404	5.83218	9.39144	4.58221	21.0095	7.90383	7.16691	0.812431	0.153157	1.81807	2.04887	5.07428	30.2738	4.84158	4.41571	FFC1_13482	FFUJ_05134	related to acyl-CoA dehydrogenase, medium-chain specific, mitochondrial precursor	MVDFKLSPAQQEARRHAQAFANTILTKAPAEYNAQKDQFSRFQATRPFYREAVRHGLIKAQVPIPLGGTMEGLVHESIILEELFAVEPATSLTIVATALGLMPLILSDSTALQEKFLKPFISGEGEPLASLMHSEPGGTANWLQKGGPGLQTTARKVGNEWIINGEKLWPSNSGGWDYKGADLACVVVRISDDPSKPQDPNVEPATQIAVLLVTRETIANNKEEAYQVLGEPELAGQITASGPHTRFTEFRVPHENLLCTPGLKAQGLIEQAFAMSAALVGAMAIGTARAAFEEALAFAKSDSRGGSKPIIEHQSVADKLIDCKIRLETSRLLVWKAVTTLEDEALEWKIKLEMAMQTKIYTTDVAVECVIDAMKAVGMKAYAKDMSFPRLLNDVMCYP…	related to acyl-CoA dehydrogenase, medium-chain specific, mitochondrial precursor
XLOC_004284	0	0	0	1.57754	1.60927	1.1085	0.829454	0.60772	0	0	0	1.72683	2.08002	1.31308	0.749386	0.460226	FFC1_04283	FFUJ_05778	related to cofilin	MASASGVLIDQDCITAANDLRFAKGSSKIKFVIFKITDDEQRVVVEETSPDAEYETFRQKLLSAVDKSGKSAPRYALYDVDYDLGEDGKRTRTIFISWVPQTSSIKLRMLYASTMEYLKKAVNMSVFIHADNQEDIEWEELVKTASGGKAK	related to cofilin
XLOC_004742	0.223292	0.260469	2.17324	4.74941	0.164557	0.0680046	0.237865	0.391048	0.17608	0.326998	0.469405	1.87553	0.138083	0	0.231132	0.512225	FFC1_05110	FFUJ_06572	uncharacterized protein FFUJ_06572	MKFSIASTLLLANGIAAMPWSSLSAKQSNGEEITLRIQVSQPSSNHAVTPNHKGVVNVHNYEVCLKVCWPEEPTCPEGWNSKKFGDSDYPCWTCCKKTGDDDL	putative pathogenicity protein
XLOC_002390	0.153063	0.0769495	0.111565	0.548078	1.68191	2.01995	1.08398	1.05363	0.0468186	0.0460747	0.0952235	0.136053	0.448092	1.33575	0.556369	0.214129	FFC1_02289	FFUJ_06769	uncharacterized protein FFUJ_06769	MRSKATLCALWASLLSFCLAASCDQLSNPYQGPDDTQFEITCNAYSLGGNQIGPTIEVTDLSSCIELCATTSGCKAALFDRSQYLCYTLDESDGPASNSLYDMAVLLSSAASTTAITSTALPTTTTAAIPAPTPCNQLDNPSYIDDVEFTIFCGKQATGGSQVDYSNQMRSLTECMTFCADTLACRAVTFDNWFNDCYLFDGFNGFMSDSNKDMAIASRPVASSTTEAPTEVSTTTSIAAASTTAPSGPLSCEQMAGSVYTGPNENKFTISCDTSSTGESIYRRDEEDSMQGCVDRCDRENRCIAVNFLPSPYYECDLIESFTGTKSSPSTNFASKILSSASTSASSETLSTLYTSSSASISSGFPETTSSSLPSTLTSESMTASTLESLSFTTTSAVT…	uncharacterized protein FFUJ_06769
XLOC_003350	1.52679	1.21223	4.99898	8.88729	0.544466	0.325462	0.343538	0.747829	0.691435	0.2922	2.82085	3.73697	0.384355	0.338208	0.236646	0.10525	FFC1_02545	FFUJ_07012	related to hydrolases or acyltransferases (alpha/beta hydrolase superfamily)	MSVQAVRNRSTSSTQRLLSTSSLTHQTFRLSDGRTLGFAEFGKQDGKPVFYFHGYPSCRLEAQPIDGIAQRCGVRLIALDRPGFGLSTFKPGYQILDWPTDVMEFAQAHEIPQFSVFGLSGGGPFALACAYALPKRTVTSVGLFATAPHWAAGTKHVEYYRRFFKVWAEYSPSTLRGALYMLYLSIRWVVLSGPVSRRLNNWLEAERKKEESESGESKPKSMSLEELVDMVLDEPFRQGADAAVHEMNLLTSQDWGFDLEKVQYGDIQMWHGKKDVNAPIQMIRYMAERIRGSELHEFEDETHYTMYKHFEPALRKLVE	related to hydrolases or acyltransferases (alpha/beta hydrolase superfamily)
XLOC_002548	0.704845	0.752804	0.807784	2.39016	0	0	0	0	0.0832394	0.0488268	0.269961	1.10829	0	0	0	0.0211176	FFC1_02590	FFUJ_07054	related to laccase precursor	MYFTRSSLIFLPLVLQSFIISVTATYWNNTKKFDLTITWENYAPDGFSRKMLLVNGQSPGPVLEINQDDLVVVKVYNQSPEELTIHYHGLEMKGTPWTDGVPGVTQHPIKPGCSFTYKFHATQYGSFWYHSHHRGQIEDGLYGAIIIHPRPHEPNPFHLISDDKETLYEIQKATRHVKPVVISDFVHLTSTEKWDMTVAAGIEDSCYDSILFNGKGRVECLPKDLVAANLNEIQKSYLELVPGGAEFTDKSCLPASALNALAGGLGNEEALLPGTFSGCKETEGQIEVIRVSNKHHASSKWVAFDIVAAVNFVNGVFSIDGHDMWVYAMDGSYIQPQKVQAIAATNGDRYSVLVKVEKSGDFKMRFNSNSAPQIITGHAILSVDGFGYTQEAESWINLV…	related to laccase precursor
XLOC_002791	45.5837	43.48	73.5607	153.935	1.00418	0.344928	0.829996	0.93515	28.7239	15.8339	16.4056	43.8925	0.63975	0.271892	0.498505	1.04754	FFC1_03051	FFUJ_07490	uncharacterized protein FFUJ_07490	MEASNRNDLNGTIGNSCEEAQAFNNGRKKLGVPLVQRRIVRRWICNRNVLNNAMCSHGALFEILSRWRLELQNGPRNAKKVTKQRAGRQLWTRGREEGD	uncharacterized protein FFUJ_07490
XLOC_002960	3.90576	3.71136	8.24313	12.7678	0.806705	0.768632	0.607039	0.491773	0.437173	1.08953	5.84421	6.38423	0.282607	0.275644	0.463692	0.170445	FFC1_03348	FFUJ_07776	related to Acyl-coenzyme A:6-aminopenicillanic-acid-acyltransferase 40 kDa form	MLEVHCSGTPYEIGHRHGTAAKDRVVGSIAFYKDLFQESCAMNWETVRQEAQQYIQPLRKLSPRYVEELQGLADGAGFELVDIVALNVRTEITFGLYTRVPSAPIQTDGCTSAAYRQPNGEVLLAQNWDWQPEQAPNLFVCHISQPGTDIPDISMVTEGGVIGKIGINSSGVGTCLNAIRARGVDNTKLPIHLALRTALESHSAHEAADKLYELGTAGSGHILVSDPSEAIGLECTSIGIKEINFDGNGTLIHTNHLLLDHPGVDEPGWIPDSTDRIKRIAQLLDERLASLTIDHSSFFDFFKDEQGYPTAINRDQFSPGNGKATLFTINMDLAKRKAIVTMGRPTNWTERIELSPGLA	related to Acyl-coenzyme A:6-aminopenicillanic-acid-acyltransferase 40 kDa form
XLOC_009802	2.28063	6.726	3.99693	10.8637	0.196984	0.446508	0.603334	0.312446	0.410892	5.54475	1.48756	10.2691	0.216825	0.0880086	0.018682	0.0630431	FFC1_09202	FFUJ_09183	uncharacterized protein FFUJ_09183	MALSSTIEKDIAIACICSALILSRCGYRIYHRYKGHAGSHRIWHADDMYMAIAVLPLISRTVCITLSFLLNPSSSREPATKDEAAAQNMTVDKLEHDRTVGLQLLVGTRLSYTLVLWILKAALLSFYSRFVRVTSWGKIAVNLLWCLLLVSCLVVIVAILAECRPMSLMWRLASKETQPACQKGMVYFFALAAGNISTDIALLILPFPTLAVARLNTRTKIQLGVLFSIGLLVITITIVRIPLILGDAMSQKARSTWATIEILCSCIVANTPFFYGLLRELGQHKGTQPSATDPSRSEGPFYLQSKGADHRSYELQAANSDGNSQELIIMP	uncharacterized protein FFUJ_09183
XLOC_009710	6.04446	5.46205	6.16033	36.3706	0.170222	0.330359	0.242209	0.335241	0.564531	0.779245	1.42693	34.7271	0.0305104	0.0459213	0.0785209	0.192141	FFC1_09018	FFUJ_09374	uncharacterized protein FFUJ_09374	MHIKYLLINLFALTVSVKALPDADNDFGLEARDDSDTLVQRWDCGHDAKEVYGKCVCNDKQLTWNGKKCVCPKDTTWQYGKCVPNKPTCPKPQVYNPHSKKCECPSGTEWKYGKCIPKCPYGQSYDKDQDKCVCPKGTEYKYGKCIPKCPYGQSYDKDQGKCVCPKGTEWKYGKCIPKCPEGQSYNQHSGKCECPAGTSWKYGKCVKDCPKGQYYNQHKDKCECNKGTEWKYGQCVPVCPKGQEYNKWSHKCECPKGTSWKYGKCIKDCPKGQSYNPHSNQCECPKGTEWKYGKCIPKCSNGQYFDKDQWKCVCPKGKIFEYGKCVCPENQVEKYGKCVCKDGFKFEYGKCVPECPKGQTYNKHTKKCECPSGNVLKYGKCVCPDNQVEKYGKCVCKDG…	uncharacterized protein FFB20_01859
XLOC_004256	1.99453	5.72229	13.3083	33.8359	0.0706345	0.0852961	0.0631047	0.11412	0.476489	1.08519	0.571193	5.41377	0.0716339	0.0436605	0.0954661	0.050402	FFC1_04236	FFUJ_09492	related to alpha-1,3-mannosyltransferase	MHRKVFVLSVPLVCFLLVTASLYLGRDHITRLSEAYLPLHAPSSLKTTSTETIDLPLSTSSDLVDSPVIEEPPSYSTLDTYTTSSIKVYTTPTISSTTSAAPSPTTTKSAIPIANGSVLSTERITPYIHAILDPTSKERPRLQCPPLDTKRYKDLQKKKDTRGDANDQHPIDFFFALNLRNIVDLLPRLMGSIVEAIQFLGPERCALSIVEGNSPDGTADVLVALRPFLEELGITYFYNNSAINPSKGARIRKLAQLRNLALEPLFKKKVPAADDTTVLFINDVAACPDDLLELALQRRKLNADMTCAMDFTYAGPDPTFYDVWVARTLAGDTFFPIPEDGSWDNAWDLFRGNREARMRYDAHLPFQVFACWNGATAFTAAPILNGLRFRDPKKDECFQ…	related to alpha-1,3-mannosyltransferase
XLOC_008889	0.358666	0.42208	1.1806	2.25068	0.0748604	0.0366688	0.108715	0	0.273199	0.169267	0.773838	1.46346	0.0653225	0.061696	0.1883	0	FFC1_08564	FFUJ_09807	uncharacterized protein FFUJ_09807	MSYLSTRPLPQNSTSMAFLFQPPIFGNYILPVVPMNVPTTPVALPQLTVAPLQLGQLYRPAFSPPIRIKVIYHRAGTVLASNDACYNYPPPRETVLGNLSWWSEQHGLGDKAYTRRCTLYLTRSYRSILTINPIDGPVSPPDLVKKVSFGDMTAPDFHTLMMGTAINNYGAFILVDHGYVPIKILAQQTDNDQSTPPNGSSNGTTDNSQNNSTGNTQPSPPSTSSTDAINTNAPEPSNAGDNTTVPEPAASEINTAPVATNSQPGSKMPKVASVEPGDTGE	uncharacterized protein FFUJ_09807
XLOC_009325	0.417322	0.462868	0.497597	1.45461	0.0128379	0.0120288	0.0465698	0	0.191408	0.442704	0.233719	0.264877	0.0228908	0.0212485	0.0718809	0	FFC1_08365	FFUJ_09998	uncharacterized protein FFUJ_09998	MEVIGTVLGLLPLACELMKSAQHLRVRLEAEHKNYLRSLRELNHALRIARTQISKENRMISCDVGKAVDLANETSSKESLSFCLDQAIISLEEAASLKTFRQSLESEPANTDTEKWDRIWRKLFPATSVNRFDLTKIVDPPFYDFGDSPRSIFDEAEPIKSGGWSEVSRVKIHLDRMHGYGDGEGGKATFAVKKIYSGTYQQYARERDALRRLSLAQSPHPHIVPLLASYRVENKYHLVFPSADCDLAMFWRNQPRPSIDKCTLEWFGGQMRGLADALYTIHGGNDQERKLSGVHGDIKPENILCFGSNDSERWPVFAITDFGSSYFLTPEEKDIPKGLKHTPAYRAPEIDTTTLGGITQAYDVWSLGCIFAEAIAWFYNGKAGIKKLILARIDEEDNS…	serine/threonine protein kinase
XLOC_011240	1.74248	1.39453	1.81302	5.98037	33.1599	37.1635	37.1426	30.7395	0.888828	0.921367	0.771494	2.13595	5.00932	2.62638	13.5872	7.3247	FFC1_11005	FFUJ_10373	related to nitrogen metabolic regulation protein nmr	MANDKLICVVGATGNQGGSVARRFLKAGFKVRGLTRNTASPSAQALSSAGAEVVAVDLNDVSTLKSAFTGANVIFSVTNYWEPFFRPDCREQAAKEGISCRKFAYNVEVQQGKNIVDAAATVVDTLDNNGFLVSTLSQAEKCSGGKFKELYHFDGKADVFPAYVDEKYPELAAKMSCIHTGYFYTSFNILPDSYMNKLSDGTFEMSFTTSPDALVPHLDPVGDLGNFTYAVYQMPPGKAYMAEGTTCTWPEWIETWGRINNVPVKYRQVTPDEMTAATPDRDAGIETGYMFSYTSDPGYDGGMKLLKAKDIREAGIDCPMTSWEEWAKKYDWSAILNK	related to nitrogen metabolic regulation protein nmr
XLOC_011533	0.718547	0.567667	1.28259	3.02648	0.413453	0.24702	0.300013	0.496928	0.420579	0.0965794	0.161626	0.0319905	0.198729	0.120273	0.147347	0.409665	FFC1_10471	FFUJ_10875	uncharacterized protein FFUJ_10875	MKHRQQTLAKTAKPIRRRRDRAHHPCPVDLPESSLFPPRRCSLLPLRKSPRHIRPSIQDVQRNGLPLCEVALFQNAAIPSPLAAKPERDTHLQLMASSRTSSLRSPAASALSIRSRSTRASLKDTYEARTWRNRLRRHSKSPRTHEPTPCCTSCFIKETPMWREGPFGSHTLCNVCGLLYAKREARSRLPSDFSCHIGADYQVPSVWVNSTSKAGEETTGKYSRLFEVDGQVITVRRDRLSLVIKDPRQLRSVDDDTPKISATITITKGDITTVQNFLWTLFQKSVVEKFEFEPQAGQVTQNRGEIRVNGYDAHLAIVMQAISFLIKKPDARTESLGRYLVWNLPKHLEELKNPERDHKVDNRAKKDIGSMLFDILGQGTIIRSHWKHFVDVPWFGNAA…	uncharacterized protein FFB20_02169
XLOC_011494	0.984876	0.617715	1.26862	4.49245	15.5912	23.0086	31.7134	34.6759	0.733984	0.411767	0.819974	1.63657	5.51127	7.49249	23.4552	17.1632	FFC1_10414	FFUJ_10934	non-ribosomal peptide synthetase	MASSVLDVSSPRGAAVPISFTRGTCGRPSFSTVTEAFFHYATTQPSATAARDLSAEPAVEISYGELAERSIRLAQRLRNLGVMPGHRVPLVVKRGVGMLVGILSILSCGAQYVPLDGGVVADETLRFVLQQTGGRIALSSKATAHRISNTDVTGVVIIEDEDNSEQSIADFTPVSKPENGCYVIYTSGTTGTPKGVDITHNNVTNLLCQAPGNLSIGPGTCVGQVLNVSFDMAAWETLGCLSNGGTLVMRGSDWSKALKQIDVLICTPSILSKYKPEDFPRLKTVATAGEPSSQQLADLWASHVSYFNCYGPTETTIVNTMHQHQTGQPLSIGKPTPGNNVYILDEFLVPVPVGEVGNVWAGGAGVARGYVDLPDKTTERFRPDPFTQEGSNMYNTGDL…	non-ribosomal peptide synthetase
XLOC_013322	0.882717	0.812803	1.40006	3.23092	0.108969	0.14533	0.119866	0.159409	0.0702443	0.27703	0.199447	1.27111	0.10593	0.0916354	0.107062	0.18279	FFC1_12963	FFUJ_11214	related to ankyrin 3	MAAASHKNFRLRGIPRDCETRSEVCSLIQKTLALEPSASPTVYSLACSPTDPNSKIATLSFPSIPECLSDRTKTEWSFNLSDGNDIDFSRSLAFDTHFTGFTPFHRTNDNDCHIDLVAVCGLGGHALGSFKEKNGRFVWLRDALPSDIPNARILTYGYDTKLSKSSAFQNLTDLGRALQIDLEDTYDPNQPRSILFIGHSLGGLVVKEAVRLLQEEPLGRDFPILNAVCGFAFFGVPHRGLEVKCLIPLVKDNPNRALLESLNKNSSLLDHLQNDFSKISKARGLSVVSFYETEKSPTAVWINGKWDMSGPSEVLVEVFSATCGCQKQHPINRNHSEMVKYSGVHDQLYRRVLIALRPIIGISRGRPGIGGIREGPQACVQFSGDEQECLKSLSFPEQE…	related to ankyrin 3
XLOC_013799	18.6009	58.5673	76.7112	232.189	64.6741	55.7645	53.634	38.7151	3.3258	2.49119	29.8304	117.371	19.9549	21.6464	5.62089	18.3658	FFC1_12955	FFUJ_11222	uncharacterized protein FFUJ_11222	MRSQHHCFVNVPIPRHIPHQTVLDYIQTYEPVLRHNPGMRSWEKSDLDYALVANDRFFDSSDPGQSLCCYQAYEVMRLGPGVQRDLKWPIIFQRVPNGIVSRTDAPAGVISWTQWYVRPRPSEAAADSVSTPSTATPSSSEDDNWEVYGIVTIEAHRMLMPWVATKSESYQVVIGQGMVDDACSKFSSGEIS	uncharacterized protein FFB14_11372
XLOC_013318	1.21539	4.40156	8.037	25.509	2.50876	2.73163	2.54039	2.88146	0.437803	1.08899	2.06278	4.3704	2.33599	2.98445	1.76995	0.987229	FFC1_12954	FFUJ_11223	uncharacterized protein FFUJ_11223	MRSHTFAAHFLAAASSTAFLITDEGVRCRSGPTTSHAIQTHFVKGTDVTITCQTEGTYIGGSTLWDKTTFGCYVSDYYVATGSSGYVTSKCRSCRPPKSNAATVNLIASFEGFRPDVYSDPTGNPTVGYGHLCDAPQCSEVKYPIPLSVANGKKLLVDDMKDFEVCLTAMLNSKAKLNRNQYGALISWAFNMGCGNAQSSTLVGRLNNGEDPNTVISQELPHWVYASGQRLPGLVRRRNAEIELAQKPTRRRALPKRC	lysozyme
XLOC_013317	0.0796672	0.0872583	0.480989	1.41179	0.0594413	0.0165478	0.121107	0.098287	0.0832942	0.0822628	0.210501	0.214562	0.0672002	0.0347966	0.0598243	0.037207	FFC1_12953	FFUJ_11224	related to allantoate permease	MASDREDKTSFPARDPDAKMGETLSLQGSMQVAEEGVENHYRGKKVLRRIDLCLMPLLLVSYTLQFLDKQSLNFASIMGIIDDLDLVGSRYSWCSSAFYFGYLAFSYPASWLMVRLPLGKYLAGSSLAWAIILCCHAAVQTFPGLLVARFFLGVAEASISPGFSLITGMWYKREEQPFRHGIWFLGNAIATSFGGLLAYGIAHIGGALESWRWLFIIFGLITLAWAIVLAIFLPDTPDNARFLDQQQRIDAVDRIRSNQTGMKNNSFKWEQVREVIKDPNVLLLMVFQIAFSIPNGAHTTFSSIVMAGFGFSRFQVYLLNMPMGAILAFFALGSTYLCSRFNGYRTIIGACLSLISLAGSLLVRYGPNQGSRLFGLWIFVAFAAGFPISLSMVASNVAG…	related to allantoate permease
XLOC_013171	1.79495	2.06941	4.29722	7.50847	8.83996	9.73781	7.97012	6.82407	0.421111	0.227834	2.07422	2.62779	1.46758	2.37362	3.26413	3.5231	FFC1_12691	FFUJ_11483	related to quinate transport protein	MTIHGMFRRIVRNDAIHVDPPEIYNWRVIALTASACFAGALFGVDAGIIGGVLAMPDFKREFGLDTRPKEDAADLAGNLVTTMQAGAIAGALLSSPFADRKGRKSALLLVAVTGFVGGIMQAFSYGHLSVFYIGRFVEGLGLGAGTMLAPTYVSENSPRAIRGFLVGFFQLLLVLGGMTAYFINYGSLLHLPGKATWMVPLGCQSICPALLFFSMLFCPESPRWLASRDQWEKAGAVLSDVRKLPVDHAYIQQELLELKTQIDQEREIMQDTGFWAIQKECWTLPWNRKRALLTVAIVTLGQWTGTGAINYYAPTIFSGLGLSSTTTALFAQGIYGVVKVVTCLIFIFFLADSLGRRKSFMFGGAIQAFCMFFVGFYLRFGPEPGEGDHPPPAGIAALA…	related to quinate transport protein
XLOC_013662	0.151076	0.143094	1.38303	2.83861	0.038191	0.0146441	0.0197782	0.220015	0.178929	0.0980725	0.894436	1.10949	0.0652069	0	0.0665551	0.326831	FFC1_12689	FFUJ_11485	uncharacterized protein FFUJ_11485	MGELSQPPNGHVKSSISWQTAHLKTRPKHFSTDILIAGGGLGGVAAALGALRRGRHVFLTEEYDWLGGQLTSQAVPPDEHTWVEQFGVTRSYRALRDGIRQYYRDHYPLTEEARRRAQLNPGAGHVSKLCHEPRVAVAVIEAMLMPFIGSGLLTVRKRVKTVSCDMVGQVVRSVEFRKLDGGGTFTVEAKYVVDATELGDLLPITKTPYVTGFESRKDTGEPSAPEEAQPQNSQAVSICFAVDHIEGEDHTIPKPERYDHWRSCHPDFWGAPLLGLKAPHPRTLEIVEREFTPNPNDDPASVISDQRKSGGDMNLWTFRRIAAKDNFIPGAYRSDICLVNWPMIDYFEKPIIDVSEDELQERLAEAASLSYSMLYYLQTDCSRADGKGTGYPGLRLRGD…	uncharacterized protein FFUJ_11485
XLOC_013081	0.26086	0.237206	0.736632	1.12649	0.019876	0	0.0401224	0	0.0201634	0.115792	0.584267	0.365009	0.0344263	0	0.0348472	0	FFC1_12544	FFUJ_11618	related to flavin-containing monooxygenase	MPPNIRRVAVIGAGPAGAIATDALVKEGAFDTIRVFDRRSAVGGTWIHTPHLPPGIPSLERLVNGEADKEVTVPEDLPAVTAISEAVNSHQHRFSDTPIHENLHSNIAPDIMSYTQEPFPKKLSQKTLDEYGPDSLFRHHSVVREWIEGIFSRAGHEKLLELETTVERVEKQNGEWVLTLRKVLKGRNYWWIETFDAVIVASGHYNVPWFPEVEGLLEFDRRFPGMIQHSKHFREGSKYRGKRVIVVGASVSSIEIIHEILDVADGQVYASIRDQPIPAFGWVPFQHPKIAIKPAIQRFDPETGRVHFTDGSYLDNIDHIIYGTGYTFSFPFIPAVQKRVKNSYRRLPGVYQHTWNIEDPTLTFVGMLGGGFTFRAYEWQSVAIARFFAGRAKALPSIP…	related to flavin-containing monooxygenase
XLOC_013067	1.32158	1.41771	2.50031	5.02452	0.119028	0	0.0381314	0.252847	0.439738	0.660709	1.10231	2.00462	0.13747	0	0.0681938	0.104163	FFC1_12502	FFUJ_11660	related to SPS19-peroxisomal 2,4-dienoyl-CoA reductase	MSRFSPQLTGAHALVTGGTKGIGRVIVETLLSEGVSVSYCSRNVRGDEFATFKDATSGARAVGNSVDISNAASIQGWVKASAEDFGRIDLVVANACPKYVSPSIEDWEKSFHADVLGLVHLINASEPHLEKRNGTGSIVVISSLAGFEARHPAIRGPYTTLKRAQATLAKDFGRWLGPKGIRINTIVPGTIDSPPVDKPDGTVELSQFQQIMTANPDFLKSLIDSIPLGTIGQAQDIANAVVFLGSSLGKYVNGVNLIVDGGMSTAL	related to SPS19-peroxisomal 2,4-dienoyl-CoA reductase
XLOC_013048	0.348104	0.299465	0.955396	1.56406	0	0	0	0	0.0960852	0.142729	0.847881	1.11439	0	0	0	0	FFC1_12469	FFUJ_11693	related to putative tartrate transporter	MATTTDRKREAPEFAHVNSILEDEKPSQVEERDWTGTAKKTDPEEIRLVKKLDLWIMPCLCVMYFLNYVDRNAIAQARLNNLEEDLNMTGTEFNTTVSILFVGYVLMQVPSNMLITKVKPGIYMSAWMLVWAAVSACTALVKNYGGLVACRFFLGITEAPFYPGATYMLSIFYTRKEVAARIAVLYCAQILATGFSGLIAAGIFAGLDGKAGLAGWRWLFIIEGAATALVAIVGFFMLPNTPLTTRWLNEREKQLAHERMEKDKAYDSEEGGSAWEGLKQACADKRTWLFCLMQNFHLSACSFNSFFPTVIKTLGFNTTITLVMTCPPFIFAGAAGILFGWNSGRMHERTWHITAGLSIAVAGFVLAACTLNTAARYVACFIFPMGAYAVNSVIIGWAS…	related to putative tartrate transporter
XLOC_006340	0.14667	0.300666	0.268091	0.799112	2.75403	3.04749	2.96604	3.32042	0.0198197	0.146771	0.103074	0.122956	1.17786	1.96353	1.77273	1.38707	FFC1_06659	FFUJ_12982	related to SAM-dependent methyltransferases	MSTLALPSSSLPPLFTLPQRSEADIFNALHYLAAIYCPLSFPFSKELGDVKHAFAEVDSGYTSGNEDDEGELTPATIRADVHEKSFSERWLTGLISRVESLEIFSSEEASQRALDQAAYIFESLFASALDEDDQNSPFLREFSFEANVPGVEKKQISVQLNDGLAGTNDTDFEDVGLQSWGASIVFSNLMCTDPERFGLTDLDPSEHNRIIELGAGTGLVSLVLGKLIPALGINDSKIIATDYHPAVLSNLESNISINYPSTSPVQASPLDWADFSNIAPFDIPANMLFATDVVYAPEHARWLRDCATRLLSDDGVFWLLVTIRPNGKFAGIGDTVEAAFAERDRLRGKNGRRLDILERQKLDKRSGVGRGDESHYELFRIGWA	related to SAM-dependent methyltransferases
XLOC_006006	27.1087	55.8403	93.6877	182.032	14.3837	12.7219	15.0087	26.0303	2.88516	7.74738	35.7653	95.4587	2.67847	5.0179	4.29434	3.1396	FFC1_06040	FFUJ_13569	related to subtilisin-like serine protease	MKSYNLLKVLLVAASVAVDVKAVNKPAVRSSRIGRASAGNTRKFIVEVEPMEGVVNVWQAHKVAMPKVEFSESGPSSSIRNYSIHHWTGVDKLHAAGIRGKGSTVAIIDTGIDYTHKALGGCFGPGCKVKGGYDLVGADWETHNERMHPKQPDNDPMDYQGHGTHVAGIIAAKNEWLTGVAPEAELLIYKVFSDDPWETDEETIMQALCDAYNAGVSTIMHKYVLLLTGNLKADVITSSIGQPNGWSDNPWAMLASRLVDKGVVVIASAGNEGEFGPFYSSSGAVGRGVLAVAAANVTTKPNANRTGEDLGPLPVYFTTWGPTNELLLKPDITAPGYMIMSTVLNQSYEELSGTSMSAPYIAGIAALFVGQYGGRAFNGAGFAKMLRDRIASSGTTLPF…	related to subtilisin-like serine protease
XLOC_006767	1.66152	1.4497	3.41502	6.06889	0.383532	0.0795567	0.205711	1.25839	0.651081	0.293766	1.56593	2.50111	0.424722	0.167291	0.17573	1.73148	FFC1_05896	FFUJ_13706	uncharacterized protein FFUJ_13706	MQANTLEAPAVGPALREPVCWQLTLSASYEVSIEFVLTCTASSESVANLFLTLRTIKYQLELHNDRYLLPRYTHAYSDLRHFTSLLAPNGASAMYGSRGPVEW	uncharacterized protein FFUJ_13706
XLOC_004005	0.0460566	0	0.553829	0.853229	0	0.131509	0.0401968	0.119817	0.0410599	0	0.211275	0.459337	0	0.0447604	0.135265	0.0372177	FFC1_03762	FFUJ_14275	uncharacterized protein FFUJ_14275	MGPFTSVTVFVAWCHWACIAAAQAEFPSCASNCYTGLVSSSSSPTTNCNSFDYKCICQDEDYLEEQICCLHKECSDGDREAAEGYARSVCQAVGVTLGHNLTCSTLSASASSTATEVSGGSTKTDTADSSASLDLSSGNSGSGDESSKTHIAHQTSQHRIKTGLGAGLGAGIPILGAIIGAITWYLKRKKRQSLTQTPQANATAQPPFDPAAPTQEVQYVHEAPGTSFYPMPQTHTQTTAHPQQPVFEAYGSPVNNGEGLNSVTKLPTAHELPVGRT	#N/A
XLOC_003125	0	0.0688708	0.187081	0.638169	0	0	0	0.0300433	0.0471182	0.1228	0.129211	0.118337	0	0	0	0.0505493	FFC1_03654	FFUJ_14378	uncharacterized protein FFUJ_14378	MASNRPDSCSRFSSLNRTKPSSQNPYEENDRESLSEPFSPTGLLGEKYDLLKRQMEARSQMTKPNDSPFKRGLLGSLAESEGRGYRASYDTNRAPRGLSRSASTASSSNRCGPRRTPNVSSVRTDSIYCAQSGITPPPLLDISPTLPQQRASQRDRNSQSFRSPTGWPPLSLPETPNTQWSSPHLSSLGRSHSVAVRSSSGSWGPSGSGSSSHTTPMSSTPSRRVSTATAPARAETWYQGDQAEPKRRGTLRRC	uncharacterized protein FFC1_03654
XLOC_003123	0.180837	0.162738	0.88754	1.35772	0	0	0	0	0.172732	0.119091	0.457162	0.761902	0	0	0	0	FFC1_03652	FFUJ_14380	uncharacterized protein FFUJ_14380	MPAFPFNDLPTEMRKKIVLHALPCVTVPFRYLHSNIARVHDHHEEQAFKALQESTGEIASLSNQIRCLEAIRDNGTLIMSSIGGVPFRMDPIHDTFQAVDMRLPAVRPSASWNPENVSGQHRHALPVENVLGVSRTVWLPRGQAPPEDDHSDSSSHVSDEAGPSDFPPPATYYDMPLEKNLPIFSRLPKAKNLALIIENAGREWSIEGFQMFGPDVIGPRFHGNDWGMRRAGDHSLEAQNHFLSRGIQADTRTQWNFKNGWDYLSSPEDASQYPPTDSRFSLPNIGFYGYSRGNVSLGGHWAGFRLWLAEKKVEFSPLSWWEVEPLIGDYFSIEERGYHTCHPGFVARVWVIRSEKDLAPTQRPHHHWEEVREAEIGDPASVEQISTTWKMVRDMLSRV…	uncharacterized protein Y057_11858
XLOC_006661	85.4077	201.356	223.342	477.151	0.215602	0.627071	0.956072	1.5431	24.4079	34.1975	55.1778	212.893	0.213215	0.608838	0.994534	1.62272	FFC1_05682	FFUJ_14685	related to integral membrane protein PTH11	MTALAGQIAEIWILYVIGTAMIGARIFCRTKMVGYRNYDWDDYLVIAVAGMWTAAPVIGQVFVQGAEGRHTSDLTFEERKNMSEEDRKKWAYGSQMFLLGLTGYVVILWTLKFNMLCFYSRVVRGLWTERFVKPLMVVVILSVVVIIITLAATCRPFHHLWQVWPDPGRQCVPQNLTFFVVILVFNLVTDICIMLIPIPVLVGIQTNRLKKFGLILLFSLGFFCMFAAILRFVLIFNASVSALWSMREDCVGIFVGQAPMVTPLLKRRFWVMAGYATDKTGNSQTPHYNGSRLESHELRSGRANNSKVHDPYSITNVVSRSESQEEIVQKDLPSLPEQPRQFRSGIRVEQRIDVEAVQGTYTQPRDPRW	related to integral membrane protein PTH11
XLOC_006643	2.49077	6.11824	3.87632	9.58515	0.207837	0	0.0654582	0.263874	0.876947	4.27036	1.72233	5.5563	0.234966	0	0.113377	0.319797	FFC1_05644	FFUJ_14722	uncharacterized protein FFUJ_14722	MNTTFDCAGSPVRILKSKNFQDLHPQATDKQPLSTLSLHALLLELITMVNPLYVVYALSAIAGVEACKRTCSASNDAGTTCSYSCTQVCSSISAKQARDTFLAALQSGGNSCSAVGTSGVSCRKTAKFGSCYDHHWSCGSGC	uncharacterized protein FFUJ_14722
XLOC_004945	0.0224164	0.0198525	0.051628	0.369121	0.048434	0.0931017	0.0467206	0.134174	0.0271	0.0187385	0.0361064	0.218571	0.0292373	0.0409774	0.043038	0.140649	FFC1_04019	#N/A	#N/A	#N/A	uncharacterized protein FFNC_14646

## Sheet: Fast repression
Probe	WT_0	WT_15	WT_60	WT_240	WC_0	WC_15	WC_60	WC_240	WT_0_desv	WT_15_desv	WT_60_desv	WT_240_desv	WC_0_desv	WC_15_desv	WC_60_desv	WC_240_desv	Feature	IMI	Protein name	Seq	Description
XLOC_000043	1.86933	0.805539	0.349972	0.454425	1.0819	1.40753	1.02174	0.719228	0.972308	0.369254	0.0948564	0.490478	0.649484	0.782572	0.805898	0.953524	FFC1_00092	FFUJ_00059	probable amino acid aldolase or racemase	MYSPKVGDSLDSLDTPSMIVDLDVMEANITKLMDRLLPTGRNIRPHLKTSKSAIVAKKLVAAGAKGGCVAKLSEAEAIVAAGFADLLITCEIVGPAKVKRLVELFRKHREIRIVVDDQRAATTINDALEKSGIEDPISVLIDLDVGLHRTGTQPEGALPLAKHISSLKHMRLIGVQGYEGHLQHLPDFEDRKKQCLESMRILIETAQALKNEGFNIQVVTTGGTGTADFCATVPGVTELQPGSFIFMDTDYRNAIGTYYSHSLSFLATVVSKQGERQVTIDTGLKSLTTDSGLAECKDQRYSYFQLGDEHGALTWEDGTPALDVGDRVEMIPSHIDPTVNLHDFYYAYRNGIIEEIWPVDSRGKVQ	probable amino acid aldolase or racemase
XLOC_001274	5.84506	4.18304	1.99725	1.21539	0	0.0116698	0	0	0.495112	1.17991	1.61269	1.39839	0	0	0.0265188	0	FFC1_00114	FFUJ_00081	related to tenascin X precursor	MTKLNFPAILLAIFVTASYAQEVPSQQPLPDPVENLPQSHTIKRSCNAACVQVSLDDITPSLDSKGHVKCCPVGTTFDGTTCVSKPTTVCPPNTTLQAGACVSDQKPSCPAGTVLQDEKCVSIIEPGCLSGARFDSGNCISIQPPSCGPGFDFNGVSCISTQPLVCPAGYTVVGSLSMTLEDGLCVKKQTPVCAAGFVFNEDSKSCSHLEKPTCPSGSTFSGRVCISDKLPKCKEGEYKGGVCQSSEGPECVPGATAIDSTCAMPFFCQDGLVKSRDPKTGGENCCPEGMGWNEAKRLCLRPATDSTACPNGSSFNAGECASTPQDIDCPPGFTFNGRVCAHFQAPSCSENTSLSNNTCIFTDKPTCDEGTFNGSACVTSQTPSCSGESILSGESCVST…	related to tenascin X precursor
XLOC_000054	10.1888	6.86579	3.65525	1.71214	0	0.103418	0.0657335	0	2.56875	2.50461	1.04172	0.647165	0	0.0955173	0.165898	0	FFC1_00115	FFUJ_00082	uncharacterized protein FFUJ_00082	MLCPSFAIFLASLAAVLAPVTAQSCNTTGTYEACCPSSDGKVLIFQDKDYRVRCSYSHVFGGVDSPNRPMNLTSCVQKCSGKTGCLNPQWQSRGQSSTEGLCYVSELKSDAASGRGPGTKNVAFVSVDTSEKAKDPDQCRDEVSKCNTDCDEKIRKALKDKIPISDCDRKVFEAGKGKIPISDCDRKVEEAGKGKISNKACKDKIAEAIRENEEKWTKRLNKLKNKPPRYPRFACIKGVRTFYEHSYNYHCQLDLHQRPKDMSKQNDKVIDDADCARRCNRSKGCKWAFYDPHTSRCWWSKTPYNPRYTSEGNLGGAVLERV	uncharacterized protein FFC1_00115
XLOC_001319	0.876371	0.238623	0	0	0	0	0	0	0.242227	0.170193	0	0	0	0	0	0	FFC1_00219	FFUJ_00182	uncharacterized protein FFUJ_00182	MDWDQSQISQAIRHLDFNLSTKWDHAFKLFADAQRVEIQRYLQAGSSNLEHVVRKTLQEYVTGGRIIIQSPYSPEEPSKSPSAGPPKQQLAAESDQHDEVERLSLKLQKTEEELTAAKSQLEEAEIRTDQLRKLIIPVGTEPILDSKIQQLFFEIRTLTQKVVSRLYTKAPRYWESSIDESRVFFKGIQDLPPGLQQDAIHSELFTCLRRWLFSNEIKECGLGEGHENLQSLLGQTEEALFEAVGAKYPGERHREEIQEWRSATFKCTELLQDTSNDPAYYAANLAGCFKPAETDDLKAQQRGRKNLQTLCERSLELGALMRRTEDSFEVFAVKDGTHLVECEDIVEKWRNYSEEGASGVEITVWCLFGGLRKISKEYPTKPVVLEKARVATRFVRRAE	Uncharacterized protein Y057_8670
XLOC_000112	0.608706	0.322921	0	0.0272422	0.0173766	0	0.0564379	0.0256936	0.219321	0.320141	0	0.0478677	0	0	0.0949587	0.0648461	FFC1_00220	FFUJ_00183	related to hsp70 protein	MALRFTNSAKPSGSNSSTNEDKITSLGTSALSSKERIIIALDFGTTYSGVAYCFGSSSEAKPVVDWLGLEGRTQPKVPTAIAYDPDDSSEFKWGGQLSWRDDHVQGVKLLLDPKQTRPSYLPSANVKSEMKKLPKSAVDVAADFIGAMYNHALERIGSRVPRDYLDLCEKTFVLSFPAVWSERAKESTIQAAKKAGVYPVMLIKEPEAAALYTFKTQERALSVGDCFVVCDAGGGTVDLISYEVVATEPTLDLAEAVPGSGNMSGSLGLNKRFAEAVKNLIGEEEWLCLKNTSAWAKAEHQFDQEIKTAFAGDLDEEYVVNFPGAHLPDDEDEGLRRDSWFIETVQEIFEPLIADIVRLVREQVQSAMLERPDQPVKGIFLVGGFGASQYLKARLEESN…	related to hsp70 protein
XLOC_000141	1.14701	0.481477	0.166005	0.0708783	0.226388	0.482388	0.52467	0.450086	0.407548	0.28961	0.0118676	0.0716745	0.197454	0.648528	0.700074	0.757291	FFC1_00267	FFUJ_00225	probable unsaturated glucuronyl hydrolase involved in regulation of bacterial surface properties, and related proteins	MPSHVHDIASQDVHKQIQQLIHELVNIKDTTGEFLMTLADGRIIDTKGWNDWEWTHGIGLYGIWKYYEMTGEDQWLKIIEDWFQARFAEGHKGKNINTMAVFLTLAYVYEKTQNPTYLPWLDAWAEWAMHDLPRTKYGGFQHITYLEVNEQQLWDDTLMMTVMPLAKIGLVLNRPEYVAEAKKQFLLHIQYLFDTKTGLFFHGWTFKDGGHNFADARWARGNSWVTIVIPEFLELVGIKEDDPIGSHLINTLDSQCAALAKTQRANGLWSTLLDVPESEGSYVEASATAGFAYGILKAERKRYIGKEYSEVAVKAIKAVLENISPEGELLNTSFGTGMGHDLQHYKDIPRTSMPYGQAMAMMALVEFLRAYN	probable unsaturated glucuronyl hydrolase involved in regulation of bacterial surface properties, and related proteins
XLOC_000249	15.5334	4.53541	3.24509	1.9928	19.8105	16.1689	13.5305	10.4001	9.75958	3.04514	0.756679	0.476372	6.95892	3.71773	2.86447	3.91142	FFC1_00456	FFUJ_00414	related to TIM barrel metal-dependent hydrolase	MTSSDLAQRIPPDSWDSHMHIVDVENYTLDASAKYRPTSHSLDQALAFETSVGLRNIVLVQPSIYGLDNSCLLDGLRALGADRGRGVVAIDPEAVKEEELRSWHELGVRGVRLNILSNELAIDAAELERQLMLYANAVRPLGWVVQVYVPMDMVTLLEHIIPKLNVKFCIDHLGQPPLNKYAGADPYDIPGFSSLINLLKNGQTYVKLSAAYRMSTLPDYRDLDLIAKEVIRVAGKTHVVFATDWPHTRFEGLNIKPWMERVLSWCSDDEHLKERLFRGNAEDLWDVQRPSMKADQ	related to TIM barrel metal-dependent hydrolase
XLOC_001548	50.2877	40.2038	14.3779	10.5005	52.7701	73.5139	161.151	88.3215	17.0966	8.24967	5.29545	4.42661	25.5787	56.7222	207.329	127.017	FFC1_00692	FFUJ_00634	probable aldehyde dehydrogenase	MAPLTVELSTPVTGTYQQPIGLFIDGKWTEGVDKQKFEVINPSTEEVITSVCEGTEKDIDLAVTAARKAFDGEWKNTSPQARGNYLLKLADLAEKNLDLLAAVESLDNGKSITNARGDVGAVVGCLRYYGGWADKIEGKTIDIAPDMFHYTRSEPIGVCGQIIPWNFPLLMLAWKIGPALATGNTIVMKTAEQTPLSALVFTQFIEQAGFPAGVFNLVSGFGKTAGAALSAHMDVDKIAFTGSTVIGRQIMKSAASSNLKKVTLELGGKSPNIVFDDADIEEAINWVNFGIYYNHGQCCCAGTRIFVQEGIYDKFLAAFKKRAEENKVGDPFNEETFQGPQVSQLQYDRIMGYIKAGKDEGATVETGGERLGTKGYFIKPTIFSNVRPDMKIMQEEIFG…	aldehyde dehydrogenase
XLOC_000514	3.08316	1.95849	1.20837	0.51	0.727294	0.516865	0.535494	0.415117	0.917517	0.900181	0.362286	0.204594	0.274691	0.515786	0.372358	0.228396	FFC1_00931	FFUJ_00862	uncharacterized protein FFUJ_00862	MYSKSDEHDTLGDLPLHRPDSTQQATTKNLPHIMLENWPTQTPTWRHHCYVVYTVDFRVRSQRARGDPSLTNRADRTHDHIESGLFVQTHAKRMCGHLYMPRKHPIYEYYVLQSQRLDNIRQHEYFESDAAIGFIFKKDYQNSFYQILREIQLPEKKNPEDSALYRRHDINVQPFPPENSTD	uncharacterized protein FFUJ_00862
XLOC_001820	78.4368	27.9681	13.7632	13.6203	27.7871	16.8373	14.3228	11.9701	23.1441	11.4835	5.48399	2.03337	22.5067	10.9183	11.6084	6.30385	FFC1_01196	FFUJ_01118	probable ASP3-1-L-asparaginase II	MPSFKRLHGRALVATAPVYCSGPAASSTIKMTPSTASWTTYLWRIILSVLAPSTALLQFGSWAASVLGPPVHELYLQPHFSALQKAPIQTGIPFEISTTPEFNCFSPNLPNITIYATGGTIAGSASSADQTTGYQSAALSVQSLIDAVPQLCNVANVRGVQFANTDSIDMSSDMLQALAEQIQADLDNPSTQGAVVTHGTDTLDESAFFLDLTIQSDKPVVVTGSMRPATAISADGPMNLLSSVTLAANENARGRGVMIAINDRIGSARFTTKVNANHLDAFQAPDSGLLGTFVNIQPVFFYPPSRPLGHHHFKLPSRPPSAAALPQVDILYAYQELSVGMFKAAVDLGARGIVLAGLGAGFWTSKGTEEIRRIVRETKIPVIVSRRPEGGFVGPCQAG…	probable ASP3-1-L-asparaginase II
XLOC_001922	397.926	307.564	148.44	85.1473	51.5644	45.1807	50.9325	32.1495	153.344	108.594	97.8428	29.9754	26.2958	18.0975	10.5867	14.8631	FFC1_01396	FFUJ_01309	related to verprolin	MADTQNRYYPLDSSLARKHRGRLNPIIEEDSDDGMVQNGGRRTRRAGNAQLKIEAWLTPMSDHFPTPRGMNYLSAPILPSSPSTDSAADTSPTTSSNPWNRHSVATEATEFEDLYDVTDDEEDMLKRKASARSRQVPTKQPTPLVIPATRDNSVETWSAVDNMKKSMTSPVPLTPSVKLTMSPAQMEFMHEQHAAETPTMSAPPSLDGSLTSEQLAAMSAPPTPIIGNEDSNTEDAWAGVQLQPGALATLHALASGEENLHEQPSQVLEVPEQHSVQPTVEMRQQPLRLITSFQSQPAINRAFSPNPNRQSLADLTKLDIPSPGGFFSGLSPRSRNTWHMPSKSPEDMPPPTSTTAEQFYRCPWNMDASVPPVPKRKELVEDFYRSVRFTPAPTGPIVE…	related to verprolin
XLOC_002299	1.21979	0.787735	0.261398	0.251216	0.0154365	0.0138358	0	0.00588358	0.255913	0.397523	0.175332	0.0685643	0.0136136	0.0131718	0.0144964	0.0098994	FFC1_02106	FFUJ_01978	related to TOB3 (member of AAA-ATPase family)	MPSPPDLEVLAGSNRSHTSSAPSGASDESTSWSKAIAEVPQDSEKPLPSQIQMVPGTATSPDETCDMQAEIKPLKHQVQDSKERYQEEQEEFGDVLDNGLEFGGWRTREVEPPESPSTRSHQVYFGDKTDQAISVQLKPVDTLYYERARMPPRIRQYFQVPQFESKSITPMLNRVPWAKFQGPLEVTRQTNKFAIDVLVGEPEVKVILPGLRYRNKFETARHGFETKVDTSEAAVNASSAKVSLNLRKPTGKLMSRGQGPLPERIRINSSIILRSLSKIFQEDDVNDFEPILMMRPFRSLVWYKDEIRKERDELEEHLIRAQKKYEKAQDKDKAKESADKDGNPTGEVVDSKVEPFADQKRQEVIDDKLDGEDKSPQGPIENTFNNNPGTNENMEKAEE…	related to TOB3 (member of AAA-ATPase family)
XLOC_015978	0.375654	0.171843	0.0692302	0.0549414	0	0	0	0	0.156245	0.0663797	0.0142331	0.0501029	0	0	0.0131114	0	FFC1_14850	FFUJ_02125	related to linoleate diol synthase	MNGHSHPSREPVMSKQDEDLMQLTLQLRNKKEAEKYAKYHGDKLIGNPIAPKVGLWEDVKSVFSKSSNWPALKRTADGIIKGTGLDGQSLATIAGSLSDYSVQRQKLIDGQVKDKYDKMLHPPLTYLGDAFQYRTADGKFNSAMNPHLGQAGAPYAKTVPSKTAPLGALPDPSDLFDKLMAREEGGRESQSGLSAMLIYHATIIIHDIFRTNDNDKNISDSSSYLDLSPLYGYTTEMQRKVRDDKFKLGLLKPDTFAEDRLLRQPPGVCIMLVMYNRYHNYAARQLLRINENGRFRVPAMYEKTKLVSLIMEHLPDRDQYGQKLPLDETIRDEVEKMCKKYEDLWRQVRAARPGDAPYAPPKTPSETEKERKKREEAEKARQTALEEIEKFNKSQLNQD…	related to linoleate diol synthase
XLOC_016003	7.8508	4.1448	1.44434	4.15373	4.98945	5.83493	3.42752	3.08429	1.06585	1.56814	0.692773	1.82727	2.80605	1.14363	2.29171	3.3349	FFC1_14900	FFUJ_02180	related to methyltransferase	MSTVEADQVLHPDEQIADDGDSSIGTDATSSTTSISSSILNYRHENGRTYHRYKDGRYHLPNDQVENERLDLQHNLFLLTFGDKLGLAPPNGPTAEVRRVLDLGTGTGIWAIDYADEHPEVEVIGVDLSPIQPAFVPPNARFIIDDIDEDWEYGQPFDYIHSRMMVFSIKDWEINLKPGGYIEIQETGGTILSDDGTLTPDHALSKWCILLEEAFTKLGSASIEFDTIKAIMQEVGFIDVFDKRFKWPTNSWPRDKKYKELGTWNNYNSGNALESLTMASFSRAHGWSREEIITFLIDARKDLNNPSIHAYNPIYSIYGKKPDA	related to methyltransferase
XLOC_016036	1.42001	0.853073	0.15185	0.608475	0.468777	0.626608	0.289681	0.332442	0.196893	0.249201	0.21894	0.425526	0.376898	0.124757	0.125478	0.356571	FFC1_14971	FFUJ_02254	related to chitinase	MVLSIPQVVGRLALVLGLLPNLVLAQCGPDNDGARCPLNVCCSSAGYCGTSSVYCGDGCQSTYGSCSVPTVPSCSSGGKSATNGHRVGYWRVQQAWDRSCDVVLPSQIQTNGLTHLILAFADFDSSSFAVGAQNSQDVDYYKQFTALQTSSLQTWIAIGGGSFSTETWSSMAASASSRSAFISSLKSFMETYSFQGVDLDWEFPATTDAANLVSLVQELRAAFGKDYGISAAVPADWGSIQGFNAAGMGKYVDFFNFMAYDLHGWGIDQEPAKSVVTYQASIVDIANDLMPLWANQTDPSLINLGIPLYGRGYTLSSSSCKEAGCAASGPSEEGSCVKDPTGVMVLSDIKKAVAANQATVELDSEAMQKYVTWGGDQWIGYDDADTLALKMAWADGLCL…	related to chitinase
XLOC_016037	10.8077	4.99003	2.13496	1.95921	0.364758	0.485203	0.315468	0	1.64705	0.816368	1.33709	1.30894	0.254289	0.338094	0.274118	0	FFC1_14973	FFUJ_02256	related to methyltransferase	MSPPARKKRADLGSSGSTSPRVDAESGLLPPEYWSQLPEEESAPGDEDSAVLDNASSTASLTSSILQYRTINGRAYQSERGNPEYWGPIDDTGQEAMDINHHVLTLLLGDKLYLAPVPEDIQTAVDIGTGTGIWAMEFADKFSNASVIGTDLAPIQPGWIPPNLEFQIEDCTQEWTFQPNTFDYIHMRWLVGSIADWKSLFKEAYKCLKPGGYIESYEPSSRVESDDGTVQPGRRPFTIFEENIQREAMREAGFMDIEERDFKNPVGGWPKDPKYRSVGQFMQTAFEQDAQGTVLHMATALGWAEEEITVFTSHFRREIRSPKIHSYFRQKVVWGRKPL	related to methyltransferase
XLOC_008004	13.5832	7.21979	2.09167	3.89327	38.0731	39.6822	30.228	21.4645	1.77081	2.26577	1.42059	1.89529	3.5829	4.01082	7.56554	2.36435	FFC1_06907	FFUJ_02521	related to GNT1 alphaN-acetylglucosamine transferase K. lactis	MTPPFPPSFMASRRYRWAAGLTLAFFVFFILSNNGFLSQKPLEKFHGSIEVDWSRFAYTQYVTNSDYLCNSVMFFESLNRLSSRADRVMMYPSHMFEANNGSSVDTQLLIKARDEYRVKLVPITVQHKDNKDDTWADSYTKLLAFNQTQYSRVLSIDSDSTLLQEMDELFLSPPAPVAMPRAYWLFPEKEILSSQVILIQPSEKEFARIMAKVDSASENDFDMEIVNYLYRESALVLPHRPYDLLTGEFRADNHKRYLGSDTEPWDPAAVYNEAKLVHFSDWPLHKPWIQSDEELRLQSQPNCTTLADGAEDCSARIIWNSFYTDFKRKRKEICGLDEVILSKEEYEE	related to GNT1 alphaN-acetylglucosamine transferase K. lactis
XLOC_008074	3.76261	0.919485	0.730669	0.928466	1.19392	1.13865	1.03856	1.12621	1.00128	0.320561	0.364192	0.236544	0.398298	0.320321	0.466097	0.180377	FFC1_07031	FFUJ_02642	related to exo-alpha-sialidase / neuraminidase	MRGLFLGLSTTALFSSSSFALHFTTESECAALCSDGSNSTTSNPQTSTTNSTDVVCEDNEYSSSGNGIRFKNCLNCLQKSDTTWKEQSDVYWFLYNVRYAFDVCLYSYPDAADSGTINSPCNIESSCGSLEDALTASLLKTTPDNQFDYCEAEDSVIKSSSYNQCIGCLQSTSNQKYLANFLVALKAGCIQEPKKGDILGLSGTIFTHKLINITDPSTNETLPGDGGAPVGSMTTGTIVGIAVGCGLGIAGMVWLIFMYCRRSRQRRGAGIKIESPPPDAPMNDPSMYGIHKSSYFTDNAGYPGRSAQPHDHNGNHIRTMSNAEYYDSFEQDGSGINGKVSYHYAPHSKSNGPNAALPAHPAYIPRVVSRLPDAKAPSSLRHTMRSNVPDSYALQTYLS…	related to exo-alpha-sialidase / neuraminidase
XLOC_007372	505.352	224.807	73.3716	214.336	1769.69	2646.19	1920.35	1515.08	203.679	55.8709	50.7379	110.527	227.665	1129.07	690.465	580.038	FFC1_07059	FFUJ_02669	probable glutamate dehydrogenase (NADP+)	MSHLPQEPEFEQAYGELASALENSSLFNEHPEYRTALAVAAIPERVIQFRVVWNDDKGNLQVNRGYRVQFNGALGPYKGGLRFHPSVNLSILKFLGFEQIFKNALTGLNMGGGKGGADFDPKGKSDAEIRRFCQAFMTELSKHIGAETDVPAGDIGVGGREIGYLFGAYRKLRNRWEGVLTGKGLSWGGSLIRPEATGYGLVYYVEYMLKHANRGTFEGKRVALSGSGNVAQYAALKIIELGGSVVSLSDSKGALVAKEGSSFTPEQIHNIAALKIKHQALTTFEHDGQFTWIEGARPWVHVGKVDIALPSATQNEVSKEEAQALVDAGAFIVAEGSNMGCTAEAIDVFEAHRKEKGAEALWYAPGKASNCGGVAVSGLEMAQNSQRIQWTEKEVDDRL…	NADP-specific glutamate dehydrogenase
XLOC_007429	11.2274	6.2882	2.03851	1.72203	8.93982	3.7827	4.70991	4.50275	7.8779	2.3298	0.573046	0.623143	4.29782	1.47236	2.20802	3.21822	FFC1_07172	FFUJ_02770	related to triacylglycerol lipase II precursor	MVHNWCSCVLNSASTELDAGLVLRTQKARLNLCSPKEHNVDKPAAKDNTDQTPSPQPSNNPDNNSDDNDNNKDKGKSSDDDKEEPAKKREGPFVDLGYSKYQGNVLESNIHEYLGIRYAKAPTGDLRWKAPEEPESTIGTLKAQEYAPYCPGVNDGLSSRIDEDCLFTNIWTPANATSDSKLPVIVFFQSGGYIRNASPYVNGTQLISASNNNIIFVNFNYRVGMLGFLASKEVKENGDLNAGLMDQRFLLKWIQKHIEEFGGDPEHVILHGESAGAGSVALQLVAYGGKDDGLFAGAIAESTFMPGLPSPDDLQYQYDRVVNATDCADADDTLKCLRGIKSADLQSHNAKAPFDGRTYRSYFYWAPTTDGDMFPDLPSKLYEKGEFVRVPLLSGSCTN…	related to triacylglycerol lipase II precursor
XLOC_007778	2.51481	0.801014	0.540558	0.212511	0.0404144	0.14651	0.0780044	0	1.24799	0.844816	0.665351	0.185774	0.0700002	0.168199	0.135108	0	FFC1_07815	FFUJ_03383	uncharacterized protein FFUJ_03383	MARYFGQASPTELRDLERNAVNANDEQMATAAAMLQKAFDVLATDVRQVRAILTPYTWAIISYYEIMGSIQERMFVDIGENGQLVGVDVVLSGQLGTPILGEEDSLELITPQFQTPQGNEVPVIFLTWQVEGKLKTWISRKKRSDYLDLVFLFREYGNEIRNWSEHLSKDWRREFYETLAIWARYHVLGDVEEGKVEGEDMTVAESIEQDAVGYKYHDREYFTKASSSYMEHKNSADGH	uncharacterized protein Y057_7134
XLOC_007825	0.609447	0.285248	0	0.136252	0.300464	1.09035	0.30028	0.424759	0.948311	0.382256	0.0243215	0.194609	0.224162	1.619	0.505231	0.73932	FFC1_07894	FFUJ_03458	related to GABA permease	MNNAEKGVSEKGSDHEQAKNYDHAVGDAGDAADLTALGYKPELKRNRSMFTLLFQSLAIAAIPYGFGAPLINSVYGGGQLTMFLGWIIVCILDECIAISLGELAARWPTSAGPYYWSFQIASPKYRTVLSFITGWTWLVGNWTITLSVNFGFASLLAGGISIFLPDYDWQPWKLVLIFYGLCVFTFFIVAFGNKFLPTVDTFCAAFTAITIFVVCVCLSTKADKGRHSASYTLGNFDPNLSGWGNFGFWIGALPSAYTFSAIGMITSMAEECGDVTVKLPRALALCVPVGGIAGLFFIIPICATLPPLEELLAAPLGQVLPMIFYQVMGSQAGGIALTALVLIITLFCSISITVAASRTTWAFARDEAIPLSRVWSKVSKRHETPIMALLLTTIIEMLL…	related to GABA permease
XLOC_008657	7.11838	2.31004	1.15682	1.79108	18.9018	15.0711	11.2342	12.1754	0.30417	0.590252	0.577244	0.879064	4.29217	3.51476	2.86824	2.8983	FFC1_08097	FFUJ_03657	uncharacterized protein FFUJ_03657	MQRLKKFLSKRHSTHGPGISAPEPTPANPPTSSSTDTRTFSRGSIDLSRIERLPFEIRNEILLAVDSIADLSSLLHASPTFHQQFRLDRAFWLWHCLKQEVGNVIIDAYNVNNLKTPEFQSTRTRQKVLLYVEDYKQQRSEGIESLAQPPEDYVIRIVSFHTSVIRALMHQYAAWARANLEGLAEPQELSRTEATRIVRGLYRFQIFCSLFGPARGGYNYYFYEDRIMNAGQRLQQLDDLYEAWEIEEILCINAFVHAKYRPLFEQVEWDLNPDNPSFDDKRTGPHTPPGAFHLSSRMFGDYYRNGIVCRGLPVLFAALKIPSHVELVKLIADNVVSVADDMISETTRPYHQDIRRDNHYSDRDKAQDNRDRMCFEGESYDSPPFAWVAFWKESYSNLY…	uncharacterized protein FFC1_08097
XLOC_009949	4.43417	3.34804	0.883438	0.901856	30.8263	20.0667	16.4527	5.29494	1.53807	2.27063	0.686155	0.649065	19.3481	14.0145	21.0179	3.83395	FFC1_09497	FFUJ_04021	probable SIT1-Transporter of the bacterial siderophore ferrioxamine B	MDKTTGTIELDQKDDLSSPTTSQADPKLPGVLRVEAAASKLTTPKRWIFFTSIFFFSYALNLDFQTRNTYVPYATSSFGNHSLLATVIVIREVVASAIQPSVARLTDVFGRIEIFTLAVVFSLVGTIIQTYSANIQTFAGGAVLHSLGYRISILTIEIMIADFTSMKTRLFFAFVPNWPALVNIWISGDITSAILSVTSWKWGIGIFAIINPICALPLIIFMFVLGRQTKRSRLEQETLGSSSWTASLKAIFWELDVVGVLLLTAALAMTLIPLTLAGGQSAKWRDASILTPLIIGLILFPIFAIWERKVSHPMLPIHLLKHRTVWGCLGISAIFPIAFMVIGSYLFSLLVVSYNFTVKDATRVALLYQFCAIIVGSLLGPIIIKIRRLKEVILTGIAL…	probable SIT1-Transporter of the bacterial siderophore ferrioxamine B
XLOC_009957	1.57455	0.496915	0.289152	0.642631	2.58636	1.82197	1.34799	1.0322	0.413747	0.133245	0.0525896	0.329753	0.691253	0.580169	0.321462	0.594544	FFC1_09520	FFUJ_04044	related to transcription activator protein acu-15	MSSHHSPYDNIETASHSTLGHSEPQGQKRKHSTSQPGREYGLMRDTGEHDAARFVGSGSGIHYIRAVHLRLAKRSASRTTEPGPSTINTLIPGEDDQLRQDASIRRNREQFLWKDDEVCENSMAAEETFEDFVEWSKSYFEAWHPVLPFLHGPHVLGLFEEVAKNGTLLLNPIDMVILKSVLSISLADSRQATPLKKPIPKVYLFNSVDDALASSQFALSQPASIRSTQAALAIQLFLTSMLCLNAASRLGGLIVRTAFHMGLHRCPARYPFFTDKEVSVRRRVFWCIYTLERLLCQSLGLPLDIRDDDLDVCYPGDERHTITNREENPERLQLLTFVAKHARIRGLILELRNKSMLQRQDTADRAAFVQAELAKWFNEIQDAVEEDDLADTSSTTPAI…	related to transcription activator protein acu-15
XLOC_010044	8.16507	6.15707	1.2628	0.996381	0.406106	0.0705161	0.0265924	0.0449843	5.71228	6.62712	1.04828	0.897376	0.280614	0.125733	0.0460596	0.0632978	FFC1_09686	FFUJ_04206	related to phospholipid-translocating ATPase	MGDKNETWTPNYDNCDKVTDRCPVEYTIYQDYLSEPASGFFAIAFALLFLAQIFQGFRAKTWSYMIWLGIGTVFEVAGHVGRFGLGRNPWQQNVFIVQYLTLLLAPTLVAAAISVTFKHLVVWYGAKWSLLKPRLYPLVFVGTDFISIFIQIIGGGLTAMQSMGKGSETTQKLGEALVIGGVAFQVANMLCCGGLMLLYTRRRKQAMKHRDPLMGNAADMYTTGMPTRGRVPVAREEATLKEAKRVKWFVYALGIAYTCIIIRCAYRIAETVPDIGVDVLRNETLFIVFDATMMLISIGAVTILHPCFFFPYLGLRKKQKNQSKVYEGYRMESSSALVGQQQHPQQQQGYA	related to phospholipid-translocating ATPase
XLOC_014157	3.54732	1.67921	1.32768	0.707826	0.297183	0.1114	0.037269	0.0287377	1.30308	0.31766	0.156726	0.354901	0.34208	0.102889	0.0592894	0.024639	FFC1_13620	FFUJ_05269	related to monooxigenase	MPSAQPIRGDAFGSPDSNLDYDVLIIGAGLSGILSLYRMRELGLKTRVIEAGSGEGGTWFWNRYPGARFDSESYSYIFSFSQEVLDEWNWTEHFAPQPETLRYIQYLTDKFDLKRDMQFNTRVRSAKFQEDTSSWLLETEDGEQYTCRYLITAMGILNQPTLPNIPGVQNFKGQAWHTARWPSDASALNGKRVGIIGTGATAIQTIQAISDKVGHLTVFQRTPNWTAPLRNKKISPEEMDEIRTRYPEIFRKCAESYACFIHVGDSRSVFSMTEEERQEQWEKLYAEPGFAKVLSVSSDVFTDHKANELYSKFHADKIRARINDPEVAEKLIPKNHGFGTRRVPLESGYFEVFNQSNVKLVDIREDPISQITETGVQTGDAFYELDVLIYATGFDAVTG…	related to monooxigenase
XLOC_014172	19.4786	5.03531	1.89475	3.41036	2.10576	2.02344	1.69947	0.78526	7.18751	2.50018	1.25726	1.69075	0.241154	0.852288	0.828885	0.293613	FFC1_13659	FFUJ_05308	related to MFS transporter	MEFKNPNTVTINPVSEQSSSGTNDNGNQLDTHTITPVSDQSNGGSDNRGKKPVPLGIKILAVAIVSMYTFGSRWSNGVTGALKSTLKKKLHISNTQYAILTSTKDIVKLSLILFSGVLTDRYGGASTMLCGTAVDTFGAIMVATATQVRSFKFMIVGSIIESLGEVAISTAQYKILSSWFAPSSGFASSVGIEHGIGKIGSFVAKSTANIIAHNLGLSWAYWMIVFMNLFTNAIALLFWWMTRQCEKRYTHIKDPATGETLTENTKKFQIRKIILLPWSFWLVCLFTMLEDPLSNLFSRNSTELAEQRFNISPSKAGLYSAVSHYSGFFLAPLIGIFIDVFGQRITLMLICGSGLLLSMCLLTWGPTVAGAAASLVIYGIFSSYDSTLITDSLRTSMWY…	related to MFS transporter
XLOC_004042	17.8697	11.4717	3.45499	11.7937	15.1641	15.0491	11.6	10.2998	4.48103	3.57212	1.37355	7.71434	3.30311	3.8841	4.24952	5.63808	FFC1_03842	FFUJ_05362	probable mutanase (glucan endo-1,3-alpha-glucosidase)	MVSVSRLLQGIGLAAFAATACRGAVLDSRSLAERASSSDRLVFAHFMIGIVGNRQSSADYDDDMKRAKSAGIDAFALNIGTDDYTDAQLGYAYDSANNNGMKVFISFDFHFWSVGDAAAVGQKVKKYADHPGQLRIDNRVFVSSFAGDGLDANAVRSASGSNIFFVPNFTPWGGSTNGIDGALNWMGWPNDGNNKAPKDGKSVSVADGDTSYTKWLGNKKYMAPISPWFFTHYGPEVDWSKNWVFPSGSLIFDRWNEVLQKGFPMVEILTWNDYGESHYIGPLKNKHTDDGASKWSNDMPHNGWLDLSKPFIAAYKNKDTNVAKYIEKDQIIYWYRRNLKSLNCDATDTTSGRAPPKPNENYFQGRPDGWQSMEDAVYVVSLLKSAGTVIIKSGSNTVT…	probable mutanase (glucan endo-1,3-alpha-glucosidase)
XLOC_004057	1.28621	0.52429	0.200385	0.924407	0.105581	0.119036	0.0283622	0.0443515	0.494946	0.602993	0.0377365	0.607358	0.0810842	0.0485361	0.0477203	0.0574459	FFC1_03879	FFUJ_05398	related to monomeric sarcosine oxidase	MSNSNFQVAVVGLGALGSAAAYQAAIKGATVIGFEQYDFGNIYGSSHDTSRIVRTSYGSPDYVALARAAYKDWAELERRSGLQMLTITGGVVFFPKLADDGASLNKFEKSMSASEFMRSLDANNIPYEVLSSREVKKRWPSFDIAEGVQTIYTADSGIVHASKSVAAMQYQARANGAVLKEKTRVDALVPDSNGKGMTIKTSRGQFHADKVILACDAWTNKLITPLGTNIPLQIMQEQVTYYKPTDITPFDDTKFPVWIWAGSRYFYGFPSYGEPTIKAGRDTSNNFMTPEERTFVPSDDLFNELTSFMGGLIPDKGQAIRTVTCQYAITPDRQFVISPLKNYPNVIIGLGGGHAFKFAPAIGRVLAELAIDGETKEDISNFGIPRVGADSKL	related to monomeric sarcosine oxidase
XLOC_004060	0.591186	0.0435592	0.12416	0.0429813	0.205146	0.471624	0.272003	0.418549	0.367202	0	0.0839699	0.0744459	0.0960062	0.378715	0.118745	0.451638	FFC1_03885	FFUJ_05404	uncharacterized protein FFUJ_05404	MRLELVLEANANAHSYRPGDCVRGELLVWGHRLKQPSEITAELQGKLSLHSNKRQIGATSSSTYTGSPCNKSDDVVHTLFQQTKKIKLATNNSTFNPQSYNHDADYYAPFDFTLPNSTCQCRCQLPPSLDRSSSGYTVKVEYAIIVTIKHRLLCRVSRLKTLRRAISFESEPSIPVLPSSNIGSLSASKLFPKLYKALASQGVSRIRSRSDECLPQYEPTLQLELLLPSPPILTPGRPSEIQLILHTPSELINSENIYIRSVEAQLETCIEAKVGLVRKTVTETQTGWSLQGMFCVDRQNFELDLGAWGQYLIIDALPTSKSCVLDTTHLLRISVGISVGGSERTQVVEASLEVIIIGAPPSYTAVYI	uncharacterized protein FFC1_03885
XLOC_004070	3.85533	1.19197	0.323124	0.0568828	0.0320114	0.0887406	0	0	5.60686	0.629353	0.543661	0.0985241	0.0554457	0.099837	0	0	FFC1_03900	FFUJ_05421	Protein of unknown function localised to cytoplasm	MCSSSTYPTEAGTAISTLHANDPGTTADTIINALERDGALIVKGIASKSLCEQIRSDLKPLFDSDVKDDSGFFPPTTKRATGFFTTSDACVELAINPLFQSVAEKVLGSKYTYWEGQEQLTVFGKPYIASAVGFRVEPGGKQQALHRDDSDYHPRNCDMPVMLGCVTALTKTTKENGATIVIPKSHLWGPDRCPLDEEAIPGELEIGDAMLFLGNVYHAGGANTTKDDARETIGMFMCKGTLRQEENQYLSIPPEVAKARNFPPKMLRLLGYGMCPPALGYYKYRDPMKVIFGIEDEETVKK	Protein of unknown function localised to cytoplasm
XLOC_004150	20.6227	11.1216	3.40997	3.3729	4.78303	5.69201	6.02645	6.57889	8.66532	3.13144	2.14823	1.28389	0.965078	1.84076	1.70623	1.97977	FFC1_04051	FFUJ_05559	uncharacterized protein FFUJ_05559	MSRYFSTTARALLRFIWRGSEPVDSFENLIKDKVSRNPRLADADTVEIAGQPHTSRRDQGFRVSGQIYKGTKRLTSIHAYEDGRVVYSKDDYNNSQDE	protein kinase
XLOC_005091	8.4606	2.62162	0.586068	1.21188	0.140994	0.194275	0.174209	0.169281	3.16397	0.178931	0.299758	0.414406	0.102615	0.0852304	0.107052	0.176925	FFC1_04313	FFUJ_05807	uncharacterized protein FFUJ_05807	MRRILHMNHHYPLTKEMFNTNNTLRFDLEHPEQIILIPTKYNNRIDMEKAVKEVVAKMKESRERLGEMGRDKTLSQGQVQSTIDIATNIVESMNHIVKRYYNEREEGLSVMKQREYAAIKDTGMSKPFKHAAIALKYHLDLQEKWFTFQVARRGREMEDGLDKLKRYSQEALLISNGNEPLWGTTLA	uncharacterized protein FFUJ_05807
XLOC_005267	5.76031	4.21683	0.640177	0.430733	1.13783	0.71464	0.871041	1.5326	1.25373	1.19646	0.267374	0.275938	0.512902	0.144151	0.2457	1.18933	FFC1_04626	FFUJ_06112	related to alcohol oxidase	MAAAAAPDSTYDFIICGGGTSGCVVAARLAEDPNVKVLVLEAGPHNEHLENVHMVGGWSNNFDKETDWNVVSIPGPGVNNRSVKLSRGKFLGGSSGCNGTLMVKGMKQDYDDWNLPGWSGDEMFKYMLKAENFHTKDWFKETKGSHGYDGHVHTEPHDLAPISNLIGESMVSKGLPLDHDMFSSGVNPHGCGHSVRTVHQGLRTTSADFITKQKPRDNLHLMVETHVDKVTIEKDGQGELKATGVRAVKADGSVLELKASKEVIISSGAYCSPNVLNRSGIGAKVELEQHGITTLVDLPGVGKNLQDHLIVFMFYETDKEGLTTDSLVYHGNALEKAYTQWKEEKKGPLTVFPFGIFAYARMDERLADSKIWNAAPRKEGRDPMGLTPKQPQIEFFTTE…	related to alcohol oxidase
XLOC_004624	4.95458	2.06573	0.92323	1.34394	2.8241	2.51624	2.92645	2.9719	1.33502	0.94947	0.473137	0.911803	0.813949	1.65597	1.58975	2.74974	FFC1_04887	FFUJ_06352	probable proline racemase	MPFKRSFNTVGVHCGGEVCDVVVGGVRDVPGKTMYDKMMHFWKHEDHLRNLLLNEPRGCSAMCHNLVLPPTNPEADYGFIIMEHEEYPPMSGANTVATVTCLLETGMVTMQEPETVVKLDAPAGLVTAYARCENGKCKSVRFHNVPAFVFATDKEISVPELGTVKVDIAYGGMIYVLVDAASVGLKIKTTEGAKLVKVGERIKKAVMEQTDPVHPENPGIHGVTIIEFTEPLYEYKDGKAANNTVVVSPGRLDRSPCGTGTCARLAVLHAKGELKEGENFYHRGITGTEFVGRVEGTTKVGEYSAIHPSVEGQAWITSFKQVVLDSTDPFPEGFRVGDTWHLDPEE	probable proline racemase
XLOC_004700	0.734069	0.200872	0	0.257191	0.768103	1.09632	0.739205	0.599809	0.124385	0.215493	0.0485498	0.141404	0.636522	1.20182	0.793912	0.678106	FFC1_05025	FFUJ_06489	uncharacterized protein FFUJ_06489	MGDHQNQATANIEDISNRVNGLNISGKKMRRRPRKSLDEALRSFDETAVAFTEQANTVVKLLDTDGELNRADVESICLVRTRGLQLVRLAQLLSDSAIPALVRQVICLDAETSFAVHDLLEYFKKQIENITRRVIGISGSEGILRKIAEECYHQATSPTGELNPDDYLATSKWAESKDRRENWIKFWTRSLCNCPGGPTLFQPMEDSVTKPPTQTPRYLFRAWDNNSTGINGEDVIASILSKDDNENRHKIDMFSMDYQEASEMLHNHLDKGLVNSRLTDNLVSWSSSLIFVFQYANYRFCQWWNKQQEDVYICAVDTTKLPRGQFARDKWLLNWFSNATLLEEENSFRNFRLNRTDYDNGEYLSQGKLHIDGRSCTFSLRELKDSGLWDLYPEFNIHD…	uncharacterized protein FFE2_04566
XLOC_005505	1.40735	1.32861	0.439938	0.092486	0.164875	0.0834488	0.0941306	0.152552	1.07243	1.38444	0.138336	0.00381869	0.0478051	0.0262162	0.0367845	0.22006	FFC1_05069	FFUJ_06531	uncharacterized protein FFUJ_06531	MDLQNLSAAELVQRFDNDRTNTTLAEQIHRRTIDPSLNGELFQEIKNLKDSIEGVPKPPGDEFVRPRPGPKTSWENCIGQQKCTPKSLRYPKGLSDLVQAVKDGREQKLNVRAVGSGHSFSNICPTDGILLDPPGMNKFLKLNSETLKDPSKASDHVLVESGITIKDLNSQLDKMGKALATMGAYDGQTLVGAITTGTHGSGKDSGNLASLVSAIILVSETGKVYQIEPKDGITDPAKFVPGDAEELKQDDDWFQAALIAMGCLGLVYSYIIEVVPTFFLSEVRSLTTWQDYKSQLAGGLASAPLQNHYFEIDLNPYQTVGRNIAVTTIRTCSKATKREGGRGFDNWLAGLLAQHHWVEDILVWILNRWPLHSPGIITTAMKSLPAKHYVDKSFKVLNI…	uncharacterized protein Y057_7228
XLOC_005521	1.97304	0.800324	0.083372	0.0635996	0	0.0381572	0.0412351	0	0.848398	0.291282	0.140275	0.110158	0	0.0642003	0.0693794	0	FFC1_05098	FFUJ_06560	related to heterokaryon incompatibility protein (het-6OR allele)	MTSPFLYFPLHGDEVRVLKIQPAKDITSTAKRHPIICSLEHVSLPATGQDFTSQQFKGAGRTWPELSATPDTDALFKNGRDPHASEGSTRSTTVEVLGAENDLPWRYKWGDFIALSYVWGYPKRKEGEPPYLITVDGVAFEVGPNLYFALAQLSRSIRIRQGFKVWIDAICINQADLDERSQQVTRMRDIYQSAWQVVIWLGPEEHDSSLAISALYWLACESEQTKPMERFYTEEFSVDLRPLVIIWPRYKSSMKKDVYRALFHFFTRPYWRRMWIVQEVAMGNMNSPVICGNACISWNDLYRAVGIIAADESRFGREILETVQPRILPAWSFEFARDRLLHERTWAPERMWKIHQTMTKIQNNQRLAPLSTKWEDLVRALNIARDSLITEEKDRVYGI…	uncharacterized protein FFC1_05098
XLOC_005548	1.94197	0.933768	0.575029	0.348553	0	0	0	0.0692155	0.718283	0.149236	0.132398	0.0143915	0	0	0	0.116458	FFC1_05154	FFUJ_06608	related to dehydrogenases and related proteins	MATPQVKRYVIVGMGVRSAMYYQAIIQDFKDVAKLVGICDTNQTRMDVANEHIVELGGEKVQTYKDTDFDKMVQEQKADVVIVTTIDLFHHHYCIRAMELGCDAITEKPMTIDEHKLQAMIDAEKKTGKQVRVLFNYRYAPHHTKVRELIDSGVIGEISTVHMDWILDCAHGADFMRRWHRHKETSGGIQMHKSIHHFDLVHFWLNTEPELVYCLGDLRFYGKENAERRGEKNLGERYQNNENAKNDPFAFQLDENERMKKLYLDAEHEDGYIRDRNCFAEGITIEDNLSMIIKYKNRAVMTYNTYAYAPWEGYRCVFNGSKGRIEVNVVESGYNPLGDPVTKDASGEDEKYIQGGVEQTKIVVYPLFDKPYVVDVVKSEGGHGGGDPVLLKDVLLGGE…	related to dehydrogenases and related proteins
XLOC_004771	2.77555	1.34797	0.120795	1.81548	3.56994	4.21342	2.91683	2.77164	0.580027	0.376353	0.126729	0.569915	0.379612	1.07889	0.663046	0.58531	FFC1_05163	FFUJ_06616	uncharacterized protein FFUJ_06616	MAFSSVHAALEPYVDIPFNASLSGILFLAYRCLISKPGLLLIIVYTTSAIIVLFDRTSTRKEMAKTMAELPLGLGSVLWFIVSGRSTKVQWLHAFTIYVNFAVYGNILMMVATPSGGTFRGIGCKVACISLSAWIVLQGYQVQWETIMLHDDLFVFTAASKSWIFAHAAYRFILLTLPCFGSGRRHRLMEVYSLGLTYLLSWSTGLPFEYCFGMADTIVAPAVTAWSSISKTFNLITRDAGNGQPSANGISDTGDVYLGIVALAVAAYAGLNMLSLGRLVF	uncharacterized protein Y057_10668
XLOC_005566	1.14807	0.636037	0.129496	0.200744	0	0.049705	0.0447585	0.0101883	0.646249	0.386692	0.119466	0.289608	0	0.040388	0.0753077	0.0171422	FFC1_05183	FFUJ_06633	uncharacterized protein FFUJ_06633	MSTGLPIRLLCNDNGIFSVVDPVAHHVTSFDILSYTWGKEVAPYKCGIGGVTWDIKINPDKLKDIKRLMVAANIKYLWADCVCINQTDENEKTAEIPKMFEYYRNAERCHLLMDMEEAWIPQEIVDDLKFLDHVLYHMQGAALASEAVGLTERVVNLLTHWASTTWKFDIAQSSVRSAAIDMGVLNCYSTCIKRVTSLFDNDYFTRVWTFQEMILGKNITIWGVNPESIFYIGQLHTWMDLAIECADKAVKLHDWIENGRFFKTAAVNAILRVIGEDILFLVSLRTQVKGINSARTDIINGGSYWWRENYKGISNIFSAISLKPRKCRDTADIFRGLLGIFSGLFTDDEVKTELSGKDITSISFNFFKKLSAETGLAWTKLGVASKARESGWNWIPLVA…	uncharacterized protein FFUJ_06633
XLOC_004790	1.28831	0.604062	0.172202	0.803988	1.29074	1.62988	1.24012	1.0303	0.20406	0.142	0.0919555	0.366696	0.255542	0.562868	0.807219	0.778606	FFC1_05205	FFUJ_06653	uncharacterized protein FFUJ_06653	MNFYPAPPIIKAEIYLRIPDDKRCLGQESEWRGGFAGSFQHIFLEGPVVDSAGNLYVVDVPYGRILKIDGDKNVRVACTWDGEPNGLVGTVDGDLLVADYKQGILSFSPETGKIGPKLTRKNLERFKGPNDLIVDSKGNLYFTDQGQTGMTDPTGRVYRLSPDGRLDTLLDNGPSPNGLVLSRDERFLYVAMTRANQVWRLPLHADGTTSKAGVFFQSFGNAGPDGLSLDEEGNLFICHPSLGSVFVVDTHGVPKARIVSGSPGINLTNCCFGGPEHKTLFITDSLEGNIQTVDWHCRGAVAAPALKQSKE	uncharacterized protein FFUJ_06653
XLOC_002421	8.07936	4.29667	1.2287	2.01999	1.86729	1.55421	1.8961	1.19933	2.59264	1.60114	0.928302	1.08542	1.32814	1.24473	1.04269	0.842748	FFC1_02352	FFUJ_06828	related to multidrug resistance protein	MYGLLLLSNLYSLTTDVLQQDRYHVVLSVASVVATALLCPLLYLEHVRSTRPADLAVIFLLVSLVCDLGASLQEGPEEWLIPTTKITLKFLLIAAESRSKQGILKSPYSFQSPEQLAGILSRTFFWWINPILALGNQIILSGEDLPPIDHLLTSEKLRHDGLKAWDQRARPLTKITLPICLVKSMLPQFMAPVVLRLCLIFFRYAQPALISSAVHELSSHSDGGRLMLIMKAATVYFGLAVFEALYHHRLNRLSIITKGTLIGLINNAALRQSSSSYNDGIALTLISTDTESVMRFAICSRMSRYLARNLQSKQKAWNEATQRRISLTASAISSMKVMKMLGTSRQTEVLIQKLRAQELEMAKKVRWMMVAYNASANALGIFSPILTFVIFVMYANVRG…	related to multidrug resistance protein
XLOC_002441	0.41406	0.218212	0.068724	0.38115	0.998449	1.47063	1.36471	3.15265	0.0475391	0.0201562	0.0602338	0.111505	0.0368584	0.136706	1.32062	4.40517	FFC1_02392	FFUJ_06868	uncharacterized protein FFUJ_06868	MVAKKARTELEKQLKNDDRDVADLWKEALKSYESIVGFGLQRKFDNVQSMLDYGTDQMNNFHKFRHDKGKVDRLRTLFSSNLDLVEQGANQIIAAAAPAFPPAAAIGTALTYMLQACRSVSADYDIVIVFFEDMNSFLGRITILEKRLPQDKAYQNCLMEVFTSLLTMCGFAHKYIELGRFKKWISNLFKGDDGELGGARANMNKNLDHLQQATEFAILGNTEETLAMASQLDENQKSHAEMLERVGHTIDTIHENTENIRGDIAKILKLFGGQKKEKTMEKPQANKPTSSNSIRNAMPIVLNDDHEYHALKETLLPDSCSWLFSEPEWEEWLKLPDGTRPILAVTSEPGTGKSHMAAALHDKLAQRASEDETGHTCVAHFYFREQEDAFAFLLCGVIT…	Uncharacterized protein Y057_9246
XLOC_002471	3.63869	0.798281	0.162038	0.451798	1.79703	1.39005	1.73758	1.57921	2.29765	0.193057	0.0567054	0.301441	0.248078	0.368472	0.155335	0.374678	FFC1_02444	FFUJ_06918	related to ornithine aminotransferase	MGDLQLSPASEPHLMHRSLLTRPETVSSASGVWITLSSGRKILDGCAGAAVSIIGHGNTEVRDAMVEQISNVSYVHTMAYTTDSAEDLANFVLEGEPFDLTRAYFVCSGSEAMDSAMKIARQYHVENGQPQRTKFVSRRRAYHGNTIGAMSMGSFVARRAPYEGAILLDNVSYVSPAYEYRVRKDNESEHDYAQRLVDELEAEFQAVGPDTIMAFVAETVGGATAGCISPPAGYFEGVGKVCRKYGILLILDEVMCGVGRCGTFFAFEQDGDVRPDIVTTGKGLGGGYAPIAATLVHRKIIEILKKGTASFNHGHTYQAHPVSCAAALAIQKIIRRDNLVSRAATLGARLHKSLVEVFQDLEFVGNIRGRGLFWGIEFVKDKKTKTPFDSKIRFGVKVQ…	related to ornithine aminotransferase
XLOC_003330	2.81753	1.33301	0.415956	0.47577	0.0207697	0.0207091	0	0.0678136	0.0592858	0.419545	0.21907	0.0681008	0.0359744	0.0358692	0	0.0581418	FFC1_02504	FFUJ_06972	uncharacterized protein FFUJ_06972	MAGPRFNDPVYGSNVVTGISATGNAHQTFNFNQHFESRLFFLFPYEKNEEFVPRTEISSKLEELLPKDSDDFRSAALWGLGGSGKTQIALDFAYSRCSKRKCSVFWVHADSEVTFARDYGSIASVLGMNTQGSQHELLQNVRHKIESLPRWLLVIDNADDLSLFGVGSRVRNTSKIMNYIPKGPNGTILWISRNEAIVGSLAGVRRGIVVPRMTSEESKALFESTMPQSISDDELDDAVLLLKELQFLPLAISQAGAFMRRTETSVSQYLAEFKKETTRWRMLKEPEFDRYRLHNNSNSILETWSRSIHHIRQENELAHKILHILAYADNQTINERLVDAAAAYGETKQAEDMPESKKKEAIRRLKNFSFLIEYHIGDNERTYEIHKLVKDAIRYNIRS…	uncharacterized protein Y057_8807
XLOC_002597	4.47224	2.07562	0.31442	0.206945	0.125612	0.470782	0.0897566	0.265554	1.97168	1.10697	0.171547	0.109459	0.128302	0.360913	0.151019	0.201764	FFC1_02673	FFUJ_07132	uncharacterized protein FFUJ_07132	MLANSLLVLASATLALASPLATFGPGSSCKPGKPAPVLPVNGGASELPAPPQGVALKHIAFGFGIQNYTCADAAATPAAIGALAVLYDITHLYPGQGPSSLTPDKWASFTGDVLSTGKVPLNLNTNGVGASTTNPFPKKQDLKVQGLQKKLPYLGHHFFNAAGVPTFDLDKANQLLVCKKLDGIKAPSTASAGPDGTGAVDWLYLGDAGGSVGVSYVYRVMTAGGVSHGCNAKGTDSTSYTTLYWFYG	uncharacterized protein Y057_12154
XLOC_002758	1.44305	0.554044	0.401015	0.155452	5.1865	4.96361	4.08658	3.80167	0.737274	0.0294452	0.193789	0.0727189	1.65082	1.94772	2.23722	1.66899	FFC1_02995	FFUJ_07438	uncharacterized protein FFUJ_07438	MSPTESQSDAAQRMYTERATTYEDSWHPDYSKRFMELVPIKPGDRVLDLACGTGLKAVIAARHVGDDGIVVGVDITEAMLSEARKTLDRDETLHRRMKLVRHSVTDLTGCLNVDRDSFDLILCSNAFVLFESPEEVVAHWREYLKPGGRVAIDITHEYNLRSGLLLEKVARRLGMPFPSNRSWIKSKESFSRILGSCGFVVERVVTLEKIVGLGSTYFGLDKADEQFDYVVNGPLAASIITEELRVKGREYFKEEWHNAAVDGEVEVSDILYVYIARKV	Demethylmenaquinone methyltransferase
XLOC_002910	26.96	12.1985	5.07435	6.95233	11.3226	10.9531	9.94054	7.69938	15.8164	4.32834	1.14184	1.60296	3.23379	2.28011	3.88761	1.29257	FFC1_03254	FFUJ_07684	uncharacterized protein FFUJ_07684	MKHNNNVRLLAVLADPESDEKSEYRFLVDGAHVRYVTLDGGLIDPEHRTYEPKLLPQLPVFPSGDWNEGRVGKDGHTGKPFFCETRRSSLPGIGNVWHDVMIDHLELRQIERVRQTLYRVSHPAFKTPVLAKFAQFPWEIPFFAAETTSYEWIHGQGIGPEFLGHIHENRRVIGFLLEEIHNARTAEPEDLATCQSSLQKLHDLGIVHGDINKHNFLIRQDGDAVLIDFETAYKCTDPDVLDEEYRHVKESLEDTSGRGGAGMASDSSSD	alpha-galactosidase a precursor
XLOC_003804	34.5326	7.50742	5.74161	9.68751	69.8362	46.3929	37.9773	45.4607	29.3915	1.70735	2.53231	5.57539	17.0867	9.59086	7.99914	15.4648	FFC1_03390	FFUJ_07816	related to dis1-suppressing protein kinase dsk1	MATCSLKSLRRPSLTLMSGARKRSFRFNGLISKAATRGLATVTAQTTQPAMMMEDHNTRLINMGYNYNYIEHVENLEQYRLGGFHPVSLGETINNRYLVLNKLGHGGYSTVWLSWDILKQKYAALKIVLADFGEDSTEVDVLQRLEAKAGKKHPGRSLIRHVTDNFHFDGPNGRHTCLVNDPAMMSLRLAKDASFTRLFQPRTARAIAAQVVQSIAYLHESGVVHGDLHLDNILLQLPDRIKRLSPDQLHERHSHPTTVPVTRLDGLPLDENAPQKAVLPIWLGQKSEDVALADAKILLGDFGESYLPSQEKRQYSNAPIRYRAPETQFPDVCQPLSFSSDIWSLGCLLWNVVGQRPLFDAWTLSEDDILQDQIDLLGEIPEEWSAYGAKRSEYWVEDV…	CMGC/SRPK protein kinase
XLOC_003931	1.21487	0.396074	0.227057	0.748667	0.999063	1.0507	0.584829	0.695461	0.170325	0.181912	0.145097	0.214804	0.391563	0.330085	0.24575	0.371925	FFC1_03625	FFUJ_08040	uncharacterized protein FFUJ_08040	MAPVSLFDCPDEVVDGIIELLPGNAIKASRLTSKRLNRIASRYLFPVLYISCHQLDFDVFCMVSKNPLLIGGVRELVIDDTTVPPSVRDWPTYQKVVTFPKDADDRRDHLELDEGETLDPDFMNREPSKVKPCEKAWELFSSTAQGHHENRLAHADFDALKRALPGLKNLKTLVLTNRMADDRFSEGAQSSVSSSPVVKVWRRFEREGYLPLVPRCDWHPTTQGLQDRTPVNTMDWLDDRLDLYLEQQDDEAFKQGRAEFLFDCDSSELLVLAREARAIFLALLVLEDPKLQSQLTEFRSPFAARLGSGFSAAINITKLDLTLSNFSYGIMGDAIVEEGRLRRIFESMIQLEELYLEPHGMSIFSILPTEVTFSRLRFVQLSCGHLHPQMFLGFVRRHG…	uncharacterized protein FFNC_03082
XLOC_003941	13.4781	4.6254	2.02235	1.76966	12.2505	12.6997	8.85152	6.26446	4.36995	2.03047	1.23215	1.17794	4.34982	6.65297	5.03429	2.34902	FFC1_03640	FFUJ_08055	related to aminopeptidase	MAANTSQQQPRGRLRDVIPEAHLGFWSPGPKNGITDVPGVLAHTTTICDESGQINTGLTTILPRKDWFHKACHAGVFRLNGSGEMTGTHWIEESGLLHSPILITNSFAVGPCYTGIYKYAIEHYGKGEEGIDWFLLPVVAETFDGHLNDLRQFAVTPEHVVHAITNASDEPIAEGNVGGGTGMLCHGGKGGTGTSSRIVPGQNDTSYTVAALVQANYGRLQHLHISGVPVGRILQKRRAKDEAAAAHDKAYNDAKDKKDGSIIVILATDAPLLPGQLKRLAKRATMGLARVGSYAHNPSGDLFLAFSTAAEIPVQTVAGEERTIDPFKPELVDVEATDNKTINGLFEAAADATEEAIYNALCMAETMTGNMGRTVEALPLQAAREIIARFKEAEDSFE	related to aminopeptidase
XLOC_015285	1.01832	0.574956	0.205973	0.0811838	0.122881	0.376879	0.763647	1.49491	0.414583	0.238348	0.104183	0.140615	0.209806	0.634106	1.32769	2.603	FFC1_14381	FFUJ_08066	probable acyl-CoA dehydrogenase	MATESSRMPSDPKLYLQANIPWSEPAWYRSGNSVYLNASHRKFRDNIRKYVDKHILPHSLEWEQKGEVPRSAALSYCKSGIPFEDVPERFRPEDVPNLAEIPQNELDAFHFLISTDEMARVEGGVSIALGGASTIGLPPVLHHGTQEQKSRWFPGLFSGCVNFCLGITEPGGGSDVANIQTTAEKSPDGKFYVVNGAKKWITGALWATHMTTAVRTGGQGAKGLTVLVIPLDSPGVCRRKIFNSGQNAGGSSFVDLEDVKVPVENRLGLENEGFGIIMKNFNKERFALAVGCNRKSRTCLAMAFAYALERKTFGKKLIENQVIGRKLAEIAHRIEAHWAWLEQIAFQVNSSSAGWQTPNIASQIALAKIQGGQTLELACREAQQVFGGAGYQKGGRGAT…	probable acyl-CoA dehydrogenase
XLOC_015557	5.37219	3.375	0.172472	2.00597	0.83	2.20797	0.927391	0.83836	1.81222	1.91436	0.290187	1.62937	0.30505	0.142432	0.8705	0.94517	FFC1_14474	FFUJ_08158	related to KP4 killer toxin	MQLTALLATALLAAGQAAAGINCKGSSQCAGGTQGEYTSSFVNLARGLDPNRWYYNGQHIMCTQHLCAFLQNTGGMPGSSIKTLISDLDAHGCNKCGSIPVFWPQDNDEKSHGILTINYVSSPKCNWAIC	related to KP4 killer toxin
XLOC_015364	1.69547	0.584505	0.253865	0.230448	0.0822351	0.0136962	0	0.0404292	1.08353	0.229019	0.0831149	0.147456	0.0424951	0.0230441	0.0249031	0.0680239	FFC1_14548	FFUJ_08236	related to beta-N-hexosaminidase	MLKEYPVAGILLASPLLAVAQDLIPPILEKADSFVEETWSVDSSSKVIYIDKKFASVSDKDGLTLIPPTAHEFATTFQDDLAKITGSNWTLKRVESLPTNVSGISLGSYTGESSDLTYENGKSTSEGYEIIINSNRVFIGGSGARGMWWGTRTFLQLLLAGNGSITSPLGRDAPAYPTRGYMLDAGRKWYSKDFLKELCSYASFFKMNEFHYHLSDNYPLNRGKNDSWRDVYSHFSLLPEDKSLRGILHGRENETLSKDDFAELQSHCASRGVTVIPEIEAPGHSLYLTKWKPELGLAKKDLLNLTHLDTLPTVQSIWKEFLPWFKTKEVHIGADEYDAELADDYITFVNKMSRFINSTSNKRSRIWGTHEPSKRNQTIDKSVIIQHWQYGQSDPVQLV…	related to beta-N-hexosaminidase
XLOC_014716	3.73954	0.744063	0.234868	0.113357	0	0	0	0.0337655	0.599296	0.270739	0.229104	0.00468043	0	0	0.0831939	0.113624	FFC1_13969	FFUJ_08875	uncharacterized protein FFUJ_08875	MSSSGSSRSTTSRNLHLLQFTGPRGGCDQHWAFFVPSVDGSPEGKIVHIRVNKDTRQRVVSCTVHLESFTPTRTRSRFRAFVVPGAVVLASRLKRAGDEVHGAFFSGNSRSHPGDPPSYHMVTNNCQHFCYLVLKNLNWNLPDQVPGHAIDYVESESTPLLAVRQILDTLRRQQDPFPRPIFEADGRWWRYNPMRQQREYWDERNRAWFAPVATPRASYARMSIS	#N/A
XLOC_014715	1.76947	0.481763	0.309831	0.339692	1.45108	0.867215	0.912987	0.576247	0.259294	0.0766237	0.194041	0.169082	0.209354	0.30231	0.245717	0.470909	FFC1_13967	FFUJ_08877	related to methyltransferase	MTDSNESGPAQAATDVSGLLPPEHWAEVAEELGDTDSALRDDNTESTASITSSILEYKNINGRTYHHDIGNAQYWGTNDEKQNESMDINHHVLTLVLDGALHLAPLAKDIKSVVDIGTGTGTDISPIQPGWIPPNLRFDIEDCTQEWTFAPNSQDYIHFRWLVGSIVDWDQLFKEAYRCLKPGGYIESHEALSRMDCDDGSITEKSAMHQWGKFFVEGGKKIGRSFTIVEDGVQRSAMEKAGFVNLEERDFKVPIGGWPKDPRMKEIGKYAQATLEQDIEGYVLFMANTVEGWTRAEVEVYISMLRRELRQGTMHPYYRQKAVWAQKPKK	related to methyltransferase
XLOC_014931	0.846254	0.270812	0.131825	0.179509	0.126297	0.323309	0.305887	0.445331	0.253904	0.244913	0.00444153	0.092749	0.144202	0.410814	0.367052	0.592864	FFC1_13672	FFUJ_09161	related to lactose regulatory protein	MFCTFQGTVESSDSGTLKESKPTRGLHACGNCKRRKIRCDGRKPCNQCESRNLQSRCVYTQQIQRVMPTKRTLENLSRSLKERDAILNRLFPNHSIPQLASLSDQQLREALLHGCSTDKILPSPSDSTPQRSVTQDSQWDEERRERDPLPAEADDVNALSLPFDRQASYLGISSIRAALAAMLQVRPQLRGLLASRQTNINNNIARNEEVRPCYHPSRTLLECPRIKWSSKGQALVDAYFQRIHIFTPMLDETSFRTDYLGSRRQDPPWLALLNMVLAMGSIVSSKSSDRDHCKYYTEAMRHLDLGAFGSSHIETLQALALAGGYYLHYINRPNRGNAILGAAFRMASALGFHREPSYQDGGGDQYEAAEVRRRTWWSLVCLDTWTTTTLGRPSFGRFS…	related to lactose regulatory protein
XLOC_009805	13.3095	5.91778	1.75341	7.08861	0	0.0568515	0.201609	0.218416	4.6314	1.87345	0.490909	1.8207	0	0.0856297	0.17349	0.310077	FFC1_09208	FFUJ_09178	related to methyltransferase	MSQKSPKSGSPRSPRSPQSQGPVATAAQALEVDDLPEGEEDDPGLGEDFESSTASITSSILHYRTINGRTYHSERGNAAYWGSNDERQSEAMDIAHHMFTLSQSGELHLAPLSDNIQKVLDVGCGTGIWAIDFADKYPGCEVIGTDISPIQPSWVPPNVKFEIEDFNQDWTFPPESFDYVHLRYLVGCVPNWDNLFEQAFKVLKPGGWVESFEASAIIESDDDSVKPDSALAQWGPIFIKASKTIGNTFTVVGDNLQRPGIEKAGFIDVEQWDSKLPLNPFPKDPKLKEMGQFGELFSTRDTEGLVLFVANTLGWTPEEVHVYIAKFRREIRDRRNHPYIRLRTVWARKPE	related to methyltransferase
XLOC_009057	2.03397	1.48394	0.503427	0.423384	0.343203	0.317814	0.213682	0.253622	1.12673	0.63255	0.357344	0.0757834	0.245606	0.0458576	0.160439	0.0787806	FFC1_08899	FFUJ_09490	related to TOB3 (member of AAA-ATPase family)	MESSNTTTEPAWIVLPRRTPSQVASFNRKFDREYEAFVQARKSQSNMLQNVGENISDMAWKWKHKLLRRKKSPLDGPLDLEKEYNEEEPEETDYRDPSFGADTVIQTLYEGKHSDPGRNNWDWQDYPPKQMPTAIAKARDRVAIKVYKIKDIQKGAISNRYPLKYHQVDIQNPLLVSAIEPILKKENLHLDVHDIAVFKEPFRPLWFCQDEIRDLYRNTKKEYPLKGYLQLLLRVFDEIFRDLKIKRRNLLDKDLIDFRTAWTLFPRDSTAYSYGMNSEFIAKVDGTEYDTNEGVMQLVLTAKVMAFNGEEFIWRKKSLTINEFAGNKPIRELRHYPFEMHPEKDAIEQRLVSRGRKVLDLQGLTYCSYNGIALHPGESGVEKHNVECRILVDVVGYNK…	related to TOB3 (member of AAA-ATPase family)
XLOC_008968	1.94194	0.466102	0.255702	0.710345	1.8478	2.06965	1.831	2.25876	0.462062	0.145494	0.0990204	0.0983669	0.138795	0.77555	0.654264	0.768846	FFC1_08726	FFUJ_09657	related to glutamine rich protein, nitrogen starvation-induced	MSANDYYGSGNGGYGQQGGYPQQQNYGQPQGYPQQGGYPQQQQYSQQQQPQGYGYSQQQPQYSSHSPQPTYGSQAPPQQQYGQQPTYDQRGSSSYPQQQHNNPQYGAPAYPQGGAPGQYPPGQPGPDGDRGLGATLVGGGAAAWAAHTAGGGLLSSLGAAAAGAIGANVLENKFKKGKKDKKHKKDKKHKSRGMDSSSSSSDSD	#N/A
XLOC_009523	10.4645	3.87951	1.65462	1.18198	2.18691	1.08452	0.671048	0.644393	3.24813	1.76756	0.868207	0.784726	0.706093	0.861008	0.723097	0.178466	FFC1_08703	FFUJ_09680	uncharacterized protein FFUJ_09680	MDYSNGFLTVCILTFSTAVCILGLILGVVFIFFQRQREEQLLDDIHHTVCAAIEASYDAENFGCVNDEQTQVLRNYRVPNYSSMGSYKKKATAARPTRTTRTTRTSPTESPIGENW	uncharacterized protein FFUJ_09680
XLOC_008832	4.58197	1.18493	0.655145	2.48647	0.458813	0.251136	0.153795	0.14659	2.03962	0.595389	0.747519	1.51083	0.212756	0.134228	0.173883	0.136666	FFC1_08450	FFUJ_09916	uncharacterized protein FFUJ_09916	MTVKSRLQQPVRIAILDCDYVVPKVAETWGPTYSSIFAHRLQAVNKSLGSDKVLQISAFDIIKNEYPDPNDFDAFLITGSVKGVYDEDLWIARLKAFIQKTYQTHQYVRMFGACFGHQIISEALLEKYGVIVEKDTKGYEVGIHKVVLNPKFAAHFDHVLSLPEGDGLRVQFAHGDHVRFEASWPESWMSIGSTPHCAVQGIFQPGRVLTFQGHFEFNEEISTETIKYFYTPERGFTPEQTQAALDQIRGKDDSEEAAKILHAFFTDSSDA	related to L-2.3-butanediol dehydrogenase
XLOC_009334	134.511	53.2082	35.1796	21.9258	0.197826	0.175173	0.122895	0.11847	46.5935	13.4968	16.9834	9.47506	0.180441	0.154544	0.212862	0.0762339	FFC1_08382	FFUJ_09981	uncharacterized protein FFUJ_09981	MASYYPEGECYFVRSSLRYGPHWNANNQNLFYRSVLLEYYWNGWPASGVTQRSHTRSRWQHGTPSGIGGTRFGDWDRFWVGESRNNSPSDMLRIHSHPNSLNWNECRDHQRGGPRKYILRPVEIQHRDTQWLWIDATIPLRAIYFPVAFNTDQAFPHLCTYVVIDFRHRTQLQMSGTSGVTRTLTLNSHNGLGWHDGLTWGFNITDIIAYLSIPHKLRNPDFGLFASKQRGQELVVWANSSLVWRSSVSITNHPDFFREMDFARILSATFGVEIGWRPYQHNPFLRDLLIRITQLGLGFIPGVGPILSVAFGIGVQLLIDPDSFGRDNILDLSFAVLESVISSGKRSQKFIAPDWLAQCPCGGQQRGVPLTDQQREARKKLGEEINNRLTAELNAQPVI…	uncharacterized protein Y057_10438
XLOC_009261	5.569	2.74726	1.08049	4.18836	8.78426	13.6361	10.2505	5.16923	1.6669	0.412048	0.431894	2.11841	2.74983	3.40148	3.45858	1.65895	FFC1_08248	FFUJ_10115	uncharacterized protein FFUJ_10115	MGDPLSVASGLIAVVTATLQSSKILYETIQSFRNHQTAVLDLVRELEGLESVLTPLQDHVRSDETAFLPLKAPLIQCRQACLDFQILIEQNSRRTRAEARTSWRDWAKLIYMNGDITSFKELLAGYKGTITIALADANLRSSKVTLQVLNDYKNLICDTKLDLEKHLKDIDSKLQDIVSQGATTEAAEGQANLRKFESEKESTERCLEYLKHLLEEINGMSFQPVSTGSASNTTVISVSAGNMTLADSLTISTLKTCSYNLSDTIDRLESHRDNTEENLRRRSSVPDSNHKIDPGANRETLRNELESTKQCLSISASGTMENKYACLH	uncharacterized protein Y057_8171
XLOC_008704	1.8693	0.823779	0.286501	0.630304	0.45136	0.745556	0.436319	1.10118	0.898096	0.677739	0.172119	0.388773	0.16922	0.154234	0.279406	1.57421	FFC1_08178	FFUJ_10181	uncharacterized protein FFUJ_10181	MEGLNEIPKPTHRQIGLPVVIDDAVAEHFPTGSSVKDARSHGASFWTRTARIDVELTDKSIQRYFLKESTGELGMSMMRGECEGAKVIFKYTPEGIPRPIAWGTYKSDPNTHFYLCEFMDMIEELPDIRKFSSMLAKLHHESMVDEDAPKEFGFHVMTHEGSMYQDISWAPTWEQMYTRRFKSFADQERASQGTSEELDQIVHEFMEKIIPRLLRPLATNGRSIKPVALHADIWYGNIATNADTGGPVYFDPSVFWGHNECKSCVSRNRSRADQFYPVDLGNMATPRYRLGRHWMREYHKFFPISAPEEDYEDRNLLYRISGHFCASTLYPDNNSFRKMAIEDMKTLLAKYPNGYQGE	uncharacterized protein Y057_7400
XLOC_011318	1.12431	0.230979	0.172713	0.388674	0.167059	0.0430393	0.0345616	0.0731336	0.424526	0.140007	0.18599	0.184601	0.0806535	0.0375444	0.0326021	0.0955849	FFC1_11148	FFUJ_10234	related to beta-mannosidase	MFALPFLFGAAAAAIYDKPLATVPGQQDAIPNWDFQQLHKISKDTAALSQPGVDTSSWHHAPVSRCTLMACLLAEGTYVTDGPDGLWYSDNLDHFDQSPFSAPWVYRNQFRLSAGHISSQRHYFLQTNGITPAADLFLNGKQIADNITQSGSYVGHTYDITPLAREKNALVVKVYPTNYQDHLAVGFVDWNPYPPDNGTGVWREITIKQTGDVFMGPVSVLVDMDTPMKQNKDHHVDVTVRALARNLSKKPVTFIARAEIRTPDGKHLKVLTKSIRLRAKDSTMVELPAKIQDPQVWWPSAWGKQPLYSVQLTYSIGGYDTSDISPRTNFGIRTVSSELNAHNDTMFKVNGHPIQIRGGGYTSDMFLRWDSQRFEYIARYVLDMGMNAIRLEGKMEHPE…	related to beta-mannosidase
XLOC_011316	25.8125	14.8911	3.36085	5.92668	0.104131	0.0418931	0.0473951	0.0415366	9.05862	6.85367	2.71444	6.7044	0.0487323	0.0411087	0.082091	0.0719439	FFC1_11144	FFUJ_10237	related to alkaline protease (oryzin)	MLYKTVVSFGLATIALALPTDRDNKGPGSSNFIVALKPTANADLDLHARWVSDVHGQALARRGVESSGIDKTFSFPGFKGYSGSFDEDTIQIIKANSSVLHVEPEQTFTIASPVTQQSPPWGLSAISNANPPSSKASYTYDSTAGAGTFVYVLDSGIYLEHEEFQGRAVFGADTSGVTTKKQHGTLVAAIVNGVTYGVAKKATVVDVQVLGDDGGSSSGVLAGLSWTVNDIVSKNRAGKAVINMSLSGGNSVILNEAVQKAIDAEIPVVAAAGNSNEDASKSSPGNQPNVITVAASNKDYQRWAHSNWGPACDIFAPGEEITSAWPTSASATRVASGTSEASPHVAGVIAYLFALEGSRTPAQIWSRLKELAIKDKITDVKGVPNLLVYTGIGK	related to alkaline protease (oryzin)
XLOC_011856	2.8657	0.977105	0.436893	1.22485	8.17714	6.30894	4.14673	4.46531	1.28226	0.327253	0.17014	0.653779	2.54944	0.91081	2.38875	2.85387	FFC1_11101	FFUJ_10282	uncharacterized protein FFUJ_10282	MIRQVRQIPRGTKLEPGRRQNPDNFHHYRKWGFTIYRTYYGKESDEHWQALLYSLRHQTKLAFGAFEEEDETNQDDMRQVQELFYLDVRDDPSLLGGLDVRGLREFCNTEKFKETKATREGNLEYCVSTRPHESRAMADYMFNFVLLADGAVLKDIKNGEYVVKAISLSWDGYSGWGWIRIPTGYLLELWIFLMWNKHRTEFCLRCDGPEAYLEESIWPGDMALFDTGRCSEVRDWPYYSNQKDDMW	uncharacterized protein Y057_1061
XLOC_011264	0.760836	0.171926	0.0938047	0.395614	0.068099	0.237586	0.0974106	0.203467	0.211512	0.160489	0.0908659	0.0508223	0.0318696	0.116437	0.0678797	0.155524	FFC1_11043	FFUJ_10338	related to calcium-independent phospholipase A2	MNEQNPKSPGVGLLDEEGICMLSLDGGGVRGLSSLYVLKRIMDGHNADRKRLGRSAQKPADIFDLIGGTSTGGLIAIMLGRLQMDVDECISAYNDLIKVVFNEKARVHQSKFSLLGQTQARFDSGGLKAAIEKTLKDRGLSPTDSMVDSREPDCKVFVCATSKLDAAVCRFRSYSSHKSSVSATICQAARATFAATTFFNPVSIEGMKFVDGALGANNPVDQVEEEAMEIWCPATGNLQPLVKCFISIGTGRLPIYNIDDRVDKFIGALAKMATDAEKVAEASIKRWRQHFEQGRYFRFNVDHGLQTVGMKEYRKKREIQAATDRYLDSQVQSFWVQRCVENLILKKRSTRPDFEPLITPQQDFVTSSPSPQGPESSQENQSKQPTSWETKSPPQPCYY…	related to calcium-independent phospholipase A2
XLOC_011800	10.843	7.19978	1.26995	1.86531	0	0	0	0	8.7596	6.84024	1.27739	2.22641	0	0	0	0	FFC1_10980	FFUJ_10398	uncharacterized protein FFUJ_10398	MASLVPIKFSVITAKYYRLTGKLVLHAKGTIPGFFLTPCFEQELWIGALKFAVKAYSGGLTKLPHEKEVEFDREFPIHLPIPDFNNKSVLIKNAFGTSEIPIQYLDFEDSTSDIIVPLLAAADDTDALASNPDKKSGYNTTIRPHKDEYLTDKGTLDITAEVPKQPTSWVNIDFNPEFIKLVAASYEKGFIKWTIAWEKVPDLSHDPQRVSVITTVEPEVKIQIWPPIPNPKDIQPYLIHRMFMGGDQKE	uncharacterized protein FFUJ_10398
XLOC_011737	0.432724	0.150169	0	0.106655	0.305434	0.558616	0.319167	0.22723	0.189797	0.132695	0	0.184733	0.14294	0.427909	0.312841	0.12152	FFC1_10850	FFUJ_10516	related to O-methyltransferase B	MVHPKAEKALEEAKKLVAQLESYEDDPINHQNVLKQTEAVRSAFQDPMDQMTHLMEQFSLGCAFHTILGIRAYHAMPEDGSSIAAEELARITNVATTVIQRIYRVAVSHGVFFETAPDAYAHNDLSRILNPRGLGSFFMIVLEFSRAWMHLPEYLKSHKPDDVFDLTKSPAVYSVGKEHLGKSYYELLEMDPNPERRELWNANMVAVDELMPVVGMFPFPSLKNEVVQDPERPFLVDIGAGRGQSCIAIRKDIGDAFDAKYILQDLPGVIDSMDPKDYTGFELMTYDSFTPQPVKNARIYFMRRFLHDFYTPVCIEFVKNTASAMGPDSRLIICDQLIPDMVEKDKFTDLYWLDFALLAMTGQEKKKADFEEIFEAAGLELVKIYPSAYGCTAMLEAKL…	related to O-methyltransferase B
XLOC_011726	1.11062	0.471974	0.203149	0.464687	0.466164	0.315774	0.290582	0.337108	0.489743	0.313584	0.146179	0.188098	0.218771	0.0959799	0.248973	0.323989	FFC1_10824	FFUJ_10541	uncharacterized protein FFUJ_10541	MNQSWSRLLPVVFATFFLALVAFKSLFPRDDPYRCRAVQKTGRWIDPIRDEHGNRDPFKQWQPDGCILNHYDSQDIRRCTEGRPIVIVGDSTSKNLGLAMASLLDNKQYKKDEAAKLFSKTTSFNMTYHGQRIERVANVYLSSHGVPGREQFVSHLETYVDEKTSPPSVERQKGPAMIYIAAGAWYTHPHYGGINSTALDPWDDRFSAFQDHMSKVDKFIGDNTPHEDWFSAPMDPRDGIGNQIFYAPPAGPRYLGNDTKMVIDRGRRAEEVVEMQDWLLDKEDEFNIPFVWSIANLVEGQDKVWRDPLRTGFHVKFHVAELRANILLNMRCNAKLDRMKPYPYSRTCCTDYGVKPLVQLSVVAFGIVYLAACIMCEVLDMFADRSADQSRFKLLNMQA…	uncharacterized protein Y057_6245
XLOC_011098	1.684	0.608332	0.323861	0.735086	1.05637	0.883047	0.482883	0.409461	0.182838	0.355527	0.0939947	0.230446	0.273737	0.324269	0.16255	0.177811	FFC1_10772	FFUJ_10593	uncharacterized protein FFUJ_10593	MEAIGAGASTLAFVLLALKSAKIINESLSLIKDAPRIVSELSKDLESLQSVLRRISGSSLQHAPTSTIESLNDILQACTTELSSIECRLAKFSTSSGSSRSSRMYKGVLAYVKKEDLESARSRIRDKSTQMNLYLSLLQAQSLLQVSSRIDTHATETASILEQILGEVSKLHTKLDQDVAASEVEQLPTTAEDDAIDSAMAGQIGAMALCSELESSISRLSTLINHDGLTLGADDAEQIIDDLRKFVVIAKERSIEKSRPSSNSTGYSSVTEDDTKALGGDLKLIEGLILSAPIIAINQSASGSRKLRSHLPHGTIIKQKRIREEIDVDHGYLTISTNKRRRICTGSSPGSSGSINTFRDVVANLVFRPSSSPWMFSVSLSQGQLFDRSIQSIPRISVC…	uncharacterized protein Y057_6191
XLOC_011700	80.2844	38.5832	19.6936	13.8959	0.604242	0.277365	0.600034	0.14023	34.4575	17.3918	14.4661	12.3577	0.613042	0.31445	1.03929	0.242887	FFC1_10768	FFUJ_10597	uncharacterized protein FFUJ_10597	MKDRTSDHIHFPQHAHRIPRRSDGVSGYSDLLGRAVLISIINYLADVVDAIEDIKLPKQHKDRTKLKNDKKRMCDTAVRGANTLTALFNSAKGQTKYTDPAPKNLPLYRDEIRGQLLYPLSKAKTSKPSLGKSFTFAPWQQRLTAILSGIEEEVCWWLRLQRPTKTYDKRSTTHSHTSKAYGQRSTASKPYDQYSTRTGKTDQRSSRPKQTKSHSQRGKRSRSPSPSGGCAVM	uncharacterized protein FFUJ_10597
XLOC_011091	5.51777	0.856276	0.252943	0.72537	0.0270431	0	0	0	0.756681	0.384955	0.248382	0.480533	0.0468403	0	0	0	FFC1_10762	FFUJ_10602	related to methyltransferase LaeA-like	MASPTVQPTAERAERPHDVPGVLEAEDDGGDTDSTLDLGEGSSSYMTSLKSSIFSYRYEHGRRYHAFHEGAYLPNDDEEQSRMDLVHHIYSLLLAGKLHTAPIDKPQRVLDLGTGTGIWAIDFADEHPSAEVVGTDLSPIQPDWVPANCAFEVDDFEDPWVYKKPFDYIHARELEGCIGNEQQFFDRAFENLNGGGYLELQAQRGFFMSDDDSIKKAVNAEVWAEAVRDSSNKFGKPIDCAMNWKDKVIKAGFVDVYEEVRKIPIGAWPKDPVLKEVGKCQVVQSCAAIDSYTPMLLEKVLGWGKEETQVLMAKAKGELRNPSIHLYLPVYFIWGRKP	related to methyltransferase LaeA-like
XLOC_011037	13.4802	6.7861	2.93986	1.44654	2.55121	9.46036	33.3339	85.0288	4.54892	1.00183	1.48532	1.1055	2.53229	14.7984	51.5668	145.174	FFC1_10659	FFUJ_10700	uncharacterized protein FFUJ_10700	MSSSIQTLSRGVRIAPRALRGLTQVRQLSTTEPSRNLSNTRDSAVHDPIMDKFWGNRINVSETSTIVTQTPSISSTTTSRDPPLGTNVFEPSSAPRWSGISIPTGRQ	uncharacterized protein FFUJ_10700
XLOC_011029	2.01829	0.951373	0.166934	0.910975	3.7524	3.51215	2.37044	1.59967	0.481861	0.588427	0.157667	0.566888	1.20353	1.91929	1.169	0.523845	FFC1_10648	FFUJ_10709	related to methyltransferase	MAGSPPTSKSPSPKESSPKESSPKESSPHEQTAPLEPTELEADEGNIADNDSALGENDAGSSTASIASSIYKFRIENGRSYHAYKDGIYVGPNDNSEQDRLDLQHALCLLTFDNQLYLAPIFQEGETPVKRVLDIGTGTGCWAIDFADDHPEATVIGIDLSPIQPAFVPPNVEFQIDDVEEDWTFSEPFDYIYTRFMTVSLANWPRFFGQSFTNLNPGGWMEVVDILPPTSDDGTMAPETALYQWSKLLLEATEKMGRPFGETMTYKTQMEAAGFQNVTQRVFKWPQNRWPREQKYKELGSWTLENISSGLDGISSALFTRVLGWSKPQLDVFLTDVRKDLKNPSIHAYWPIYVICGQKPQE	related to methyltransferase
XLOC_011593	17.448	4.81824	2.11762	2.32851	12.2412	8.84214	6.56074	9.26139	15.8906	1.18737	1.1641	1.16118	6.53447	2.89021	1.22069	5.39346	FFC1_10571	FFUJ_10779	related to Staphylococcus multidrug resistance protein	MSEPTEPDSRRHPAHKVLEELGLVSLYRSSKDVKILCAQRFIRLFAYGGSTLVLVAYLRELGVSTTRVGLFMTLTLVGDIIISFLLALFADGVGRRAVLALGAILMTASGIVFSTSSNYWILLAAAILGVISPGGNEIGPFRGVEESIIAHLTNASRRGDIYAWYSLSGTAGGAFGLLTCGWVIHHMRVNLGMDVVEVYRDVFYGYSVMGVLKLISAIILSSAVEVHHETEQGSPSDNGEQAPLLPENAQAQGADQPQPKKQLRARISRDSIPTVVTLCTLLALDSFASGLAPLSWITYYFKFYYHIEEGKLGSIFFTTSIIAAASMLVASSLAKRFGNVRTMVFTHLPSAVFLALVPIPNDVHLSVLFLILRSCTQSMDVAPRSAFLAAIIKPKERTV…	related to Staphylococcus multidrug resistance protein
XLOC_010982	26.8369	10.7365	3.60951	6.82469	27.6224	25.883	27.1576	16.2448	10.6407	5.02102	2.27116	6.36628	17.321	22.1299	20.334	14.5555	FFC1_10552	FFUJ_10798	uncharacterized protein FFUJ_10798	MKFTTTLFGLFASQALAVNMYSAPNAAAECGALGVAEWDLDALPAGTEVSELRKCKEHPLSLKIHSRNPDSTKVNVLEKRKCTSSIHKPKFGCDKHWCWQNCGSRKEEEWGAWCWSAHKDGTGDWMSCFTASDCPSDDKYCAKGDCKQCGCGC	uncharacterized protein LW93_094
XLOC_010901	1.7951	0.870215	0.318424	0.642303	1.40997	1.19546	1.45177	2.27437	1.40264	0.625598	0.0564779	0.372776	0.406214	0.371974	0.730279	1.03855	FFC1_10371	FFUJ_10976	related to ARG81-transcription factor involved in arginine metabolism	MSNIKSRRTHSFGGCKTCRKRHLKCDQSLPRCNRCKQAGLNCEGFTPALRWLVSTGREVYDRQPTQIADVGAEQYSRRHLFTEEDRELMSNALVTNVPSTVTAALNQIDEESKGLDVKDDAANTCEVGPFQVFKFETSQFATTPSDHVSFNDMDLDTLSENQTQDFSETIENDQIASNDFSTTSLDFLHWGDLFTWDVSVLDNPPQLPFDNFDSLPMNLNWPNESNMGFSESLEMMPFGTASDDVAWPQLDLMMDAPLLLKHFNDDVISQMGSLPINEKSAWKTLHYPSSIMTLSELTMLDVDRNQIKRANLATFYALIAVSSFHLSLNSITFPNLARPGDHWKSLSRRTYEAAKQHLKVSLEKESQPGPHKAKYKEQLMGISAVLATALLSGNETDTR…	related to ARG81-transcription factor involved in arginine metabolism
XLOC_011385	1.24378	0.567187	0.0552289	0.162806	0	0.0224834	0	0	0.197455	0.221221	0.0839195	0.148759	0	0.0472779	0	0	FFC1_10209	FFUJ_11097	uncharacterized protein FFUJ_11097	MISTQPPKHRDEFRVAIMCALSREADAVSLLFDEFWDEAGDPYGRVKSDTNFYITGRIGKHNVVLTIMSGMGTNSATYAAVNLRASYTGLQLILLVGICGGLPRIGDKNAYLGDVVVSKQIVGYDNMFDDGTGRPNADVRPLLAVLDTEFMEKRLKMAAAIYLKELQQEAKEQMRRAEYHYPGAKNDAIYPPEYSHKHKDLCRACAEDPDFFCRSAFQSSCVEIGCEPDKLIPREHREDLPIGADFAPEIFIGRLGSGNTVMKSGLDRDRIAAKYNVVAFEMEGAGIGEEFPCIVVKGICDYADSHKNKTWQNFAAATAASVAKAILAWFPSSSGGQHEPSPKAYHESNELSVANNALVDTAWVSQGDILGSLTYNSEPVQTPEQLSIIEVHRRYLDNS…	Uncharacterized protein LW93_14727
XLOC_010809	5.60836	3.68829	0.938267	1.12368	0.191073	0.286149	0.286725	0.421034	0.858941	1.36549	0.799274	0.628635	0.0712425	0.278678	0.240028	0.561289	FFC1_10184	FFUJ_11122	uncharacterized protein FFUJ_11122	MTSNGTEFVGWTPSPDGRGTYDIIVTCLVTTFLCCWTSVYPNIPAPGDGFWSSIRDKLGLACMGLLGPEFIIVLAIGQKSSARRSVVKFKQAGYTQWTITHGFFADMGGFVLDASDLRQPIPLNAEQLFYLVNNSYVDYPSTSDRELKDRNKSDGLARLITLWQGTWFIITFIARLIQGLHVTTMELTAVSFVIILFGTAWCWKDKPSDVGTTITVPCLTTMEDILRREGRQPDQPYYQTPLDFISRDETALNLAWQYYNELSRKILFSPFSRRVKEVPWDRNPGDIFLRMDFDLELVGVAFIFVFSAVFLGAWNFSFPSTVERDFWRVASVYMLAYGMFGALWMELCMWIFIPQYRLAEGLELSLVEQALDQRPHPVRNWHHRFQNWRRSRFSKIRGT…	uncharacterized protein FFUJ_11122
XLOC_010799	1.82248	0.548451	0.190141	0.624559	2.77748	2.15296	1.93278	1.92614	0.439556	0.291269	0.0737843	0.367171	0.970237	0.312135	0.0887507	0.651562	FFC1_10164	FFUJ_11142	probable general amino acid permease	MDKDEKIVCSDMPADVEMASGNTEVIPSSGLKRELGSRHINMIAVAGMIGTGLFLSSGQVIATAGPVGALLAYTLMGFVTAGVAYTTGEITAFMPSTGGFVRHATKFVEPALGAATGWNFWYTMAINMPAEISAAATLVQFWNTSINPGVWITIFLIFIIVANLCGAKLYGESEVVFASLKIMLIIGLIIGGLVIDLGGAPNHERLGFRYWIHPGAFNTYIKDGSAGRFLAFWKAMLPAAFSYGNIQVVAISGSETRNPRKLIPAATKKTFYRIFFFYFCSIFIVGLIVPYNDPALGVSTGTASQSPFVIAFQRSGVSVVPSIINAVVCTSAISSGSACIFIASRTLFGLSCDGHAPQFFQRCNRFGTPHYAVGMSCLLSPLVYLTVVNNTSVVFSWFV…	probable general amino acid permease
XLOC_013810	1.16437	0.368129	0.129698	0.474683	0.37517	0.515975	0.606197	0.370557	0.344128	0.112707	0.0235889	0.326406	0.10235	0.412357	0.392529	0.366182	FFC1_12975	FFUJ_11203	related to O-methylsterigmatocystin oxidoreductase	MAVTSISLLVLGIVAGATIFYLSSPTRKDRKRPLKLPIIGDIHNSPIEKPLLRWDAWVKENGAIATSKLFGIMPVVVINTAEAATELLGKRGAWYSNRPRSVGMEMITGAGPGQSRFTLMHDMDAHLKLHHRILSPSLGGVAAPRYQPVMELEAKQLVKDLVELSEHKSVVVTSDDVFPFLERAQASIILALHYSVRVPTLDYPLYQRVRETQAKVTSYASRPGLPDIFPFLAKLPAAISPWRRAADKLFNEQKDLNLHLLSLGDDSPGWNATKQARSLAAKYAKEPIPDIDLAFTLATSVQGGIETSTRTILWLFIAAMTANRSFMKRAHDVLDAVVGRDRLPCFADRSSLCYIDAIVSELLRWRPISPGGVPRRADKQDSFKGINIVKNAMVLTNAW…	related to O-methylsterigmatocystin oxidoreductase
XLOC_013708	0.439005	0.116507	0	0.0717096	0.020768	0	0	0	0.11187	0.0487168	0.0254959	0.124205	0	0	0	0	FFC1_12770	FFUJ_11405	uncharacterized protein FFUJ_11405	MAELALAIAGVAGTVDICIKLGKYLVQAYKDYGQVDKLADEVSVRIQICWSRIASQVEIIKELESGMTEDQRELQSHILRILQSKLEAAIVVVSKPDKYGGSKRYKALHFLNLRETLESTVADLESWQKRFEPSWFQIIKTGPANTENVLKSVTQSDTRGRGEPAREGLNFREAFNNSETVKLAEKVLENLVIQAIPYCETELAVKLKESKYFIIDTVSRDTVALRDARELASRLRDSDPSTFGTLKCKGVIQVTKAPLLKIVFSIPEGYSRVRSCRELLLSGIVPDSLTTRLNIARQLVTAVYYVHLYEFVHKNITPETILTLYCTSKGNEHMLVCLAGFQLFRYADSPTNSSKAEKRSVVYQHPTRTGGKAMKFVMQHDIYSLGVCLLEIGLWRSLV…	het-s domain-containing
XLOC_013203	5.62953	2.90165	0.966374	1.25262	0.761142	0.927782	0.359261	1.09372	3.47521	0.921559	0.430111	0.559905	0.269731	0.727834	0.226122	1.01854	FFC1_12748	FFUJ_11427	uncharacterized protein FFUJ_11427	MYDSLTSKTTPSPSHSPLRRLRDTTTQCKRPRCRQQRASRLRAKSFSSFHKGTSKHESSCSQCSDQSPECVGHPLGSVTVFQTSAIASALTNETASPHGKCHADAPCYLHRDQESSHSVLPTDKAMSKSQGLGVSHKKPRGQSHPPKHQHHQRQDLRLWKANSAQPSNRACTSCRTEETPRWREGPAGPRTLCNFCGLLYAKRQQKCHDAPSSHCFTSD	GATA zinc finger domain-containing protein 7
XLOC_013667	42.561	24.7302	15.6646	9.08082	6.71491	7.92878	7.1868	12.7208	29.1975	19.4833	4.03429	6.48199	7.11911	10.7684	9.90407	18.8647	FFC1_12694	FFUJ_11480	uncharacterized protein FFUJ_11480	MGRLDNDNWLYPGDSLTSDSGSNEFRMQEDGKIAIYWEGEFVWQNTEDQRDDIKGIHLQDDGNFVLYTHDDEAVWASDTCGQGDEVYLVVQDDGNVVLYKGEDDEAEAVWATSTNQI	Mannose-specific lectin
XLOC_013619	4.78461	2.25229	0.903988	1.86744	111.87	101.083	65.1096	30.5874	0.710375	0.180536	0.274849	0.473537	29.9989	14.349	19.7057	4.79972	FFC1_12597	FFUJ_11569	related to 4-coumarate--CoA ligase	MPIQSRWSTPTPRISLPSWVFGSEQHGPRNEKIAFVDSDDPKNTLTFWEFELYSKRLAIGLRRLGITSGERVLVFSENGIFVPCLFFGIIMAGAIYTGATSSSTTLELSYQLKNSGAKVLITSTHLIKTAVESARISGLEKSHVFHHDARSPLNNNLSHEGVRSWTELLSPANEAESFQWFEPPNPETAVCCLNYSSGTTGMPKGVEVTHFAYVSNGEAHLLLHRLQQEAWLESYRARALCFLPLNHVAAQTTFIANCPKMGMETYVMRQYNFNDMLRHIEKYEITELMVAPPIISSLVANSALVGNSLRSVKNVICGTAPLALSLEQRANALFKDDRVIIRQGWGMTELTCLGTMNDPRLAGSPGSVGEAAPNSAIKLMNGVNEIAEANKQGELWFTS…	related to 4-coumarate--CoA ligase
XLOC_013504	2.56027	0.951895	0.525971	0.275011	0.0757771	0.0323199	0.0731291	0.0769024	0.365398	0.446343	0.225929	0.262154	0.13125	0	0.110159	0.1332	FFC1_12371	FFUJ_11786	related to methyltransferase	MAEPTINAEPDLIPDEQSGEEHDSSIGSSLASTSESLRSSILDYRKENGRTYHRYKDGKYNLPNDDVEKERLDLQHNLFILMLDNKLGLAPPNDPNSDAKRVLDVGTGTGIWAIDYADEHPEATVIGVDLSPIQPDFVPPNVEFFIDDIEEPWNFTEPFDYVHSRMMTFSIKSWPNLASSIYDNLVPGGYMELLEIDLFAHSDDKTLTEDHHLSKLIHLLDEASIKIGRPFQDNKKNKDILRDAGFVDIVETVFKWPTNRWPLDKRYKEIGEWNNLNMDSFKGLEALSMAALTRVLGWTQEEVTIFLAKVRRDLNDRTIHAYWPVYSTYGRRPLG	related to methyltransferase
XLOC_013427	0.993353	0.409008	0.0666059	0.24704	0	0	0	0	0.691475	0.466761	0.0790368	0.427887	0	0	0	0	FFC1_12245	FFUJ_11910	related to Carboxypeptidase 2	MARRLITFAALVSVVTGQSGGIQRGLQYGENWTPTTKDSDLVSANFPDVNITLRSPAFLNPDKVPGRFSNGTEGPTDDIELDYFIRNLARKHDWMTYELATFESEEGRAIPYVFLSLPSTNSSSDKLRVYLQAAIHGNEPAADESVLAFLGKMDAEPSWAKSILEKMDIKILPRYNVDGVAYFQRQLASNLDPNREHLKLMRGQSRQIKRIVSEWNPHIGLDMHEFTAPTIYGGHYQHGADSLLSGGINPNIDPKIREQLLDFFIPAVGEELESHGLRWEPYVTGPSNRTEGSRIRFTEAVTEARTGRNAVGLTQTISFLLEMRGIRIANQHFQRRVATALIKIQTILELARDNAEKVKSIVEDAREDFINSDEDIVITDSYVPENRTFTMVDTRNGSV…	related to Carboxypeptidase 2
XLOC_013372	19.2738	9.124	3.21246	4.58881	0.200025	0.30481	0.448006	0.210801	7.59216	1.93931	1.27023	2.5153	0.0559395	0.368643	0.568128	0.354683	FFC1_12121	FFUJ_12031	uncharacterized protein FFUJ_12031	MKDLHEALLGPTPKGISEHALSETTARNEESVRQSIARGEDLVELRGAAFHNRTWVISDRFCNVGDGVDSLEGYLHDLWHMYYQVARHTSHETPEHDRVVLDILKIQGRGALTRPVPGLFGVDIARTVEGTLWNDLPFLATDMTKFWIDNGAKLSSAHRINFASFLAKLAATRVSKDRMCQIALVLFRSTLEQPRELNTGEGSDQEDRSRDMRELDLIHLLPSVSVWIKEAGYNLIQLSDVSWNDCPSAIGEGGSMFVESELGKRCPYGFTPWRWMYWLKRLYEIRDEAKEAKEGRLEEYAVDALESMLGAVVERNSEILRAYENAGKDVHEDKYLSCLKDAAQSLEELAMGRMDDDEDTD	uncharacterized protein FFUJ_12031
XLOC_013371	27.955	10.9372	3.12836	1.54492	0.107518	0.0861864	0	0.0794897	10.5367	6.32831	3.08813	1.11746	0	0.169145	0	0.133745	FFC1_12120	FFUJ_12032	related to antifungal protein	MQFSAITLLLVAAVGVAATPIDSPVMALDARGNLEKRLDYKGTCTKSSNTCRYKGPNGRTAFKKCGTFANQKDGAPCVWQSDKGVGGKITCK	antifungal protein
XLOC_012557	4.96827	2.91787	1.15581	0.890677	1.60067	1.18237	0.659725	0.344377	0.931129	0.499019	0.499593	0.255077	0.300056	0.554704	0.56489	0.12631	FFC1_11544	FFUJ_12121	uncharacterized protein FFUJ_12121	MARGLLILCVSALLATASAVKPVVKPADVVFVNGEIYTMCPSNGHAQALAVRGGRIEYVGSKKSADKYIGKNTKVIDLKGKMAMPGLVDSHMHVLSGGLFLLKCDLSYQTLPIEDVIEHIQGCIDGETGKRDDDWLEVVNMDYAGLVEKSGNVGKKQLDKLNTKRPIIIRSSDYHTVLANSRALELSDIDSSTKDPSDGKIVRLPGSQEPSGALSDGASALLAGPPPPTAEENVQAGRAALKLLREAGITTFQEAAAGEEHHTLFSTIKAEDGLSARAYFDYRIEAPKSVDGVPALVKDVVKKLTPWHDNKAIGPKPTLKWQAIKAFIDGVITYPANTAALIDPYWAPVNSSNLDGKWAPDKKSLNNPYWNPAVLTKTLELLFLAGFDAQLHVDGDLAV…	amidohydrolase ytcJ-like
XLOC_012571	2.91075	1.53575	0.610982	0.315561	1.13977	2.08128	1.01653	1.64258	3.28957	1.40409	0.518593	0.289811	0.894732	2.13972	0.153549	1.38751	FFC1_11566	FFUJ_12143	probable aldehyde dehydrogenase	MASTTSITLPNGKKYDQPTGLFINNEYVAASGDEFTVTNPVTEEEVIKLKGASKEDVDKAVQVARKAFEGEWSELAAVDRGAFLYKLADLIDRDRELIAAIDAFDNGKPFSTCLAGDLDESYNVFRYYAGAADKISGKTIETSPAKLAYVLQEPLGVCGQIIPWNFPFMMLAWKVAPALACGNTVILKPAEQTPLSALYFGNLVKEAGLPAGVVNVLPGLGPQTGKAIAGHMDIDKVAFTGSTNTGRAIMKDAANNLKNITLECGGKSPSIVFADAELEQAVKWCHFGIMDNKGEVCTSTSRIYVHEDIYDKFLEKFVAVTKENDKLGSPFEEATVQGPQVSKTQFDRVISYIEEGRKSGARLLYGGSKHGDKGYYLQPTVFADTTEDMKIMKEEIFGP…	aldehyde dehydrogenase (NAD+)
XLOC_012133	1.46192	0.420718	0.231185	0.313424	1.20881	1.09558	1.31647	1.21914	0.608865	0.14347	0.0401441	0.0236131	0.552017	0.918955	1.55208	0.87729	FFC1_11600	FFUJ_12174	related to G protein coupled receptor like protein	MSSAEHLSNSQLRALSIIERTCSVFSLLGSLFIIATFLSSKAFHKPINRLVFYASFGNMMTNVGTLMSRSYIGSPNSVGCQFQAFLIQMFMPADAFWTLSMAINVYLTFYFKFDARRLRKMEIPYLIGCYGIPFVPAFVYIFIKNEEGHRMYGNATLWCWVSMEWDIWRIITFYGPVWVVIAITFFIYIRAGSTIYRKRQELDDFSSTDRDLTYGAGDHLGTIKTTEVSVTTEVVTPNAIHLQPMGGRRAPDPSDPSSNAYSVHISAQPSSGDVGDEVLPIERQQTRASVQVPAQQQQQQRSGGNPSRRRNRELSNAAWQYTKCALLFFTAILITWVPSSANRVYSVFHTKNSSVPLEFMSAFVLPLQGFWNALIYMVTSWSACKNLATDLRMGRRPDV…	related to G protein coupled receptor like protein
XLOC_012229	3.286	1.57067	1.41818	0.67764	0.134792	0.213306	0.153956	0.0323799	0.628501	0.3866	0.912259	0.183348	0.116226	0.0334567	0.266661	0.0560841	FFC1_11771	FFUJ_12338	uncharacterized protein FFUJ_12338	MSTHITILPASTKIGRETIRLLLASPASPTIRGIYRDTSKAPDEYTSHPNFGSAKGDVASEESLDLSNSDAVLYVPPPTYENIDQSEWAKQAANNVKGALKKSGVKRLVVLSGLGSHNDHGIGFVRLNHYTDKILKDSVPEVTILQSTHFQEEFEYMFRMPLGDPPTISSWIAPRDFKIPIVSLRDVGEVCANSLLSKLESPSPQVLKIFGPRAYSSVDLRDMFEEITANKVDLGLAQGEDLKTFFRQILPEHCIADFMEMIESSLPGGLIAKEYEADENTVTGKVDMLEVFRELGEKYGCSK	uncharacterized protein Y057_10891
XLOC_012231	0.689365	0.375102	0	0.613551	0.414417	0.24415	0.130275	0.146777	0.187545	0.119017	0.0431003	0.187201	0.325961	0.156909	0.103411	0.0588191	FFC1_11774	FFUJ_12341	uncharacterized protein FFUJ_12341	MLTSAQLETQGPSVQGSSGILKPDNLGEEEREQRGDDSDIEGRLKPSLQFTGHQLFYVFGLDGIGAMALSGGVNFALAYVMYTTQDTTKNPIRLFQLPNTLSGDAAVTIIVQCILTWFVEMGLVSYDLSKRSVQPIGFVAEPSHQWLRWLFFLPPASDPSDSEVEEKEPQRKPTVPPVLTATVQGALRGFILAVVGFFILWPLSVGVLTTVGERDGGDWRYKDRWTPQAFKAILGGVLGLLTTPLMALFWLIKAGWEGNDERAEARDSRRSQYAEAERMNARSSRQSRYMAEV	uncharacterized protein Y057_4448
XLOC_012292	11.7008	3.24924	1.59139	1.02884	0.266083	0.1164	0.185648	0.349502	1.05173	0.355197	0.706205	0.512133	0.229433	0.0702941	0.217742	0.392267	FFC1_11901	FFUJ_12468	uncharacterized protein FFUJ_12468	MKHWGLWATDTKPPAGHLFHATDAGRQALDLYYEARKVRDPSKSKTMVVCLKIVEAPTVEYLNHYASQVPLMDPSYLPAGEVQWTCRVWVKETLKRLHQNSQIVLPAHVDTIESYGKYTADRYLSYMGNPPIINDLSWLTKAPETDSRNTRQAYYGTEPMQTEVYRQNPHQYQPRYYGAKPMQTEVYQHSSTQHQPRSYGTKPMQTETYQQGYSRW	uncharacterized protein FFUJ_12468
XLOC_012294	27.2361	17.127	6.53905	5.20884	114.473	72.4486	75.8158	49.8232	16.6889	15.6456	5.39294	3.41619	34.5741	22.4979	34.2744	21.5088	FFC1_11903	FFUJ_12470	uncharacterized protein FFUJ_12470	MERHDMLYSDVESASSSTYQHSQTDISIVSASTAPSTILPDEGIISRTYDAAKSLSHIKCPHQLQKDCQRNSTNNSATKAAFKHDYQSYAQTSHMGILDPAYKVFVSKKGYGSLIYKLHARTVVVAGDPLCSEFHRQALFSELRRYRWARGLSLAFVGISEEFAKYAHQQGWATMHFGHEAVLNPLTNKVLRKQAGKRIISQNKQLLDPKRGGVTVNFYSPAVNETDPELERQLQELYDDWREDRNRKHGDGSQAFVTVYDLFSLPESTIFLYTSDRDGKINGLATLRELGAERGYHLDPCIASQDAPRGISDLLVVTAMEMLKASDVGYMSLGIEPLDEVQEVTGSSKLVSRLWKDGYNQMIQSVPVTGKAAYFKKFCPDESLTSKLYICIPSKGIPV…	uncharacterized protein FFUJ_12470
XLOC_012372	1.03682	0.350324	0.145876	0.616299	1.34701	1.09053	0.780569	0.73508	0.320354	0.200046	0.0737988	0.334048	0.531493	0.296722	0.246852	0.33965	FFC1_12032	FFUJ_12589	uncharacterized protein FFUJ_12589	MSLSPRYPGAEEEERERNERWEARVKELTLLPDPRPRALTPDPNLLSSSNNSTASVSGPRPRYQETCLWFRVPPNIRSDILRLAFGDTRIHINMEYNRPHIAHPESSSLHCGIVVGPGEYPGEEMRVLDKTKPATWRWWSSRCHRSYPDETKNQGPMTRGGAPGPWVDNCRNGGNSSVCEAWKEQEGSSACRVGVMGWLLSCRQNYIETIDVLYSTNTLILQGSRMINRLSQMLLPQRLATVTSLEVIWPFKTNFTPDQDYDDLDQGHLRSVLDLLLPSQFPALRRLYVEFHDGQECFLGTSGLEVYEEIILRQLDSFAQRMTHLTECAFALPDYFFRRLHYEAREEAVECSDGIRSYYSRRSYQQVWRDFNGSMAAVVLPYVDSYPKPPFQVLQEDEQ…	uncharacterized protein Y057_12893
XLOC_016370	0.548532	0.0240238	0	0.0697698	0.444239	0.363288	0.40809	0.273917	0.180812	0.0428361	0	0.071248	0.289929	0.397902	0.326197	0.124174	FFC1_15262	FFUJ_12653	uncharacterized protein FFUJ_12653	MASSEGKVNGVIRSNEPLPLTVDELTKHWFVQILNRPVHNVEVIETIHGTASKILIKLTFKNGTDKSASNICVKGGFNPDIRESLPFLYAIYRLEAEFYYYLAPRLKIPLPPVLYAGTDTVNGQGIVVMANLKAQGYTFGNPLETWPVERTRMSVEQLATLHASTWGDTGEQIPSVSETVSIRDAIVGLLATEEWDKRFAPDARPPVPKFMEDRERMTATFKALWESDSKMKCLVHGDAHNGNTFISPTGEPGFLDWQVIHAASALHDVAYFIGGSLSIEDRRTYEKDLLQSYLSALKHAGGPQLEIEDVWEEYRRQTFHGFAWALAGPLMQSREIVDAMVERHWAAIVDHKSIELLEGQEV	aminoglycoside phosphotransferase protein
XLOC_016461	0.305428	0.0167311	0.0605632	0.0589013	0.0197734	0.0515103	0.0410772	0.00730939	0.164347	0.0149383	0.0429651	0.0529126	0.0176286	0.0386663	0.0481786	0.0122984	FFC1_15458	FFUJ_12835	ATH1-Acid trehalase, vacuolar	MLSSYLNYVILTLLSSITLATTTHDHDRIKKCYQRHSSSNHSAKASENIYKTSFPGVTWDNDNWLLSTTNLDQGHYQSRGSVANGYLGINVAAAGPFFEIDLDEEGGVINGWPLFSRRQTFATIAGFYDAQPNTNGTNFPWLLQYGYESVISGVPHWSGLILDLGDDVYLDATVDNRTVHNFTSTYDFQAGVLEWSYTWKPKAQKGSYEIKYRLFAHKLHVNRAIVDLTVVPSIDSEATIVNVIDGYSAVRSDFVKSGEDDDGAIFSAVRPVGIANVTAFIYAQVNGSKSLDLSRRKLVHGKPYVHTNESSIAQAIPVKFSAGVPVHITKYVGAASSDAFDDPEKTAKEASRKAMEEGYEKSLLSHVKEWQSVMPSDSVDSYAFPENNTLSDDEYIIDS…	ATH1-Acid trehalase, vacuolar
XLOC_016304	0.602326	0.206948	0.0173133	0.449596	0.116854	0.0380409	0	0	0.310086	0.209606	0.0291299	0.554309	0.0391075	0.0590552	0	0	FFC1_15490	FFUJ_12886	uncharacterized protein FFUJ_12886	MDSSPRLPLQRRHDLAVVKQQLVVVVSVASTLFVLCPEWLQFYRNLAVIPLLAWLTAKGFDLVIMLNDKWDNAPAMVKYFVPIDFPQITPPFEKIRSLGNRQLAVARTKFRHLSSEVRAVVLMVVNWVLAQISGGQSGVASPVSEEKKAKPAPKPDEWVAILVTTPLINDDAGIDFGTNTIVEIGEVITWDHTQTTSLPAILPPSTFQVEMKLCLVPKSIWYSRKTVLAKFTTGLYWSHQPGQSACQGEQWDEDQIRSISRVQFIGHVEKHNNIDKVNKCFESLCEGWNDVNIYWSDIDFAIVFAFLLVGTSSNEICKKLFDQFSVLRVEKASRNKELNRTRLGAGAAVLTLLTGGLAAPITIPMMMGAEMTTSTHDRYLWSERTRMCKELLGRYEKLE…	uncharacterized protein FFUJ_12886
XLOC_006269	13.6126	6.99651	3.28675	2.78457	0.931127	1.40952	1.40819	1.34548	7.702	4.48034	2.89492	2.66979	0.386272	0.543733	0.775557	0.945221	FFC1_06547	FFUJ_13084	related to RBTMx2 protein	MAGPVEVLSMHPHALDTPPRTPYKGFDSLNSGKESPRKVIGKFPTDSSLGDVFYDPSPTSISSPRPHDESNQEIMPEDPFDSQHNRILFDAIDALQSFGAGDLSIPQLIIVGGQSSGKSSLLQSLTGIPFPVDSGCCTRFPTRIVSRRTEPDSDDSFRITIDPAEVDVPGLDPASDNIKNYECSGKILTKERFAKVIDEISSEFMGLRTGLGEDRKNFVAEVLKIELSGPHRSYFSILDLPGTFQNASAVNETDQAKVEAMVKEYMNNEDNIVICVIDAPTDFDRQEILRLAKKPIKQNRFVGVFTKCDMIVSIATGNSTHSLGRLTGGWFLVRNRADKDPDSFDLSTAEKKLFSKSPWNSVSQSRLGSTAAKSYLGTLLSSKIRDCFPTLRSTIQHNL…	related to RBTMx2 protein
XLOC_006983	204.846	153.251	29.8337	32.3246	222.369	179.833	56.4075	56.4111	13.6032	31.595	9.17062	13.1577	75.254	42.8433	24.4239	62.0415	FFC1_06306	FFUJ_13314	uncharacterized protein FFUJ_13314	MASGAFFNPRVLLLTAPLVSSSITLWFARDQSFFLTLFTKPPIERKKANEILPGYINNFYGSGPWAVLTFIGLTFSTSIVNIWSDRALLRSRGSLIWYGWSAALALGHLAYVPAVAWKLRALWEDNCAAEGTDNVGMLERWLAVNNLRMLTTDLGAWLCAVVAISKTLTV	related to integral membrane protein
XLOC_012025	3.54305	2.04343	0.416171	0.906274	0.62306	0.59382	0.451335	0.699773	0.34234	0.307042	0.196758	0.0861723	0.283911	0.23888	0.223362	0.790282	FFC1_11408	FFUJ_13853	uncharacterized protein FFUJ_13853	MKRPTSIHLVLFMASVAIAADSTCAIDCFQGLITNGPPAGCKEATNYLCFCTMPTLQSNFVQCADKTCADEKAGAMAWANELCGKLGKPIDLGGSGGSPKTDETTAVDTPTSSASNEVKPTTEAGKITDEVPTTTTEAKTESKVEETSSDKTSEVTSESSAGETTATSIKTTVSKPKETNDASGSAAEATADQTSDDSVVTITGTADTATATPSLTDGSNVANSAGPNFYAAVGVAAAFWQLL	uncharacterized protein Y057_12158
XLOC_011902	10.7358	5.71224	1.91624	6.05636	39.0662	29.8644	17.9674	13.9587	1.16997	1.05137	0.945154	3.24652	10.7187	8.32717	11.3834	11.6503	FFC1_11185	FFUJ_14071	related to chitin synthase/hyaluronan synthase (glycosyltransferases)	MGTVESIDSRTQMAFTNVSQGRHLSILKQLLNFTGCLMIIPAFYLATIQTLYPMTIDILFGIILTECNRFANERRRISFYSTFQRENNLKRQNLGFMMKETVTKLDCLSAVVGYREDPALFTRALESYKAAHGQAFMLVGIDGSDAEDGDMVDVFEKVYPSQSRIIHIKEPLGNIAEQLYNKHLAIQHEKGREINESESNKAVIQQCMSIARVILDQQGCLIDEPDGIRHICLVQQHMHKKGIMFTTFIFSLVIAEMLGIEFMWSSDSDTIVLEDTLERTISTIAGDSTIGGASSGLTVHNGDDTVVTRLAATVYWAELYLTRSTPACTATSDCQSGPCTAFRLSALSSILMPWYMQKVFGKRMIVNEDRHLTTNLLVRGWGVVFASDVLTATETPTTV…	related to chitin synthase/hyaluronan synthase (glycosyltransferases)
XLOC_003170	0.262699	0.216654	0	0.149696	0	0	0	0	0.108308	0.124403	0	0.140962	0	0	0	0.0168057	FFC1_03744	FFUJ_14292	uncharacterized protein FFUJ_14292	MADHDIIHSFKSTIASNLQGSYAQVHVLLIAWETHDLGDVDGEIRDLRAIFEQDYRYSSVVFFQIPIRGPSRARLNREISSFVEEQSFPQESLIIIYYAGHCSPNAQGQAEWAAFERGGPTVSWHVTQQLLFSAPGDVLLILDCCHASLISRGSKDGDGRFELIAASAKGAKTPIPGRRSFTRALIRLLRENSSTGISSESLVSELREDPKVTGKTRNLLMGSQASIYIQVETPVFHDFVRKSPTKIFLQPLQPTAATEGFIKKPSGYLVFRASLSDDVTGLQIATWLKTAPPKNVTAVSIEAIVSRARHIQDALKDGAFPQGSIFEQLSKPARDEILKGIRRLNTIMATTAEYAKDDTIRNEGQVIQQSLVDIHDRVSTLSTAIETPLLLDTGSSRSP…	kinase-like protein
XLOC_003166	25.2473	16.3294	6.04462	5.3631	123.57	101.732	67.097	39.8471	10.5656	3.00061	1.84316	1.10558	25.1871	23.9833	39.5828	15.6663	FFC1_03735	FFUJ_14300	uncharacterized protein FFUJ_14300	MKLASLIIVCLPAVSANYPWWTNSGWSKPADHVSGDCAADAQYFCGTISGTRGENPEPNAFPIRRYTCSNADTLGRGCNWQGAVGVILCC	MARVEL domain containing protein
XLOC_005819	3.08161	1.00455	0.248276	1.28994	3.04464	2.71327	1.20385	0.949982	0.708579	0.0875497	0.0410789	0.265273	0.596521	1.48502	0.745711	0.521381	FFC1_05693	FFUJ_14675	related to laccase precursor	MMFNILAVLPLLALAAAKCKVHDQTFTPDYVLEATLEDIKVNCKSRQSVVFNGTFPGPTLHLKEEQTVWIRVYNRVPDQNLTVHWHGISQRAAPFSDGTPLVSQWPIPANNFFDYEVRPQRGDAGTYFYHSHVGLQSLTAHGVLIVKDADKPEYKYDGDLALIVADNYDASDETIEAGLLGDPFKWSGEPQAITINGNSGNQSFDTASDISCTPHVIQVDPGKTYRMRFIGATALSMIKLGIDGHDKLTVIEADGSYTKPAKVDHVQVSSGQRFSYLLKTRPAKDVCRGDDSQFWVRYESRDRPKQISGYAILRYKCPKGPKLPRTLPPSSPVVLPNKTYDYLEYKLEGLSEYNNKAFPRLSEVTRTVTIQINQVLTTGQYENGTLNGTVAWAQNGLPW…	related to laccase precursor
XLOC_005801	1.88872	0.665452	0.262251	0.381836	0.620866	0.439104	0.40501	0.426168	0.575265	0.123021	0.0805069	0.310198	0.237125	0.130622	0.366937	0.534934	FFC1_05658	FFUJ_14709	related to Transaldolase B	MGSTGTQSWLDKLEEQLNVDVDWMAPEWIKAMPFKFHDQTSNQLWVDIQLGDDSNKELFEQTSKELKGQGWLAIYTRMAVLMCKKNIDSIQGRVLLQTLPSKAYDTQATLDHARLYDKEFARAGISRERFCIKIPSTGPALNAAKILSAEGIPTLGTALFSLAQAIACSQAGMLYISPYYNETRAHDELSLWPDVSDPALEHPNSPRVVQILETYKRLYKETGKEQPLVKNASFITPQEAMAAGEMGCHSATISHTVLEKLSKLPYDAYKQPGEGLPKPVHAYKNANPLPERLKKLLSIDPLAGPNWDGKLASTDVDYLANGGAEIDKANEADKATKTRLADALTLFIGGEERSKAKVEAMLATV	related to Transaldolase B
XLOC_000017	1.21316	0.548859	0.120472	1.04077	5.09467	7.14009	7.20519	6.09807	0.502684	0.196389	0.0711219	0.177139	1.31287	1.31576	1.85975	0.690269	FFC1_00035	#N/A	#N/A	#N/A	uncharacterized protein FFC1_00035
XLOC_001261	1.63251	0.717419	0.180327	1.00591	0.0223736	0	0	0	0.29864	0.274486	0.172894	0.280947	0	0	0.0407554	0	FFC1_00088	#N/A	#N/A	#N/A	GTP binding domain
XLOC_012315	1.69594	0.516576	0.165915	1.0594	1.75362	1.57787	1.68411	0.963824	0.266563	0.0594519	0.088284	0.655356	0.423564	0.239658	0.607605	0.36514	FFC1_11939	#N/A	#N/A	#N/A	related to S. pombe trp-asp repeat containing protein
XLOC_008501	6.45284	5.52506	0.251953	2.7819	2.13996	6.97705	7.3243	10.1788	2.18739	1.44755	0.436396	1.09021	3.65374	3.35123	6.63173	5.00442	null	#N/A	#N/A	#N/A	#N/A
XLOC_000084	3.60207	2.25707	0.139718	1.39229	0.15179	0	0	0	0.992394	0.281768	0.241999	0.492623	0	0	0	0	FFC1_00172	#N/A	#N/A	#N/A	serine/threonine protein kinase
XLOC_005223	8.73811	2.24095	0	2.13752	5.10461	7.89162	10.6879	0	3.76135	3.88144	0	1.85192	4.54248	1.3715	1.41517	0	null	#N/A	#N/A	#N/A	#N/A
XLOC_007206	10.6141	7.16705	2.0886	1.17801	13.6799	11.3028	8.42611	3.88933	5.82781	5.28788	2.9734	0.777964	4.32044	5.95654	7.18003	1.44854	FFC1_06744	#N/A	#N/A	#N/A	uncharacterized protein FPRN_05438
XLOC_015300	22.7863	17.4946	7.13658	3.6007	114.053	109.671	71.2957	28.2519	4.62954	6.52782	4.05151	1.62267	20.7435	25.7456	40.836	14.6625	FFC1_14408	#N/A	#N/A	#N/A	#N/A
XLOC_010922	6.12147	3.08356	0.24005	0.191125	17.0198	5.35992	5.95642	5.71867	3.48302	0.693939	0.415779	0.335828	13.2931	2.87634	5.21665	1.76082	null	#N/A	#N/A	#N/A	#N/A
FFC1_15873	3.18093	2.21295	0.608251	0.901645	0.649596	0.833596	0.252492	0.356998	0.466058	0.495757	0.114211	0.456059	0.437311	0.535785	0.235277	0.341559	FFC1_15873	#N/A	#N/A	#N/A	#N/A
XLOC_007950	0.313378	0.123009	0.00796117	0.0282556	0	0	0	0.0161332	0.235112	0.121854	0.0267896	0.0489401	0	0	0.0198751	0.0271449	FFC1_08151	#N/A	#N/A	#N/A	C2H2 type zinc finger domain-containing protein
XLOC_012731	0.516553	0.25548	0.0789494	0.0986785	0.0605883	0.0846147	0.0934434	0.0922228	0.294584	0.165144	0.056725	0.0400377	0.0578845	0.0467906	0.104413	0.0888879	FFC1_11854	#N/A	#N/A	#N/A	uncharacterized protein Y057_6721
XLOC_011759	3.25116	1.29058	0.560624	0.596766	14.4857	12.9215	9.93292	5.92462	0.784451	0.502422	0.384555	0.295346	5.97454	2.71815	6.43941	4.63738	FFC1_10889	#N/A	#N/A	#N/A	related to TAM domain methyltransferase
XLOC_009875	7.28534	2.62933	0.688461	0.678266	0.829469	0.617255	0.983322	0.70481	1.2406	0.185862	0.11313	0.249429	0.34612	0.346319	0.860964	0.461525	FFC1_09339	#N/A	#N/A	#N/A	uncharacterized protein FFC1_09339
FFC1_15850	1.34995	0.706278	0.283158	0.221564	0.119841	0.0973784	0.0287552	0.0212829	0.51444	0.2814	0.126027	0.149863	0.117511	0.0510728	0.0437961	0.0182475	FFC1_15850	#N/A	#N/A	#N/A	related to TPR domain protein
XLOC_016607	0.161661	0.0659749	0.0213288	0	0	0	0	0	0.0801501	0.0157384	0.00656729	0	0	0	0	0	FFC1_15711	#N/A	#N/A	#N/A	WD-repeat protein, putative
XLOC_007223	0.154685	0.0357841	0.0128867	0	0.00751762	0	0	0	0.0894252	0.0317724	0.0163835	0	0	0	0	0	FFC1_06778	#N/A	#N/A	#N/A	protein msp1
FFC1_15849	0.467552	0.13014	0.0329236	0.0282549	0.0225611	0.0090425	0.0102301	0	0.187806	0.0670281	0.0692431	0.048939	0.0201139	0	0.0177191	0	FFC1_15849	#N/A	#N/A	#N/A	ras gtpase
XLOC_014152	3.19864	1.41755	0.491496	0.976221	0.40152	0.672967	0.175445	0.483837	0.885524	0.28541	0.129987	0.340603	0.332095	0.575613	0.0963054	0.346704	FFC1_13610	#N/A	#N/A	#N/A	#N/A

## Sheet: Slow repression
Probe	WT_0	WT_15	WT_60	WT_240	WC_0	WC_15	WC_60	WC_240	WT_0_desv	WT_15_desv	WT_60_desv	WT_240_desv	WC_0_desv	WC_15_desv	WC_60_desv	WC_240_desv	Feature	IMI	Protein name	Seq	Description
XLOC_006546	1.72815	1.00212	1.03197	0.290742	0	0	0.0181113	0.0319076	0.784817	0.368003	0.688343	0.113582	0	0	0.030473	0.055266	FFC1_05461	#N/A	#N/A	#N/A	related to cocaine esterase
XLOC_011288	5.56326	2.34477	2.43784	0.389409	0.664927	1.15172	2.21799	2.32017	2.17057	1.33719	1.60624	0.377167	0.94181	1.32694	3.37279	3.03807	FFC1_11084	FFUJ_10299	probable cytochrome P450 monooxygenase (lovA)	MSTYVDTVLQNPQYAVLSAISLIAILVVNFSFFTQDEKYPVLIPKKPLELTDRRVVKEFLANSKSLLANARTIYKDQPYRAYTEMGKVLVIPPSWVDALKNNRQLDFLTPAKDASAGDSHQYIPGFGPFGFDPKMPTVINKYITKALTRITGPVSEESSLAIRDCLTDSAEWHAIRPQADLIRVVSRVSSRIFMGEELCRDEEWNRTSSEYTLLAFGYGGHLREYPRWLRPYIHWFLPQCWAIRAKLNEARACLKPHIERRNAIKQKALAEGEPCPFDDSLEWFEREYEKHDPAKEQIAVSIVAYHTTSDLLAETLLNLCQYPKVLQELREEIVDVLKAEGGMTKAALYNLKLMDSVVKESQRMRPILLGAFRRVATADVTLPNGDILKKGDKIIGNMS…	probable cytochrome P450 monooxygenase (lovA)
XLOC_009537	11.63	7.93978	8.59539	2.42246	0.446636	0.749105	1.01531	0.772008	4.14406	6.3735	2.02569	1.22825	0.317918	0.371106	0.467781	1.29894	FFC1_08723	FFUJ_09660	probable transcriptional regulator	MYIKGPHAETELPVLRKLIRENPLGLLTTAIPSPNFPFLQSSHIPFVLDIEDESSETELGKLRGHLARVNPQSKAMIENLTENPNLDNVIEQDVIVIFNSPIQHYVTPKFYTETKPTTGKVVPTWNYAAAQVYGRAKIFYDTKTDEAGQFLSKQISDLSRHAETNVMGFTGGDNPVDWKVSDAPDRFIELLKKSIIGIEIDITHMGGKFKMSQEMGMGDREGVIKGFSRLESETAKEMSKLVQTRSDLKEAKKASV	transcriptional regulator
XLOC_009749	3.5567	3.00561	2.52641	0.723435	9.29099	10.1355	8.25559	8.48518	1.07744	0.619054	1.40595	0.478725	3.38704	1.18186	4.9853	4.97537	FFC1_09092	FFUJ_09302	uncharacterized protein FFUJ_09302	MNILKFEYLGPLLVFKISGAGFDDECLLTITEIRVFQTVDHNTTKDQCEEYNLMAALITDSYNQGPLSIFDNTISSPFTCDNKIDSVSQVSPSQSFSGVNVAEMEMLGHVA	uncharacterized protein FFB20_01933
XLOC_001273	5.42309	5.87871	5.91691	0.96496	0	0	0	0	1.26932	2.14954	2.47252	0.786578	0	0	0	0	FFC1_00113	FFUJ_00080	uncharacterized protein FFUJ_00080	MKTNIVVLIALDILPVLSKSTGDPENQIQCPSLLPNQHISRLHCKTADGSLIHVDGPGPFDCEISYVAIRPPTSIGSTNQDPEELTTNKPGHCELLLIKLTDDGLVQHGCCKGGTAVFVTQEHQVLQPVDPNNSMQKPIRHLQSDDQIIDEKLQTKSEEELKDGYDDEDDDDDDDEGTDKGEEDYDDDDIEEEDDEDEEEDEYGEEDYEDYGINEDIDDRDLFNSRARQEPEAQQNAESRDL	uncharacterized protein Y057_8577
XLOC_015045	23.8048	27.0528	18.3551	4.62849	2.09459	1.27268	0.613379	0.0640897	10.6383	17.8661	13.9103	1.02393	1.959	1.03508	0.663787	0.111007	FFC1_13927	FFUJ_08914	uncharacterized protein FFUJ_08914	MKVSILGLLTLSAFASACASYESCHCYDSNGIPNNGATQTVCDHFKGGTEPNTREYGANTQYKECNVKTFGGGASSFDNCDWRRRCQSAGATGADSSCRSKFP	#N/A
XLOC_006729	351.21	533.641	172.63	74.0017	54.0526	38.8615	28.4816	7.08006	100.27	106.902	20.8957	16.6192	49.6942	31.5982	29.9481	3.06513	FFC1_05826	FFUJ_14553	related to zinc transporter	MARVKSFFESRRATMIAGSLLFVVAVSATANPGAVKRQASATATKTGIDFESLTGCHMHGPTQFCMDGSDEYQIVLEATMTKDPPTSYTDCHSHGSDTYCMNPNGGEVQVLVEGATATTQAAKETAAAKNDEITAVSDCHLSEASLYCMGPSSSEYYVQTTITNTEEYPAQLTSCHSHGEETYCMSDDGEAPILPAEDVESGKADPQQEHCHFHAGVEHCVGGGSEESGTRDCGRKDRDYRIGIRIGMLFVVLVASAVGVFGPILMSTFVPVRSNLVLTILKQFGTGIIISTAFVHLFTHASMMFGNECLGELQYEATTAAIVMAGLFISFLIEFCVQRAMRWQLTKKTETDSAYLSPKAIEKAEMANISIMEAGIIFHSILIGITLVVAGDSFFITLS…	related to zinc transporter
XLOC_002577	18.0952	12.5676	9.44378	3.44975	4.84511	4.53486	4.33197	6.69441	8.87547	6.57809	5.58857	1.92739	0.798923	1.21671	0.25984	3.52131	FFC1_02634	FFUJ_07096	uncharacterized protein FFUJ_07096	MGSNYWNNSSWYDASSPQDQASSPTGYSFDYYQSQPLVRYGSSGSNSQASTRGPESPIDGSYYTLHGSPTMDDTFYQQSHSYQQHYTSGQTRAGESSVPRGESGNDWPVSCLHPGCTSRPFKRTADLIRHYKNTHAPESSKDVYLCDYPRCTRFREPFHRRDHFRDHLREYHCEDIMKRGATVNEEWLEGRYTPSTWWRCPRCLVRVNISKHGYECPGCKTSCESKRKEKRRSRS	egg shell protein
XLOC_006400	6.45207	4.26483	3.01279	0.943134	0.33563	0.427597	0.234873	0.378531	2.41265	1.71007	0.426592	0.198247	0.198639	0.130194	0.210457	0.151691	FFC1_06774	#N/A	#N/A	#N/A	related to 5-carboxyvanillate decarboxylase
XLOC_004457	20.4298	12.7136	7.71893	2.59748	3.71432	3.32083	2.60706	2.27766	10.3498	7.75598	6.949	1.04818	2.07986	1.66056	0.874071	1.23889	FFC1_04558	FFUJ_06045	related to excitatory amino acid transporter	MATKDEFKDVSEAHPVQVPTNSSSDIPHDHAEEEIVKKPWWHSFKEPGSALQIIVAALLAIAIGVVVATQVDDIPEAAPILVGIIGNMWLRALKAMSNGGSLLARWTVGYYIITTLISITLSCIMMGLVWTKQYSVVGTTPLDQEEEEKLKENDRSIPVVVQDMFFSLIPSNVVKALAEDELLAVIITAIIVGYLIESPRSPIVRVTEEIERMITKIIKFLIAVAPIGVFFLILPNLMKLDIGEIGKNLGLLIGATLSTMLIHILIIVPIIFFAFTRMNAYSYWLKISPAWVTAWGTASSAATLSVTLRCAKDRGIPSTIYKFTCPLGCLINMDGTAIYLPAAVVFMAATQGITLGPADYVIVALLSTLASIGVSPIPSASLVLSIMIARSVNVDLTNM…	related to excitatory amino acid transporter
XLOC_007786	7.41486	8.98166	4.41538	1.1634	15.165	31.9394	58.3232	17.6521	5.48521	1.05798	2.45464	0.389396	14.0121	41.9683	85.9228	20.005	FFC1_07832	FFUJ_03399	probable beta-glucosidase	MKLNWVAAALSIGAAGTDSAVALASAVPDTLAGVKVVTRDTLAYSPPHYPSPWMDPNAIGWEEAYAKAKNFVSQLTLLEKVNLTTGVGWQGERCVGNVGSIPRLGMRGLCLQDGPLGIRLSDYNSAFPAGTTAGASWSKSLWYERGLLMGTEFKEKGIDIALGPATGPLGRTAAGGRNWEGFTVDPYMAGHAMAEAVKGIQDAGVIACAKHYIANEQEHFRQSGEVQSRKYNISESLSSNLDDKTMHELYAWPFADAVRAGVGSVMCSYNQINNSYGCQNSKLLNGILKDEMGFQGFVMSDWAAQHTGAASAVAGLDMSMPGDTAFDSGYSFWGGNLTLAVINGTVPAWRVDDMALRIMSAFFKVGRTVEDLPDINFSSWTRDTFGFVHTFAQENREQV…	beta-glucosidase
XLOC_014784	124.219	167.582	70.6515	14.2014	101.166	86.8182	84.2682	43.712	39.5947	12.2354	27.1966	3.9114	26.5179	15.7812	71.0021	11.4868	FFC1_14087	FFUJ_08759	related to trehalase precursor	MPSPRHIAAALAASATTVSALYVNGTVVAPCDSPIYCHGEILEQIELAQPFSDSKTFVDMPAIRPLSEIQDAFDKLDKPLRNNSALTEFLSDYFADAGGELEEVPEDELETDPKFLDKINNTAIKEFTQKVIDIWPDLTRRYDQDSKNCSDCPNSFIPVNRSFVVAGGRFREPYYWDSYWIIEGLLRTGGSFINIAKNTIENFLDFIEEYGFVPNGARIYYLNRSQPPLLSQMIKAYIEHTNDTDILERALPLLVQEHEFFMTNRSVPVYINNETYYLNTYNVSNTRPRPESYREDYVTANNKSYYSPSGEVYSGGEELNFKTKEALYGNLASGAESGLDYSVKWVARPDDAIRDNYFPLRYLNTRNIIPVDLNSILYGNEIAIAEFYEQTGNSSASRQ…	trehalase
XLOC_014783	33.8746	40.3679	18.5218	7.10437	57.367	59.4805	50.0261	29.7066	4.35058	2.40727	7.84358	1.13649	13.9202	16.0979	28.5281	7.60251	FFC1_14086	FFUJ_08760	probable threonine aldolase	MGDAISEKPHNAWLGAKGPAALDLRSDVVTTPTPAMLEAVKSCSLLDDVFQEDPATNDLEAYVAERTGKEAGLFVLSGTMGNQLALRSLLTQPPYSVLCDYRAHIFTAEAGGTSNLTGAQIQTVIPKNGRYMTLEEIQENVTLDDDVHGCPTRVISLENTLHGMVMPLSEVKRISEFAREHGIKLHLDGARLWEAVVSGAGSLTEYCSYFDTISLCLSKGLGAPAGSVIVGPKATLKHARWVRKSIGGGLRQSGVLTSAGRIAIEQTFGKSPNGQDGPLKASHEMARKVDDLWTSMGGTIDEPTETNMVWLNLKATGCSEKRFIEIGAEAGLKFMCNRLVTHYQVAQNEEEVLRRLKIVFEKVLGERGDSSAQQKIGKGSVYVPQ	threonine aldolase
XLOC_007187	1.21689	1.10687	0.649343	0.043929	0.0529089	0	0.02346	0	0.465971	0.842926	0.407966	0.0380595	0.0461678	0.0436047	0.040634	0	FFC1_06703	#N/A	#N/A	#N/A	related to O-methyltransferase
XLOC_008950	92.5769	85.8845	45.3498	16.4666	29.3978	22.1505	24.8399	5.3251	75.6121	24.449	17.9624	7.35862	15.4209	9.50328	10.1468	0.872452	FFC1_08684	FFUJ_08851	probable Na+-transporting ATPase ENA-1	MGETESKSANGAIHATSTSDSSTVAAGQDDKPPIAEPPDLLAIEKPILPHTLSAHRVARDLKSDVDDGLSSEEAAARLARDGPNSIKGAKGISLYEIFIQQIANALTVVLIAVTALSFAISDYIEGGVVAAVIVLNIVVGLIQDYRAEQTIQSLYALSTPKCKVIRDGHSETVKAETLVKGDLVSLATGDVVPADLRLVQGINVSTDEALLTGESIAISKKPDAVFTDPDMPMGDRVNLAYSGSSVTRGRATGIVIATGMETEVGQIAELLRKTKNDDTERTPVGRAVWKFYQFCRRILGLEGTPLQVTLSKFALLLFAFAIVLVIIVFSASLWKITDEVLLYGICVGVAVIPESLLAVLTVTMAVATKAMVRGNVIVRQMPSLEAVGGVTNICSDKTG…	potassium/sodium efflux P-type ATPase, fungal-type
XLOC_001175	1.65019	1.5728	0.992319	0.216524	0.0759785	0	0	0	0.107061	0.38924	0.611802	0.19451	0.129725	0.0612615	0	0.0452096	FFC1_02143	FFUJ_02013	uncharacterized protein FFUJ_02013	MPSIYTLNHGDAGRERQRLDLQHDVFKDITRGDLPPVIWQHLKSVSAPKVADANTGTGIFLKELAARVTEEAQLDGFDIDTRKFHETTSLPANVKLQYGNVLEPFPKQYLGIYDLVHVKLLYAALKKNEWLQAVKNLKTLLKPDGYLFWSEIGAYGYASNPYSAALHEWKRIESAAAVKFGRDPKCPVLLQSQFREADLQQVDEKVFVMLGRPDLTPVITRVALEYMAQSLHGILLVDRDESLGLTESGIESLVETLTKETEDGVEVGTNLHWVWGQNNGMPC	putative methyltransferase domain-containing protein
XLOC_006149	15.4402	15.3217	7.97804	2.11059	52.056	342.509	736.342	1315.52	2.3454	7.75313	1.80346	0.587589	55.4457	554.116	1226.88	2227.38	FFC1_06296	FFUJ_13324	probable formate dehydrogenase	MVKVLAVLYDGGQHAKDQPLLLGTTENELGIRKWLEDQGHTLVTTSDKDDEGSTFDKELEDAEIIITTPFHPGYLTAERLARAKKLKLAVTAGIGSDHVDLNAANKTNGGITVAEVTGSNVVSVAEHVLMTILVLIRNFVPAHEQIEAGDWNVAHAAKQEFDLEGKVVGTVAVGRIGERVLRRLKPFDCKELLYFDYQPLSPEKEKEIGCRRVDTLEEMLAQCDIVTINCPLHEKTKGLFNKDLIAKMKKGSYLVNTARGAIVVKEDVAAALKSGHLAGYGGDVWDHQPAPKQHPLRTAKNNWGGGNAMVPHMSGTSLDAQIRYANGTKAIIDSYLSGRHDYKPEDLIVHQGDYATKAYGQREKK	formate dehydrogenase
XLOC_015765	78.0475	77.6934	45.6641	14.5953	4.32678	4.7927	4.93988	6.60177	13.7148	21.6046	12.5655	9.80967	5.41368	6.36373	6.43781	9.17019	FFC1_14831	FFUJ_02107	probable aspartate kinase	MRSRRDNSWVAQKFGGTSIGKFPDKVAEIVKSARLGGDRPAVICSARSSGKKVFGTTSRLLQVYRTLRGIVAITQDPDMQELLFDRLRSIIRDIRDDQVATVQMYILRQDIRDDTIRQITADCQELLDYTSAAKRFNLDINGKAKDKMVSFGEKLSCRLMVAMLRDRDIPAEYVDLSDIVPSNNLDQLRPDFFHEAAAVFGKRVEACNGRVPVITGFFGAVPGSLIDSGIGRGYSDLCAVLVAIGLHAERVQIWKEVDGIFTADPREVPDARCLPSITPSEAAELTFYGSEVIHHLALSLAIQAKPPVSIFVKNVQKPWGQGTVVVPTDGDDTSSWPIDYLDPSDSDSTSSTALPKMPTAVTIKRDITIFNILSNKQSMSHGFFVKVFTILAEHDISVD…	FUB3
XLOC_016492	5.78096	6.12217	3.29644	0.794405	0	0	0	0	1.64498	3.573	1.3204	0.593333	0	0	0	0	FFC1_15519	FFUJ_12914	related to monocarboxylate transporter	MELEPISIRDPIIVEVETPTEDPDTPPDGGYGWVIIFVCFVHTFWINLWAGSWGILQAALLRTTLKGSSLSAVSFVGSLGVALGPALGIPAIRIVRVIGARAGMTIGIAIYGLGCLASSWAVGSLVGLFFACGVSYGIGSAFTDTLYNTLPVLWFKKRLGLANGIVKLGGSFGALVGAVSVGYLTEGVGVAWTFRILGIASLVTGIPTALLVKDRGAPPEYPVKWSVFRDACFSWHFAAGAVGIFPIYAPTFFLPYINNALGFSNSTSIATLACLLVCMSVGRILTGYACDRVGSMNALFFASLVNAVSLFAVWPFSSNLGLVLLFCILNGLSNGGFAVAIPTAVGRHLPIDDAPGALSLLFTGWAPGIMGGNAISAALIQVTHADVADSIVPFRPAMY…	related to monocarboxylate transporter
XLOC_016322	165.918	147.185	87.3122	25.3484	0.0902581	0.0148278	0.122216	0.109405	65.0398	100.305	45.4613	18.8691	0.0632863	0.0291002	0.112583	0.184079	FFC1_15520	FFUJ_12915	related to nonribosomal peptide synthetase MxcG	MAPAGDLGRRLIPCILDEMSRDEPDRVIYSIAKSADISKGFTEITAREFANAVNKTAWWLEHLVGKSESFQTIGYIGPHDIRYFLLNLACVKVGYQVIFLSPGNSIEAAMGLLAATKCSLWVHPVDYPPYQLVEKIQQTWELRIMEIPTVAELLDASSSPQYPYAKTYDEAMADTFCILHTSGTTGLPKPIYLSNGLLATMDAARILPPFEGDNGARPWATLYEKGDRLYSPCVLLHGPGIFMNLFATFLFDTHSVMGPVGVHPDMDLLASLADYGNIDIWHFMPVYVNELGQHPEVLDKFRSSKFIGAGGGPVSAELAAKVNEVVRVHNLFGTTEGLFMGDMLVDKEDFLWVSFHPYAGFEYTEIERGLFEQRAVKNEHWALHQGIFHTFPDVNEFNF…	related to nonribosomal peptide synthetase MxcG
XLOC_015764	230.571	166.996	93.6339	31.2168	26.0623	34.1299	25.0766	26.2489	56.4076	58.9643	37.4578	28.2641	37.6908	54.2475	35.4108	39.6371	FFC1_14830	FFUJ_02106	uncharacterized protein FFUJ_02106	MATELKEYLVIIPDLPDVLAKRQVLLKPHNQDAAPLVKAGRVPFFGSTLAHHSAEGQQVAENGTVMIIKAESEEEIKEIIRKDIFTIEGVWDFGKLSIWPFKSK	YCII-related domain protein
XLOC_015809	6.36684	5.19434	2.79611	0.611809	1.16741	2.46751	0.551542	1.98508	3.92254	3.30563	2.51138	0.446926	0.950295	0.859487	0.479027	1.31924	FFC1_14919	FFUJ_02199	uncharacterized protein FFUJ_02199	MQFSIFSILAIATVAIAAPQSACENGGLFYSDPKTLEPCKSACAGGTCAFQGTCETDPNIPLLCLAKCTC	#N/A
XLOC_016321	219.477	175.518	99.0749	31.1395	0.0917303	0.0895475	0.121161	0.047105	81.4984	143.384	64.4613	24.7853	0.103704	0.136423	0.131119	0.0792563	FFC1_15517	FFUJ_12912	related to gibberellin 20-oxidase	MPSAIDSIPIASFETINYSALERRDAKEIEKLMGASRTAGFFYLDFDRSGAAGLPKKKKEVLKAMKEYFSQPDDIKQLDSKGVPTRGYVKKGTFTAVDPSRPDESFEHLAIGTHDLGTNIASTLPAVFKKAGTLIPDYVALCERVVDVLLDCYSQALGVPGQFLEYHDHEKPSDTILAMLSYPGKLTHQKHTDLGSLTVLFSDEWGLQVVEPSNGNWEWVEPRENDAVINVGDTLRFLSGKTLYSCVHRVIRDGRASDEGHRYSIAYLLRPGDDVSFVDADGSRITAQSFAGIKYKAYSADHAEQDKNTVLTGGMEQVLGVRA	related to gibberellin 20-oxidase
XLOC_016491	272.439	211.623	118.954	34.7014	0.175716	0.271334	0.0525872	0	116.521	161.642	69.9001	27.1468	0.179478	0.109151	0.0991594	0	FFC1_15518	FFUJ_12913	uncharacterized protein FFUJ_12913	MAAAVSNAHPSLPQARPSSAGQSHSGLLKVVRSDQPFKSAAISLVSLPPGALFAKITEATHAPHATWTSFQTGRDKHMEFNSDIVFINHSCDPNLVVDTTRMEVRVADDRHIAKGDELTWFYPSAEWEMAQSFPCECGTERCLVAIRGSRYVEPEKLKGYFLNKHIHELMEKNGSKQ	uncharacterized protein FFUJ_12913
XLOC_015971	296.26	275.283	124.869	46.3742	67.3976	69.0236	57.8615	66.1379	29.2434	73.7448	29.0439	30.8188	32.9331	36.7137	27.7112	24.2293	FFC1_14838	FFUJ_02113	probable reductase RED1	MGGEVSNKTWVFKKSPSSLPEPGVHTAFEDRPLSLVAPPGGLVIKLLTAGLDPHQRDRMRGAGNVDYVPGYEVNEPITNFSIAKVIRSDNDVFEEGSLIAGSLPIAEYGIIPRELIDARAMASPLVWKVSNDYNLDVKHYVGTLGLAGMTAWNSFYGLVKAVKGETIWVNAASSSVGEVVVQLAKIEGMKVIASVSSDDKLDYVVNELGADVGFNYRKEPVGKALKPAIENMKWFGRIISCGTASQYNKPVEEQYGVTNLSEIFRRRIKIQGFIFWDDNIYTDNIENFKATMPKWVSEGKIKSRYTQFEGIEQADKAFLSMFTGGSHGKTVLKISDP	probable reductase RED1
XLOC_015972	315.485	300.377	120.52	37.7362	40.1411	35.4987	31.0846	41.147	42.2725	67.4963	41.1808	27.663	59.2259	51.7668	46.0649	55.8648	FFC1_14839	FFUJ_02114	probable O-acetylhomoserine (thiol)-lyase	MAEQVFQNFETLQLHAGYTPDPHTRSTAVPIYATSSYTFNDSAHGARLFGLKELGNIYSRLMNPTVDVFEKRIAALEGGIAAAATSSGQAAQFLTIATLAKAGDNIVASSHLYGGTYNQLNVLLPRFGIKTKFVRSGKLEDYAAAIDDQTRAIYVESMSNPDYVVPDFEGIAKIAHEHGIPLVVDNTLGAGGYYIRPIEHGADIVVHSATKWIGGHGTTIGGVIVDSGRFNWNKHSDRFPEMVEPSPSYHGLKYWEAFGPATFITRIRVEMLRDIGACLSPFSAQQLLLGIETLGLRAERHAQNTEKLSKYFESSPNVSWVLWPGSESHPTYSQAKKYLTRGFGAMLSIGVKGDASAGSKVVDGLKLVSNLANVGDAKSLAIHPWSTTHEQLSEDERLA…	O-acetylhomoserine (thiol)-lyase
XLOC_015769	48.4861	43.6039	16.4114	5.52303	4.88695	4.88909	4.25876	6.96018	3.20099	10.4781	4.85534	3.98701	7.07753	6.99536	6.13671	9.74625	FFC1_14840	FFUJ_02115	related to nonribosomal peptide synthetase MxcG (component of the myxochelin iron transport regulon)	MGSISHLPVYGHRLLPVVIDEIARDEPDRVLFYTPRNGQPSQGYDKVTTKIFANSINRLCGWLDSQLGSPTVSKTIAYIGQNDLRYFIMMIASTKLGHRLLLSSPRNSVEGHVSLIKQSGCEFWIASSGLDHHGFLQDLQIPSVEAPELSQLLDPTPLKPYVYQKSWNEGKSDILALLHTSGSTGLPKLVPVYLETAATVDGFHLMELTNGKRPTGVEWTGTRQLCAMPLFHVAGICLGLYSAVFFNWTVVLPSVGPIMQHVIEDALDHITLDSAFISPSVLQDISKSPRVLEKLSKLKFITSAGGPIPQSVGDLIHPRVPIMQTMGMTEGQWLASVVTHPDEWAYYYFHPRTGVEMRPYSEDLSELVFVQNPKLTATQPVFKTFPELDIWETKDLYSR…	related to nonribosomal peptide synthetase MxcG (component of the myxochelin iron transport regulon)

## Sheet: Strange pattern
Probe	WT_0	WT_15	WT_60	WT_240	WC_0	WC_15	WC_60	WC_240	WT_0_desv	WT_15_desv	WT_60_desv	WT_240_desv	WC_0_desv	WC_15_desv	WC_60_desv	WC_240_desv	Feature	IMI	Protein name	Seq	Description
XLOC_010582	9.88435	0	4.32078	7.78436	7.2393	10.3498	12.9826	5.48711	3.40151	0	4.18172	5.61484	8.0319	2.81812	3.17241	4.85611	null	#N/A	#N/A	#N/A	#N/A
